# Supplementary material
Source: bioRxiv or medRxiv preprint supplement (https://www.biorxiv.org/highwire/filestream/10557/field_highwire_adjunct_files/0/034413-1.pdf)
Supplement: Supplementary file [file 034413-1.pdf]

**SUPPLEMENTARY MATERIALS (SM)**

## RESULTS

rs2218404. Neither WM nor PO and PS domain scores (N = 19 patients for the T allele carriers for WM and PS) were significantly attenuated comparing to G/G carriers (N = 34 patients for WM and PS;  $p = 0.12$  (F = 2.50) and  $p = 0.11$  (F = 2.59) for the WM and PIQ, respectively, and  $p = 0.14$  (F = 2.19) for the PS) (**Figure 1B-1**). None of the healthy human subjects IQ scores were affected by the presence of T allele (N = 62 for T and N = 81 for G/G) and were significantly higher than patients' scores (see **ST1** for the diagnosis effect statistics and interaction).

rs96501. No substantial difference in the IQ scores has been observed among the patients either C (N = 20) or T/T (N = 41) allele carriers despite a decline across the all scores comparing to healthy subjects (**ST1**).

rs1105684. Within SCZ patients cohort a cognitive endophenotype was not detectable (N = 33 and N = 67 for the A and T/T alleles carriers, respectively) with very close scores for both genotyping groups but substantially lower than for the healthy subjects (**ST1**).

rs2149171. WM contributing scores of letter number sequencing (LNS), digit span (DS) and arithmetic (AM) did not differ significantly among the genotypes (**Figure 1B-2**, lower panel) indicative of rather a distributive nature of the mutation allele effect on the final WM score. None of the healthy human subjects IQ scores were affected by the C allele presence and were repeatedly higher than for the SCZ patients' scores at the diagnosis level (**ST1**).

rs2274855. Similarly to the rs2149171 C-allele-produced phenotype, the attenuated PIQ was due to lower PO scores ( $p = 0.012$  (F = 6.36)) while the PS stays unaffected by the A-allele presence, contrary to the rs2218404 endophenotype. None of the healthy subjects scores were affected by the A-allele presence but meanwhile diagnostically being higher than that of SCZ patients (**ST1**).

None of the other 3 ROIs of *NTNG1* (rs7851893, rs3824574 and rs2149171) display any significantly different evolutionary rate changes (**Figure 3C**) possibly due to the highly conservative nature of the embedding them DNA (**Figure 3B**). The ROI of rs2218404 is 100% conserved across all hominins (no

other mutations are detectable in the  $\pm 50$  nu regions as well, **SM**) but contains two point mutations in chimpanzee, 6 in marmoset (due to «GCC» duplication) and 9 in mouse (**Figure 2D**, **SM**: rs2218404). Evolution of the other 3 ROIs non-affecting IQ SNPs (rs1373336, rs1444042 and rs4915045) shows much in common such as major allele fixation in primates (C, A and A, respectively), stronger conservation of the primates' ROIs and the following 100% conservation of ROIs across the hominin species. There is 1 mutation for chimpanzee and 3 for marmoset in rs1373336 ROI plus an extra marmoset-related mutation in rs1444042 ROI. Other primates ROIs are 100% identical to the human ones. Next on the gene is a non-affecting IQ ROI of rs628117 also characterised by 100% conservation in hominins and has only 1 mutation in chimpanzee comparing to human but 9 mutations in the marmoset ROI with 7 of them being asymmetrically nested in the preceding the allele 5'-sequence and resulting in the characteristic inflection point of brake on the percent identity plot on **Figure 2B**. It is also interesting to note the C/T alleles intermingled transition across the all analysed species. rs96501 ROI is 100% conserved starting from chimpanzee but dramatically different in the following the allele's positioning 3'-sequence shoulder of marmoset (contains 6 mutations). The T-allele of rs1105684 is strongly conserved across all primates and hominins however its ROI undergoes dramatic changes with 8 and 15 out of 20 nu mutated in marmoset and mice, respectively. Mice rs7851893 ROI is poorly conserved (5 mutations) and displays the third highest value for the evolutionary advancements rate (**Figure 3C**) from mice to marmoset after rs1105684 and rs2274855 (**Figure 3C**). Mice rs3824574 ROI contains 1 mutation. The T-allele of rs3824574 is not detectable in any of the analysed species but its analogue in rs7851893 is gradually substituted on G-allele starting from MezmayaskayaNea and Mesolithic hominins. -50 nu DNA stretch preceding the rs3824574 allele position contains a MezmayaskayaNea-specific substitution however 30 nu away (**Figure 3B**, right panel). A Denisovan-specific mutation is found 46 nu downstream of the rs2149171 mutation allele position within the ROI. The ROI of rs2274855 is strongly conserved in primates with 1 mutation per chimpanzee and marmoset each but containing significant evolutionary changes in mice ROI (8

mutations). This is the another ROI (alongside with the rs2218404 ROI affecting the VC, **Figure 2C**) undergoing an AE from chimpanzee to human.

There are 5 point mutations in Eskimos Netrin-G1 relative to modern human reference genome (N363S, V385G, D405G, E461G, P506R) located in the middle and end of the protein with no other aa substitutions found across all other analysed hominins (due to poor genome coverage the protein information for both genes is not always complete, see **SM**). One mutation found for chimpanzee (A81S) is absent in all other analysed species; marmoset contains 4 mutations (L32V, D553G, P564R, A565T), and mouse – 20 mutations relative to the human ortholog (P24L, L25F, L32V, T35S, Q36L, M48T, T78S, D184H, T215S, V305S, V307L, N363T, H501Y, H523Q, L529A, A532D, D553E, H561R, T571M, S577G). Two mutations are shared among the mice and marmoset proteins (L32V and D553E/G) and one mice mutation is also found in the reconstructed Eskimos protein (N363T/S). As for Netrin-G2, there are 5 mutations in the Eskimos protein (T346A, K352R, A375G, D409G, E465G, P510R). Loschbour, Motala12, and AltaiNea each contains only one mutation - T346A. Motala3 – 2 mutations (S200L, R201C), VindijaNea – 3 mutations (H10Y, T346A, L573I), Denisovan – 2 mutations (R181Q, T346A), MezmayaskayaNea – at least 1 mutation (T311I), chimpanzee – 2 mutations (T346A, S371A), marmoset – 12 mutations (A104V, M298V, A345S, T346A, S364G, A370V, S371V, A381T, Y389S, Q521L, R568H, R587H), and mouse – 49 mutations (H3R, A15V, K98R, E100D, I110V, T130S, M139V, S187P, L237M, L249F, S297T, M298V, K318R, S327A, T346A, K352S, W353Q, R355K, S357P, A359M, R365F, S367P, A370S, R372S, G377A, T378I, P379S, A380V, A382V, A384S, P385Q, G388D, Y389S, K390T, Q393E, K397R, M402I, A491V, L527Q, R536P, V541I, P550L, G555A, L557P, A565I, A566V, A570D, G586A, R587C). The mice protein is also 2 aa longer than human Netrin-G2 due to extra 3 aa present in {LE1(ex5)-Ukd} area: X350A; X364G; X365D (**Figure 3F**, as per mice coordinates) and one aa preceding the GPI-link (D554X) is absent (see **SM**: Netrin-G2). Similarly to Netrin-G1, Eskimos and mouse have the same aa residue affected – K352R/S (**Figure 4F**). Marmoset and mouse share four mutations not found in other

species (M298V, A370V/S, Y389S, R587H/C), and the aforementioned T346A shared with other hosts. Interestingly that despite truly belonging anatomically to primates (as a “New World Monkey”) marmoset shares higher number of coding (**Figure 3F**) and non-coding (**Figure 3D**) mutations with mouse rather than with the “Old World Monkey” - chimpanzee though corroborating the reported conservation of the cortical area genetic markers with mice (**Mashiko et al., 2012**). It is also noted that if the mice-specific Netrin-G1 point mutations are predominantly located at the N- and C-termini of the protein (domains LE1 and GPI-link, respectively), 26 out of total 52 Netrin-G2 point mutations are middle part nested (exon5 + Ukd domain), another 12 are at the C-termini and the rest is spread across the other areas (**SM**).

## DISCUSSION

The T-allele of rs1105684 is strongly conserved across all primates and hominins but not the ROI area which in turn undergoes dramatic changes with 8 and 15 out of 20 nu being mutated in marmoset and mice, respectively, demonstrating some potential evolutionary significant events taking place and possibly linked to the T-allele emergence. The mutation alleles of rs11056893 (affecting VIQ and PIQ) and rs7851893 (non-affecting IQ) occupy strategically important locations at the beginning of the gene (intron (1-2) precedes the coding exon 2, **Figure 3A**) but are separated from each other by 428 nu. Displaying distinct cognitive endophenotypes functionality (while both being associated with SCZ) they represent an example of a strong positive selection of an intron loci as opposite to a neutral drift (**Kimura, 1983**) of the non-coding area. The fact that rs1105684 A-allele substitution of a strongly conserved T allele (>40 mln yrs as per marmoset) affects healthy individuals may be indicative of its devastating impact on *NTNG2* function which does not require an interaction with the diagnosis of SCZ for an effect to take a place (a variation of a TATA-box embedding the allele is envisaged). In general, two distinct patterns emerge when the ROIs embedding all 11 analysed *NTNG* SNPs are compared. 1 pattern: a ROI either undergoes a sequence identity relaxation when moving away down from human across the evolutionary distant species (rs2218404, rs1373336, rs628117, rs96501, rs1105684), or opposite, 2 pattern: a ROI represents a high level of conservation (>95%) starting from marmoset (rs1444042, rs4915045, rs7851893, rs3824574, rs2149171, and rs2274855) and sometimes even including the mice ROI (rs3824574, rs2149171). Two ROIs belonging to group 1 pattern, rs2218404 and rs1105684, share substantial visual geometrical similarity represented as a funnel-like plots where the low percent of sequence identity preceding and following the mutation allele (and embedded predominantly into the defined ROIs) is gradually removed upon moving both sides away from the allele position. Two other ROIs from this group, rs628117 and rs96501, display unique among others asymmetrically dramatic changes in the identity affecting either of the area sides (**Figure 3B**, low left and middle). Notably that rs628117 and rs96501 are both located in the centre of the

identity plot inclination points possibly demarcating the boundaries of the following and preceding, respectively, non-coding conserved islands of the intron (9-10) (**Figure 3A**). Significance of such intron-specific location manifests itself in the PS score affected by the rs96501 (**Figure 1B-1**). Group 2 pattern can be further subdivided as: a) with the percent identity becoming stronger when moving away from the ROI (rs1444042); b) weaker (rs7851893 and rs2149171); and c) mixed (rs4915045, rs3824574, rs2274855). Interestingly, that 3 out of the group 1 pattern ROIs (rs2218404, rs96501, rs1105684) affect IQ scores in human with two of them being *NTNG1* borne (rs2218404, rs96501) and one - *NTNG2* (rs1105684). In the second group there are two out of six ROIs (rs2149171 and rs2274855) affecting IQ and both are *NTNG2*-nested (**Figure 3A**).

With all cares being taken to represent the extinct *NTNGs* composition as accurately as possible some potential technical faults cannot be excluded. C to T and G to A are known drastically elevated transitions in the ancient DNA strands breaks (**Briggs et al., 2007**). And C deamination at 5'-overhangs leads to greater C/T misincorporation rates and converts into a complementary increase in G/A (**Briggs et al., 2007**), e.g. 5'-TCC-3'→5'-TTC-3' (potentially affecting rs96501), which is a common somatic mutation in melanoma skin cancers (**Harris, 2015**).

Eskimos is described as having had brown eyes, A+ blood type, not a light skin but having had dark and thick hair (for ref. see **Rasmussen et al., 2010**). Based on the prevailing number of SNPs (coinciding with our findings for *NTNG2* protein, **Figure 3F**) its genome does not show affinity to the modern-day Europeans but rather to the modern populations of northeast Siberia (**Sarkissian et al., 2015**). As for Neanderthals, some of them were probably red-haired and pale skinned, were able to taste bitter, have had a blood type *O* (for ref. see **Sanchez-Quinto and Lalueza-Fox, 2015**) and even were able to “enunciate as we do” (**Pollard, 2009**; interpreting **Krause et al., 2007**).

## REFERENCES

- Briggs AW**, Stenzel U, Johnson PLF, Green RE, Kelso J, Prüfer K, Meyer M, Krause J, Ronan MT, Lachmann M, Pääbo S. 2007. Patterns of damage in genomic DNA sequences from a Neandertal. *Proceedings of the National Academy of Sciences of the United States of America* **104**:14616-14621. doi: [10.1073/pnas.0704665104](https://doi.org/10.1073/pnas.0704665104).
- Harris K**. 2015. Evidence for recent, population-specific evolution of the human mutation rate. *Proceedings of the National Academy of Sciences of the United States of America* **112**:3439-3444. doi: [10.1073/pnas.1418652112](https://doi.org/10.1073/pnas.1418652112).
- Kimura M**. 1983. The neutral theory of molecular evolution. Cambridge University Press.
- Krause J**, Lalueza-Fox C, Orlando L, Enard W, Green RE, Burbano HA, Hublin J-J, Hänni C, Fortea J, de la Rasilla M, Bertranpetit J, Rosas A, Pääbo S. 2007. The derived *FOXP2* variant of modern humans was shared with neandertals. *Current Biology* **17**:1908-1912. doi: [10.1016/j.cub.2007.10.008](https://doi.org/10.1016/j.cub.2007.10.008).
- Mashiko H**, Yoshida AC, Kikuchi SS, Niimi K, Takahashi E, Aruga J, Okano H, Shimogori T. 2015. Comparative Anatomy of Marmoset and Mouse Cortex from Genomic Expression. *Journal of Neuroscience* **32**:5039-5053. doi: [10.1523/jneurosci.4788-11.2012](https://doi.org/10.1523/jneurosci.4788-11.2012).
- Pollard KS**. 2009. What makes us human? *Scientific American* **300**:44-49.
- Rasmussen M**, Li YR, Lindgreen S, Pedersen JS, Albrechtsen A, Moltke I, Metspalu M, Metspalu E, Kivisild T, Gupta R, Bertalan M, Nielsen K, Gilbert MTP, Wang Y, Raghavan M, Campos PF, Kamp HM, Wilson AS, Gledhill A, Tridico S, Bunce M, Lorenzen ED, Binladen J, Guo XS, Zhao J, Zhang XQ, Zhang H, Li Z, Chen MF, Orlando L, Kristiansen K, Bak M, Tommerup N, Bendixen C, Pierre TL, Grønnow B, Meldgaard M, Andreasen C, Fedorova SA, Osipova LP, Higham TFG, Ramsey CB, Hansen TVO, Nielsen FC, Crawford MH, Brunak S, Sicheritz-Pontén T, Villems R, Nielsen R, Krogh A, Wang J, Willerslev E. 2010. Ancient human genome sequence of an extinct Palaeo-Eskimo. *Nature* **463**:757-762. doi: [10.1038/nature08835](https://doi.org/10.1038/nature08835).



**Sanchez-Quinto F and Lalueza-Fox C.** 2015. Almost 20 years of Neanderthal palaeogenetics: adaptation, admixture, diversity, demography and extinction. *Philosophical Transactions of the Royal Society B-Biological Sciences* **370**:20130374. doi: [10.1098/rstb.2013.0374](https://doi.org/10.1098/rstb.2013.0374).

**Sarkissian CD,** Allentoft ME, Ávila-Arcos MC, Barnett R, Campos PF, Cappellini E, Ermini L, Fernández R, da Fonseca R, Ginolhac A, Hansen AJ, Jónsson H, Korneliussen T, Margaryan A, Martin MD, Moreno-Mayar JV, Raghavan M, Rasmussen M, Velasco MS, Schroeder H, Schubert M, Seguin-Orlando A, Wales N, Gilbert MTP, Willerslev E, Orlando L. 2015. Ancient genomics. *Philosophical Transactions of the Royal Society B-Biological Sciences* **370**:20130387. doi: [10.1098/rstb.2013.0387](https://doi.org/10.1098/rstb.2013.0387).

## SUPPLEMENTARY METHODS

### Ancient hominins and primates genomes reconstruction

Aligned bam-files (IceMan, Hunters, VindijaNea, AltaiNea, MezmaiskayaNea) or vcf-files (Denisovan/pinky, Chimpanzee) were obtained from the corresponding open sources (ST2) and re-processed by using one of the following pipelines – depending on type of the source file available. In the case if bam-files were available – a “consensus DNA sequence” was generated by using “SAMtools” and “seqtk” [1] software:

```
$ samtools mpileup -uf genome.fa input.bam | bcftools view -cg - | vcfutils.pl vcf2fq > consencus.fq  
$ seqtk seq -l 50 -A consencus.fq > consencus.fa
```

In the case when only vcf-files were available, - the consensus DNA sequence was generated by using Genome Analysis Toolkit (GATK) software [2]:

```
$ java -Xmx2g -jar GenomeAnalysisTK.jar -lw 50 -R genome.fa -T FastaAlternateReferenceMaker \  
-L TARGET.intervals -o consencus.fa --variant input.vcf.gz
```

Having consensus DNA sequences and coordinates of regions of interest (ROI) around each SNPs position it was straightforward to extract ROI’s nucleotide sequences and/or exons/introns nucleotide sequences corresponding to a particular ancient DNA sample by using “fastahack” software [3] and custom Python scripts (available upon request).

### Supplementary References

[1] Heng Li, “seqtk” - tool for processing sequences in the FASTA or FASTQ format.

<https://github.com/lh3/seqtk>

[2] DePristo MA, Banks E, Poplin RE, et al. A framework for variation discovery and genotyping using next-generation DNA sequencing data. Nature genetics. 2011;43(5):491-498. doi:10.1038/ng.806.

[3] Erik Garrison, “fastahack” - FASTA file indexing and sequence extraction tool.

<https://github.com/ekg/fastahack>



**Supplementary Table 1 (ST1, cont.).** Statistics for the effect of *NTNG2* SNPs (rs2274855 and rs1105684) on cognitive domains and scores in human subjects as measured by WAIS-III. Related to **Fig. 1B-2** in the main text. <sup>s</sup> - working memory, letter number sequencing and processing speed.

| WAIS-III                           | Schizophrenia (N = 59) |      |                   |      | Control (N = 143) |      |          |      | ANCOVA (sex, education) <i>p</i> values ( <i>F</i> values) |                     |                                                 |                      |              |
|------------------------------------|------------------------|------|-------------------|------|-------------------|------|----------|------|------------------------------------------------------------|---------------------|-------------------------------------------------|----------------------|--------------|
| Variables                          | A carrier              |      | G/G               |      | A carrier         |      | G/G      |      | Diagnosis                                                  | Genotype            | Interaction                                     |                      |              |
| NETRIN G2; NTNG2                   | (N = 33)               |      | (N = 26)          |      | (N = 91)          |      | (N = 52) |      | effect                                                     | effect              |                                                 |                      |              |
| rs2274855                          | Mean                   | SD   | Mean              | SD   | Mean              | SD   | Mean     | SD   |                                                            |                     |                                                 | SZ                   | HC           |
| Verbal IQ                          | 86.1                   | 16.2 | 96.5              | 15.0 | 108.8             | 14.2 | 108.6    | 12.2 | <b><math>9.68 \times 10^{-11}</math> (46.83)</b>           | <b>0.017 (5.83)</b> | <b>0.018 (5.70)</b>                             | <b>0.020 (5.70)</b>  | 0.98 (<0.01) |
| Performance IQ                     | 78.3                   | 15.8 | 86.0              | 15.1 | 108.9             | 11.1 | 109.8    | 11.6 | <b><math>3.77 \times 10^{-27}</math> (159.57)</b>          | <b>0.036 (4.46)</b> | 0.11 (2.58)                                     |                      |              |
| Full-scale IQ                      | 81.1                   | 16.2 | 90.9              | 15.6 | 109.6             | 12.2 | 109.9    | 11.6 | <b><math>1.03 \times 10^{-20}</math> (110.02)</b>          | <b>0.012 (6.44)</b> | <b>0.025 (5.07)</b>                             | <b>0.033 (4.80)</b>  | 0.77 (0.09)  |
| Verbal Comprehension               | 88.8                   | 17.0 | 95.5              | 14.1 | 106.8             | 13.4 | 106.7    | 12.5 | <b><math>1.37 \times 10^{-7}</math> (29.91)</b>            | 0.14 (2.23)         | 0.16 (1.98)                                     |                      |              |
| Perceptual Organization            | 80.9                   | 15.9 | 90.0              | 14.7 | 107.5             | 11.8 | 108.6    | 12.8 | <b><math>1.49 \times 10^{-19}</math> (101.86)</b>          | <b>0.012 (6.36)</b> | 0.056 (3.68)                                    |                      |              |
| Working Memory <sup>s</sup>        | 84.0                   | 11.8 | 95.0              | 14.3 | 106.0             | 16.7 | 105.8    | 14.6 | <b><math>1.30 \times 10^{-8}</math> (35.36)</b>            | <b>0.023 (5.28)</b> | <b>0.023 (5.23)</b>                             | <b>0.0031 (9.73)</b> | 0.99 (<0.01) |
| Processing Speed <sup>s</sup>      | 77.0                   | 16.9 | 84.0              | 10.6 | 109.2             | 11.8 | 109.9    | 15.0 | <b><math>1.01 \times 10^{-25}</math> (149.62)</b>          | 0.12 (2.45)         | 0.20 (1.64)                                     |                      |              |
| Comprehension                      | 13.4                   | 5.2  | 17.4              | 5.0  | 21.0              | 4.4  | 19.9     | 4.1  | <b><math>1.99 \times 10^{-9}</math> (39.61)</b>            | <b>0.035 (4.49)</b> | <b><math>2.27 \times 10^{-4}</math> (14.12)</b> | <b>0.0063 (8.06)</b> | 0.12 (2.44)  |
| Arithmetic                         | 11.9                   | 3.7  | 13.7              | 4.2  | 17.2              | 4.6  | 17.5     | 4.3  | <b><math>2.06 \times 10^{-8}</math> (34.19)</b>            | 0.067 (3.39)        | 0.27 (1.24)                                     |                      |              |
| Digit Span                         | 16.1                   | 3.2  | 18.2              | 4.2  | 19.0              | 4.3  | 19.3     | 4.5  | <b>0.0040 (8.47)</b>                                       | <b>0.026 (5.04)</b> | 0.10 (2.70)                                     |                      |              |
| Letter Number Sequen. <sup>s</sup> | 10.0                   | 3.1  | 11.4              | 2.4  | 13.9              | 2.8  | 13.3     | 2.3  | <b><math>4.77 \times 10^{-8}</math> (32.39)</b>            | 0.27 (1.22)         | <b>0.031 (4.73)</b>                             | 0.053 (3.95)         | 0.32 (0.98)  |
| Picture Completion                 | 7.2                    | 3.0  | 7.7               | 3.2  | 11.1              | 2.4  | 11.3     | 2.9  | <b><math>3.98 \times 10^{-15}</math> (72.74)</b>           | 0.46 (0.56)         | 0.77 (0.09)                                     |                      |              |
| Block Design                       | 7.0                    | 3.9  | 9.1               | 3.4  | 11.1              | 2.7  | 11.3     | 2.9  | <b><math>2.07 \times 10^{-8}</math> (34.18)</b>            | <b>0.010 (6.82)</b> | <b>0.041 (4.23)</b>                             | <b>0.028 (5.08)</b>  | 0.57 (0.32)  |
| Matrix Reasoning                   | 6.8                    | 3.0  | 8.7               | 3.2  | 11.6              | 2.7  | 11.6     | 2.4  | <b><math>2.11 \times 10^{-14}</math> (68.26)</b>           | <b>0.024 (5.19)</b> | <b>0.038 (4.34)</b>                             | <b>0.038 (4.54)</b>  | 0.84 (0.04)  |
|                                    | <sup>s</sup> N=29      |      | <sup>s</sup> N=23 |      |                   |      |          |      |                                                            |                     |                                                 |                      |              |

| WAIS             | Schizophrenia (N = 100) |      |          |      | Control (N = 145) |      |          |      | ANCOVA (sex, education) <i>p</i> values ( <i>F</i> values) |             |             |             |                     |
|------------------|-------------------------|------|----------|------|-------------------|------|----------|------|------------------------------------------------------------|-------------|-------------|-------------|---------------------|
| Variables        | A carriers              |      | T/T      |      | A carriers        |      | T/T      |      | Diagnosis                                                  | Genotype    | Interaction |             |                     |
| NETRIN G2; NTNG2 | (N = 33)                |      | (N = 67) |      | (N = 49)          |      | (N = 96) |      | effect                                                     | effect      |             |             |                     |
| rs1105684        | Mean                    | SD   | Mean     | SD   | Mean              | SD   | Mean     | SD   |                                                            |             |             | SZ          | HC                  |
| Verbal IQ        | 91.5                    | 18.9 | 92.4     | 14.9 | 106.3             | 13.2 | 110.5    | 13.5 | <b><math>2.59 \times 10^{-11}</math> (48.98)</b>           | 0.10 (2.72) | 0.32 (1.01) | 0.82 (0.05) | <b>0.029 (4.90)</b> |
| Performance IQ   | 84.4                    | 18.7 | 82.6     | 15.4 | 107.2             | 12.1 | 110.6    | 10.8 | <b><math>3.03 \times 10^{-27}</math> (151.16)</b>          | 0.58 (0.31) | 0.11 (2.51) | 0.52 (0.41) | <b>0.048 (3.99)</b> |
| Full-scale IQ    | 87.2                    | 19.8 | 86.7     | 15.5 | 107.3             | 12.5 | 111.4    | 11.6 | <b><math>6.24 \times 10^{-21}</math> (106.78)</b>          | 0.23 (1.45) | 0.17 (1.92) | 0.81 (0.06) | <b>0.018 (5.70)</b> |



**Supplementary Table 2 (ST2)**

| <b>Dataset Name</b>                                | <b>Link to the dataset</b>                                                                                                                                                                                                                                         | <b>File name(s) used</b>                                                                                                                                                                                                       |
|----------------------------------------------------|--------------------------------------------------------------------------------------------------------------------------------------------------------------------------------------------------------------------------------------------------------------------|--------------------------------------------------------------------------------------------------------------------------------------------------------------------------------------------------------------------------------|
| Saqqaq-Eskimos ( <b>Rasmussen et al., 2010</b> )   | <a href="http://www.binf.ku.dk/saqqaq/">http://www.binf.ku.dk/saqqaq/</a>                                                                                                                                                                                          | chr1.diff.annotation<br>chr1.same.annotation.gz<br>chr9.diff.annotation<br>chr9.same.annotation.gz<br>chr1.diff.highconfidence.PP<br>chr1.same.highconfidence.PP<br>chr9.diff.highconfidence.PP<br>chr9.same.highconfidence.PP |
| IceMan (Ötzi, <b>Keller et al., 2012</b> )*        | <a href="ftp://ftp.sra.ebi.ac.uk/vol1/ERA081/ERA081021/bam/">ftp://ftp.sra.ebi.ac.uk/vol1/ERA081/ERA081021/bam/</a>                                                                                                                                                | ellen1.bam                                                                                                                                                                                                                     |
|                                                    | <a href="ftp://ftp.sra.ebi.ac.uk/vol1/ERA081/ERA081149/bam/">ftp://ftp.sra.ebi.ac.uk/vol1/ERA081/ERA081149/bam/</a>                                                                                                                                                | ellen2.bam                                                                                                                                                                                                                     |
|                                                    | <a href="ftp://ftp.sra.ebi.ac.uk/vol1/ERA081/ERA081149/bam/">ftp://ftp.sra.ebi.ac.uk/vol1/ERA081/ERA081149/bam/</a>                                                                                                                                                | teresa.bam                                                                                                                                                                                                                     |
| Hunters ( <b>Lazaradis et al., 2014</b> )**        | <a href="http://www.ebi.ac.uk/ena/data/view/PRJEB6272">http://www.ebi.ac.uk/ena/data/view/PRJEB6272</a>                                                                                                                                                            | Loschbour.hg19_1000g.bam<br>Motala1.bam<br>Motala3.bam<br>Motala12.bam                                                                                                                                                         |
| VindijaNea ( <b>Geen et al., 2010</b> )*           | <a href="ftp://hgdownload.cse.ucsc.edu/gbdb/hg18/neandertal/seqAlis/">ftp://hgdownload.cse.ucsc.edu/gbdb/hg18/neandertal/seqAlis/</a>                                                                                                                              | all-hg18.bam                                                                                                                                                                                                                   |
| Denisovan/pinky ( <b>Prüfer et al., 2013</b> )**   | <a href="http://cdna.eva.mpg.de/neandertal/altai/Denisovan/">http://cdna.eva.mpg.de/neandertal/altai/Denisovan/</a>                                                                                                                                                | DenisovaPinky.hg19_1000g.1.mod.vcf.gz<br>DenisovaPinky.hg19_1000g.9.mod.vcf.gz                                                                                                                                                 |
| AltaiNea ( <b>Prüfer et al., 2013</b> )**          | <a href="http://cdna.eva.mpg.de/neandertal/altai/AltaiNeandertal/bam/">http://cdna.eva.mpg.de/neandertal/altai/AltaiNeandertal/bam/</a>                                                                                                                            | AltaiNea.hg19_1000g.1.dq.bam<br>AltaiNea.hg19_1000g.9.dq.bam                                                                                                                                                                   |
| MezmaiskayaNea ( <b>Prüfer et al., 2013</b> )**    | <a href="http://cdna.eva.mpg.de/neandertal/Mezmaiskaya/bam/">http://cdna.eva.mpg.de/neandertal/Mezmaiskaya/bam/</a>                                                                                                                                                | E733.bam                                                                                                                                                                                                                       |
| Chimpanzee ( <b>Prado-Martinez et al., 2013</b> )* | <a href="http://www.biologiaevolutiva.org/greatape/data.html">http://www.biologiaevolutiva.org/greatape/data.html</a><br><a href="https://eichlerlab.gs.washington.edu/greatape/data/VCFs/SNPs/">https://eichlerlab.gs.washington.edu/greatape/data/VCFs/SNPs/</a> | Pan_troglodytes.vcf.gz                                                                                                                                                                                                         |

\*aligned against hg18: <http://hgdownload.cse.ucsc.edu/goldenPath/hg18/bigZips/>

\*\*aligned against hg19 (iGenome by Illumina): [http://support.illumina.com/sequencing/sequencing\\_software/igenome.html](http://support.illumina.com/sequencing/sequencing_software/igenome.html)

rs2218404

```
#####
# Program: stretcher
# Rundate: Thu 25 Dec 2014 08:13:17
# Commandline: stretcher
# -auto
# -stdout
# -asequence emboss_stretcher-I20141225-081316-0218-34995224-oy.asequence
# -bsequence emboss_stretcher-I20141225-081316-0218-34995224-oy.bsequence
# -datafile EDNAFULL
# -gapopen 16
# -gapextend 4
# -aformat3 pair
# -snucleotide1
# -snucleotide2
# Align_format: pair
# Report_file: stdout
#####
```

```
#=====
#
# Aligned_sequences: 2
# 1: EMBOSS_001
# 2: EMBOSS_001
# Matrix: EDNAFULL
# Gap_penalty: 16
# Extend_penalty: 4
#
# Length: 101
# Identity:      100/101 (99.0%)
# Similarity:    100/101 (99.0%)
# Gaps:          0/101 ( 0.0%)
# Score: 496
#
#
#=====
```

```
EMBOSS_001      1 GATTCCTTTCCCTCCAAAGGGCAAGAATTCACACGTAGACGACACTGCC      50
  |||
EMBOSS_001      1 GATTCCTTTCCCTCCAAAGGGCAAGAATTCACACGTAGACGACACTGCC      50

EMBOSS_001     51 TGTTCAGAGGGCACGGGAATGGGGTTTTCAAGGTGCAAGCCAGAGAAAA      100
  .|||
EMBOSS_001     51 GGTTCAGAGGGCACGGGAATGGGGTTTTCAAGGTGCAAGCCAGAGAAAA      100

EMBOSS_001     101 G      101
      |
EMBOSS_001     101 G      101
```

```
#-----
#-----
```



```
#####
# Program: stretcher
# Rundate: Thu 16 Oct 2014 08:26:46
# Commandline: stretcher
#   -auto
#   -stdout
#   -asequence emboss_stretcher-I20141016-082645-0369-18360949-es.asequence
#   -bsequence emboss_stretcher-I20141016-082645-0369-18360949-es.bsequence
#   -datafile EDNAFULL
#   -gapopen 16
#   -gapextend 4
#   -aformat3 pair
#   -snucleotide1
#   -snucleotide2
# Align_format: pair
# Report_file: stdout
#####
```

```
#=====
#
# Aligned_sequences: 2
# 1: EMBOSS_001
# 2: EMBOSS_001
# Matrix: EDNAFULL
# Gap_penalty: 16
# Extend_penalty: 4
#
# Length: 101
# Identity:      101/101 (100.0%)
# Similarity:    101/101 (100.0%)
# Gaps:          0/101 ( 0.0%)
# Score: 505
#
#
#=====
```

```
EMBOSS_001      1 GATTCCCTTTCCCCTCCAAAGGGCAAGAATTCACACGTAGACGACACTGCC      50
  |||
EMBOSS_001      1 GATTCCCTTTCCCCTCCAAAGGGCAAGAATTCACACGTAGACGACACTGCC      50

EMBOSS_001     51 TGTTCAGAGGGCACGGGAATGGGGTTTCAAGGTGCAAGCCAGAGAAAA      100
  |||
EMBOSS_001     51 TGTTCAGAGGGCACGGGAATGGGGTTTCAAGGTGCAAGCCAGAGAAAA      100

EMBOSS_001      101 G      101
      |
EMBOSS_001      101 G      101
```

```
#-----
#-----
```

```
#####
# Program: stretcher
# Rundate: Tue 28 Oct 2014 06:24:20
# Commandline: stretcher
# -auto
# -stdout
# -asequence emboss_stretcher-I20141028-062419-0722-91680158-es.asequence
# -bsequence emboss_stretcher-I20141028-062419-0722-91680158-es.bsequence
# -datafile EDNAFULL
# -gapopen 16
# -gapextend 4
# -aformat3 pair
# -snucleotide1
# -snucleotide2
# Align_format: pair
# Report_file: stdout
#####
```

```
#=====
#
# Aligned_sequences: 2
# 1: EMBOSS_001
# 2: EMBOSS_001
# Matrix: EDNAFULL
# Gap_penalty: 16
# Extend_penalty: 4
#
# Length: 101
# Identity:      101/101 (100.0%)
# Similarity:    101/101 (100.0%)
# Gaps:          0/101 ( 0.0%)
# Score: 505
#
#
#=====
```

```
EMBOSS_001      1 GATTCCCTTTCCCCTCCAAAGGGCAAGAATTCACACGTAGACGACACTGCC      50
  |||
EMBOSS_001      1 GATTCCCTTTCCCCTCCAAAGGGCAAGAATTCACACGTAGACGACACTGCC      50

EMBOSS_001     51 TGTTCAGAGGGCACGGGAATGGGGTTTCAAGGTGCAAGCCAGAGAAAA      100
  |||
EMBOSS_001     51 TGTTCAGAGGGCACGGGAATGGGGTTTCAAGGTGCAAGCCAGAGAAAA      100

EMBOSS_001      101 G      101
      |
EMBOSS_001      101 G      101
```

```
#-----
#-----
```

```
#####
# Program: stretcher
# Rundate: Thu 16 Oct 2014 08:29:25
# Commandline: stretcher
# -auto
# -stdout
# -asequence emboss_stretcher-I20141016-082924-0515-99795881-oy.asequence
# -bsequence emboss_stretcher-I20141016-082924-0515-99795881-oy.bsequence
# -datafile EDNAFULL
# -gapopen 16
# -gapextend 4
# -aformat3 pair
# -snucleotide1
# -snucleotide2
# Align_format: pair
# Report_file: stdout
#####
```

```
#=====
#
# Aligned_sequences: 2
# 1: EMBOSS_001
# 2: EMBOSS_001
# Matrix: EDNAFULL
# Gap_penalty: 16
# Extend_penalty: 4
#
# Length: 101
# Identity:      100/101 (99.0%)
# Similarity:   100/101 (99.0%)
# Gaps:         0/101 ( 0.0%)
# Score: 496
#
#
#=====
```

```
EMBOSS_001      1 GATTCCCTTTCCCCTCCAAGGGCAAGAATTCACACGTAGACGACACTGCC      50
  |||
EMBOSS_001      1 GATTCCCTTTCCCCTCCAAGGGCAAGAATTCACACGTAGACGACACTGCC      50

EMBOSS_001     51 TGTTCAGAGGGCACGGGAATGGGGTTTCAAGGTGCAAGCCAGAGAAAA      100
  .|||
EMBOSS_001     51 GGTTCAGAGGGCACGGGAATGGGGTTTCAAGGTGCAAGCCAGAGAAAA      100

EMBOSS_001     101 G      101
      |
EMBOSS_001     101 G      101
```

```
#-----
#-----
```

```
#####
# Program: stretcher
# Rundate: Sat 3 Jan 2015 09:12:00
# Commandline: stretcher
# -auto
# -stdout
# -asequence emboss_stretcher-I20150103-091159-0479-8403651-es.asequence
# -bsequence emboss_stretcher-I20150103-091159-0479-8403651-es.bsequence
# -datafile EDNAFULL
# -gapopen 16
# -gapextend 4
# -aformat3 pair
# -snucleotide1
# -snucleotide2
# Align_format: pair
# Report_file: stdout
#####
```

```
#=====
#
# Aligned_sequences: 2
# 1: EMBOSS_001
# 2: EMBOSS_001
# Matrix: EDNAFULL
# Gap_penalty: 16
# Extend_penalty: 4
#
# Length: 101
# Identity:      100/101 (99.0%)
# Similarity:    100/101 (99.0%)
# Gaps:          0/101 ( 0.0%)
# Score: 496
#
#
#=====
```

```
EMBOSS_001      1 GATTCCTTTCCCTCCAAAGGGCAAGAATTCACACGTAGACGACTGCC      50
  |||
EMBOSS_001      1 GATTCCTTTCCCTCCAAAGGGCAAGAATTCACACGTAGACGACTGCC      50

EMBOSS_001     51 TGTTCAGAGGGCACGGGAATGGGGTTTTCAAGGTGCAAGCCAGAGAAAA    100
  .|||
EMBOSS_001     51 GGTTCAGAGGGCACGGGAATGGGGTTTTCAAGGTGCAAGCCAGAGAAAA    100

EMBOSS_001     101 G      101
      |
EMBOSS_001     101 G      101
```

```
#-----
#-----
```

```
#####
# Program: stretcher
# Rundate: Thu 25 Dec 2014 12:05:56
# Commandline: stretcher
#   -auto
#   -stdout
#   -asequence emboss_stretcher-I20141225-120555-0779-82831793-es.asequence
#   -bsequence emboss_stretcher-I20141225-120555-0779-82831793-es.bsequence
#   -datafile EDNAFULL
#   -gapopen 16
#   -gapextend 4
#   -aformat3 pair
#   -snucleotide1
#   -snucleotide2
# Align_format: pair
# Report_file: stdout
#####
```

```
#=====
#
# Aligned_sequences: 2
# 1: EMBOSS_001
# 2: EMBOSS_001
# Matrix: EDNAFULL
# Gap_penalty: 16
# Extend_penalty: 4
#
# Length: 101
# Identity:      101/101 (100.0%)
# Similarity:   101/101 (100.0%)
# Gaps:         0/101 ( 0.0%)
# Score: 505
#
#
#=====
```

```
EMBOSS_001      1 GATTCCTTTCCCCTCCAAAGGGCAAGAATTCACACGTAGACGACACTGCC      50
  |||
EMBOSS_001      1 GATTCCTTTCCCCTCCAAAGGGCAAGAATTCACACGTAGACGACACTGCC      50

EMBOSS_001     51 TGTTCAGAGGGCACGGGAATGGGGTTTTCAAGGTGCAAGCCAGAGAAAA      100
  |||
EMBOSS_001     51 TGTTCAGAGGGCACGGGAATGGGGTTTTCAAGGTGCAAGCCAGAGAAAA      100

EMBOSS_001     101 G      101
      |
EMBOSS_001     101 G      101
```

```
#-----
#-----
```



```
#####
# Program: stretcher
# Rundate: Thu 8 Jan 2015 08:33:35
# Commandline: stretcher
# -auto
# -stdout
# -asequence emboss_stretcher-I20150108-083334-0026-50789204-oy.asequence
# -bsequence emboss_stretcher-I20150108-083334-0026-50789204-oy.bsequence
# -datafile EDNAFULL
# -gapopen 16
# -gapextend 4
# -aformat3 pair
# -snucleotide1
# -snucleotide2
# Align_format: pair
# Report_file: stdout
#####
```

```
#=====
#
# Aligned_sequences: 2
# 1: EMBOSS_001
# 2: EMBOSS_001
# Matrix: EDNAFULL
# Gap_penalty: 16
# Extend_penalty: 4
#
# Length: 101
# Identity:      0/101 ( 0.0%)
# Similarity:   0/101 ( 0.0%)
# Gaps:         0/101 ( 0.0%)
# Score: -202
#
#
#=====
```

```
EMBOSS_001      1 GATTCCTTTCCCTCCAAAGGGCAAGAATTCACACGTAGACGACACTGCC      50
                  .....
EMBOSS_001      1 NNNNNNNNNNNNNNNNNNNNNNNNNNNNNNNNNNNNNNNNNNNNNNNNNNNNNNN      50

EMBOSS_001     51 TGTTCAGAGGGCACGGGAATGGGGTTTCAAGGTGCAAGCCAGAGAAAA      100
                  .....
EMBOSS_001     51 NNNNNNNNNNNNNNNNNNNNNNNNNNNNNNNNNNNNNNNNNNNNNNNNNNNNNNN      100

EMBOSS_001     101 G      101
                  .
EMBOSS_001     101 N      101
```

```
#-----
#-----
```

```
#####
# Program: stretcher
# Rundate: Thu 16 Oct 2014 08:34:32
# Commandline: stretcher
# -auto
# -stdout
# -asequence emboss_stretcher-I20141016-083431-0426-76127058-pg.asequence
# -bsequence emboss_stretcher-I20141016-083431-0426-76127058-pg.bsequence
# -datafile EDNAFULL
# -gapopen 16
# -gapextend 4
# -aformat3 pair
# -snucleotide1
# -snucleotide2
# Align_format: pair
# Report_file: stdout
#####
```

```
#=====
#
# Aligned_sequences: 2
# 1: EMBOSS_001
# 2: EMBOSS_001
# Matrix: EDNAFULL
# Gap_penalty: 16
# Extend_penalty: 4
#
# Length: 101
# Identity:      94/101 (93.1%)
# Similarity:    94/101 (93.1%)
# Gaps:          0/101 ( 0.0%)
# Score: 456
#
#
#=====
```

```
EMBOSS_001      1 GATTCCCTTTCCCCTCCAAAGGGCAAGAATTCACACGTAGACGACACTGCC      50
  |||
EMBOSS_001      1 GATTCCCTTTCCCCTCCAAAGGGCAAGAATTCACACGTAGACGACACTGCC      50

EMBOSS_001     51 TGTTCAGAGGGCACGGGAATGGGGTTTCAAGGTGCAAGCCAGAGAAAA      100
  |||
EMBOSS_001     51 TGTTCAGAGGGCACGGGAATGGGGTTTCAAGGTGCAAGCCAGNNNNNN      100

EMBOSS_001     101 G      101
      .
EMBOSS_001     101 N      101
```

```
#-----
#-----
```



```
#####
# Program: stretcher
# Rundate: Tue 28 Oct 2014 09:18:59
# Commandline: stretcher
# -auto
# -stdout
# -asequence emboss_stretcher-I20141028-091858-0373-92108860-es.asequence
# -bsequence emboss_stretcher-I20141028-091858-0373-92108860-es.bsequence
# -datafile EDNAFULL
# -gapopen 16
# -gapextend 4
# -aformat3 pair
# -snucleotide1
# -snucleotide2
# Align_format: pair
# Report_file: stdout
#####
```

```
#=====
#
# Aligned_sequences: 2
# 1: EMBOSS_001
# 2: EMBOSS_001
# Matrix: EDNAFULL
# Gap_penalty: 16
# Extend_penalty: 4
#
# Length: 101
# Identity:      101/101 (100.0%)
# Similarity:    101/101 (100.0%)
# Gaps:          0/101 ( 0.0%)
# Score: 505
#
#
#=====
```

```
EMBOSS_001      1  GATTCCCTTTCCCCTCCAAAGGGCAAGAATTCACACGTAGACGACACTGCC      50
  |||
EMBOSS_001      1  GATTCCCTTTCCCCTCCAAAGGGCAAGAATTCACACGTAGACGACACTGCC      50

EMBOSS_001     51  TGTTCAGAGGGCACGGGAATGGGGTTTCAAGGTGCAAGCCAGAGAAAA      100
  |||
EMBOSS_001     51  TGTTCAGAGGGCACGGGAATGGGGTTTCAAGGTGCAAGCCAGAGAAAA      100

EMBOSS_001      101 G      101
  |
EMBOSS_001      101 G      101
```

```
#-----
#-----
```

```
#####
# Program: stretcher
# Rundate: Thu 16 Oct 2014 08:32:22
# Commandline: stretcher
# -auto
# -stdout
# -asequence emboss_stretcher-I20141016-083220-0994-81694243-oy.asequence
# -bsequence emboss_stretcher-I20141016-083220-0994-81694243-oy.bsequence
# -datafile EDNAFULL
# -gapopen 16
# -gapextend 4
# -aformat3 pair
# -snucleotide1
# -snucleotide2
# Align_format: pair
# Report_file: stdout
#####
```

```
#=====
#
# Aligned_sequences: 2
# 1: EMBOSS_001
# 2: EMBOSS_001
# Matrix: EDNAFULL
# Gap_penalty: 16
# Extend_penalty: 4
#
# Length: 101
# Identity:      101/101 (100.0%)
# Similarity:   101/101 (100.0%)
# Gaps:         0/101 ( 0.0%)
# Score: 505
#
#
#=====
```

```
EMBOSS_001      1 GATTCCCTTTCCCCTCCAAAGGGCAAGAATTCACACGTAGACGACACTGCC      50
  |||
EMBOSS_001      1 GATTCCCTTTCCCCTCCAAAGGGCAAGAATTCACACGTAGACGACACTGCC      50

EMBOSS_001     51 TGTTCAGAGGGCACGGGAATGGGGTTTCAAGGTGCAAGCCAGAGAAAA      100
  |||
EMBOSS_001     51 TGTTCAGAGGGCACGGGAATGGGGTTTCAAGGTGCAAGCCAGAGAAAA      100

EMBOSS_001      101 G      101
      |
EMBOSS_001      101 G      101
```

```
#-----
#-----
```



```
#####
# Program: stretcher
# Rundate: Wed 14 Jan 2015 05:09:35
# Commandline: stretcher
# -auto
# -stdout
# -asequence emboss_stretcher-I20150114-050934-0543-88323379-es.asequence
# -bsequence emboss_stretcher-I20150114-050934-0543-88323379-es.bsequence
# -datafile EDNAFULL
# -gapopen 16
# -gapextend 4
# -aformat3 pair
# -snucleotide1
# -snucleotide2
# Align_format: pair
# Report_file: stdout
#####
```

```
#=====
#
# Aligned_sequences: 2
# 1: EMBOSS_001
# 2: EMBOSS_001
# Matrix: EDNAFULL
# Gap_penalty: 16
# Extend_penalty: 4
#
# Length: 101
# Identity:      96/101 (95.0%)
# Similarity:   96/101 (95.0%)
# Gaps:         0/101 ( 0.0%)
# Score: 460
#
#
#=====
```

```
EMBOSS_001      1 GATTCCTTTCCCTCCAAAGGGCAAGAATTCACACGTAGACGACACTGCC      50
  |||...|.|||||...|.|||||...|.|||||...|.|||||...|.|||||...|.
EMBOSS_001      1 GATTCCTTTCTCTCCAAAGGGCAAGAATTCACACATAGATGACACTGCC      50

EMBOSS_001     51 TGTTCAGAGGGCACGGGAATGGGGTTTTCAAGGTGCAAGCCAGAGAAAA      100
  |||...|.|||||...|.|||||...|.|||||...|.|||||...|.|||||...|.
EMBOSS_001     51 TGTTCAGAGGGCACAGGAATGGGGTTTTCAAGGTGCAAGCCAGAGAAAA      100

EMBOSS_001     101 G      101
      |
EMBOSS_001     101 G      101
```

```
#-----
#-----
```

|   |      |                                                      |      |
|---|------|------------------------------------------------------|------|
| 7 | 1642 | GATGGATGGAAAAGTAGTTCCTTTGGCGTTGGGGTGTCTTTCTGTTTGAAG  | 1691 |
|   | 1686 | TGTCAGTTGTATGTTGCATGGCCCTCTAACTGTACTGCTCACTCGACAT    | 1735 |
| 7 | 1692 | TGTCAGTTGTATGTTGCATGGCCCTCTAACTGTCTGCTCACTCGACAT     | 1741 |
|   | 1736 | CCCATTTCGGCCGCCTCCACCACATCCCCATATCTGAGCATCAGCAGATG   | 1785 |
| 7 | 1742 | CCCATTTCGGCCGCCTCCACTACATCCCCATCTTTGAGCATCAGCAGATG   | 1791 |
|   | 1786 | TTGACCTTTTACACATCAAATCAGGAAATTTCTGTTTTGTTTTGTTTTGT   | 1835 |
| 7 | 1792 | TTGACCTTTTACACACCAAATCCGGACATTTCTGTTTTGTTTTGTTTTG-   | 1840 |
|   | 1836 | TTTGTTTTGAATCAGTGGTGACCTGAAAGGATGCTTCGTTGTGCCTTTG    | 1885 |
| 7 | 1841 | -----AAATCAGTGGTGACCTGAAAGGATGCTTCATTGTGCCTTTG       | 1881 |
|   | 1886 | AAAAAATATATTAACCTTTATTATCGAGAACCTAGGAAAATTTACTCCT    | 1935 |
| 7 | 1882 | AAAAAACG-TATTAACCTTTATTATCAAGAACCTAGGAAAATTTACTCCT   | 1930 |
|   | 1936 | AATAAAAACCTCTGACTAAAAGTGATATTTGGACTCTCCCTTCAATAT     | 1985 |
| 7 | 1931 | AATAAAAACCTCTGACTAAAAGTGATATTCAGACCCTGCCTTCGATAT     | 1980 |
|   | 1986 | GCCTCTGGCTGTTCCGCTTAGAATGCAATGGGTATTTTCTCAGATTTCCA   | 2035 |
| 7 | 1981 | GCCTCTGGCTGTTCTGCTTAGAATGCAATGGGTATTTTCTCAGATTTCCA   | 2030 |
|   | 2036 | GCAAACAGGATGTAAGAGCTTCCAGAGGTCACCCAACATCACACATGACT   | 2085 |
| 7 | 2031 | GCAAGCAGGATGTAAGAGCTTCCAGAGGTCACCCAACATCACACATGACT   | 2080 |
|   | 2086 | AGCTTACCTGTTTCTGGCTTTTAAGGTAAAGAG--TTACAGTAAAACCA    | 2133 |
| 7 | 2081 | AGCTTGCCTGTTGCCTGGCTTTTAAGGTAAAGAGATTACAGTAAAACCA    | 2130 |
|   | 2134 | TCAAACGTGATTGTATCTTCTAGGCTGCTTTAATGGCATTTCGAAAGTTCC  | 2183 |
| 7 | 2131 | TCACACATGATTGTATCTTCTAGGCTGCTTTAATGGCATTTCGAAAGTTCC  | 2180 |
|   | 2184 | TTCTTTGTGGGCTTATAAGTTGCTTTTTCGCGTCACTCGTGGATTCCCTTT  | 2233 |
| 7 | 2181 | TTCTTTGTGGGCTTATAAGTTGCTTTGCTGTGTGCACTCGTGGATTCCCTTT | 2230 |
|   | 2234 | CCCCTCCAAAGGGCAAGAATTCACACGTAGACGACTGCC---TGTTCC     | 2280 |
| 7 | 2231 | CCTCTGCAAAGGGCAAGAATTCACACGTAGATGACTGCGCCTGTTTC      | 2280 |
|   | 2281 | AGAGGGCACGGGAATGGGGTTTTCAAGGTGCAAGCCAGAGAAAAGGAAGC   | 2330 |
| 7 | 2281 | AGAGGGCACAGGAATGGGGTTTTCAAGGTGCAAGCCAGAGTAGAGGAAGC   | 2330 |
|   | 2331 | TGTTTGGATATTTAGCTAAGTTATGGGTGTTTGCCAGTGCTTTTTGCATT   | 2380 |
| 7 | 2331 | TGTTTAGATATTTAGCTAAGTTATGGGAGTTTGCCAGGGCTTTTTTCATT   | 2380 |
|   | 2381 | ACCCCAAAGAAGGAATCAATGACTATAATTCCACTAACTATATAGAAAGA   | 2430 |
| 7 | 2381 | ACCCCAAAGAAGGAATAAATGAATATAAATTCACTAACTGTATATAAAGA   | 2430 |
|   | 2431 | TACCATTATAGCAGATGTAACACCCCTGAGACCCCGATTATCACAGCATA   | 2480 |









rs1373336

```
#####
# Program: stretcher
# Rundate: Wed 14 Jan 2015 06:02:14
# Commandline: stretcher
#   -auto
#   -stdout
#   -asequence emboss_stretcher-I20150114-060213-0179-29738608-pg.asequence
#   -bsequence emboss_stretcher-I20150114-060213-0179-29738608-pg.bsequence
#   -datafile EDNAFULL
#   -gapopen 16
#   -gapextend 4
#   -aformat3 pair
#   -snucleotide1
#   -snucleotide2
# Align_format: pair
# Report_file: stdout
#####
```

```
#=====
#
# Aligned_sequences: 2
# 1: EMBOSS_001
# 2: EMBOSS_001
# Matrix: EDNAFULL
# Gap_penalty: 16
# Extend_penalty: 4
#
# Length: 101
# Identity:      32/101 (31.7%)
# Similarity:   32/101 (31.7%)
# Gaps:         69/101 (68.3%)
# Score: -128
#
#
#=====
```

```
EMBOSS_001      1 TTTATTGTCAACTTACACACTTAAACAGTAAAAAAAAAATTACAGTTT      50
                  |||
EMBOSS_001      1 TTTATTGTCAACTTACACAC-----                          20

EMBOSS_001     51 CGATATAGGTACAAATTTATAATGTGCCTATGTACAGACAAACATTAAAA      100
                                     |||
EMBOSS_001     21 -----AAACATTAAAA                                  31

EMBOSS_001     101 G      101
                   |
EMBOSS_001     32 G      32
```

```
#-----
#-----
```







```
#####
# Program: stretcher
# Rundate: Sat 3 Jan 2015 09:14:45
# Commandline: stretcher
# -auto
# -stdout
# -asequence emboss_stretcher-I20150103-091444-0674-82049209-pg.asequence
# -bsequence emboss_stretcher-I20150103-091444-0674-82049209-pg.bsequence
# -datafile EDNAFULL
# -gapopen 16
# -gapextend 4
# -aformat3 pair
# -snucleotide1
# -snucleotide2
# Align_format: pair
# Report_file: stdout
#####
```

```
#=====
#
# Aligned_sequences: 2
# 1: EMBOSS_001
# 2: EMBOSS_001
# Matrix: EDNAFULL
# Gap_penalty: 16
# Extend_penalty: 4
#
# Length: 101
# Identity: 100/101 (99.0%)
# Similarity: 100/101 (99.0%)
# Gaps: 0/101 ( 0.0%)
# Score: 498
#
#
#=====
```

```
EMBOSS_001      1 TTTATTGTCAACTTACACACTTTAAACAGTAAAAAAAAAAATTACAGTTT      50
  |||
EMBOSS_001      1 TTTATTGTCAACTTACACACTTTAAACAGTAAAAAAAAAAATTACAGTTT      50

EMBOSS_001     51 CGATATAGGTACAAATTTATAATGTGCCTATGTACAGACAAACATTAAAA      100
  .|||
EMBOSS_001     51 NGATATAGGTACAAATTTATAATGTGCCTATGTACAGACAAACATTAAAA      100

EMBOSS_001     101 G      101
      |
EMBOSS_001     101 G      101
```

```
#-----
#-----
```

```
#####
# Program: stretcher
# Rundate: Fri 26 Dec 2014 07:32:30
# Commandline: stretcher
#   -auto
#   -stdout
#   -asequence emboss_stretcher-I20141226-073229-0696-19006322-oy.asequence
#   -bsequence emboss_stretcher-I20141226-073229-0696-19006322-oy.bsequence
#   -datafile EDNAFULL
#   -gapopen 16
#   -gapextend 4
#   -aformat3 pair
#   -snucleotide1
#   -snucleotide2
# Align_format: pair
# Report_file: stdout
#####
```

```
#=====
#
# Aligned_sequences: 2
# 1: EMBOSS_001
# 2: EMBOSS_001
# Matrix: EDNAFULL
# Gap_penalty: 16
# Extend_penalty: 4
#
# Length: 101
# Identity:      56/101 (55.4%)
# Similarity:   56/101 (55.4%)
# Gaps:         0/101 ( 0.0%)
# Score: 190
#
#
#=====
```

```
EMBOSS_001      1 TTTATTGTCAACTTACACACTTTAAACAGTAAAAAAAAAATTACAGTTT      50
  |||
EMBOSS_001      1 TTTATTGTCAACTTACACACTTTAAACAGNNNNNNNNNNNNNNNNNNNN      50

EMBOSS_001     51 CGATATAGGTACAAATTTATAATGTGCCTATGTACAGACAAACATTAAAA    100
  .....|
EMBOSS_001     51 NNNNNNNNNNNNNNNNNNNNNNNNNNTGCCTATGTACAGACAAACATTAAAA    100

EMBOSS_001     101 G      101
      |
EMBOSS_001     101 G      101
```

```
#-----
#-----
```









```
#####
# Program: stretcher
# Rundate: Tue 28 Oct 2014 09:38:07
# Commandline: stretcher
# -auto
# -stdout
# -asequence emboss_stretcher-I20141028-093806-0554-89863933-es.asequence
# -bsequence emboss_stretcher-I20141028-093806-0554-89863933-es.bsequence
# -datafile EDNAFULL
# -gapopen 16
# -gapextend 4
# -aformat3 pair
# -snucleotide1
# -snucleotide2
# Align_format: pair
# Report_file: stdout
#####
```

```
#=====
#
# Aligned_sequences: 2
# 1: EMBOSS_001
# 2: EMBOSS_001
# Matrix: EDNAFULL
# Gap_penalty: 16
# Extend_penalty: 4
#
# Length: 101
# Identity:      101/101 (100.0%)
# Similarity:    101/101 (100.0%)
# Gaps:          0/101 ( 0.0%)
# Score: 505
#
#
#=====
```

```
EMBOSS_001      1 TTTATTGTCAACTTACACACTTTAAACAGTAAAAAAAAAAATTACAGTTT      50
|
EMBOSS_001      1 TTTATTGTCAACTTACACACTTTAAACAGTAAAAAAAAAAATTACAGTTT      50

EMBOSS_001     51 CGATATAGGTACAAATTTATAATGTGCCTATGTACAGACAAACATTAAAA      100
|
EMBOSS_001     51 CGATATAGGTACAAATTTATAATGTGCCTATGTACAGACAAACATTAAAA      100

EMBOSS_001     101 G      101
|
EMBOSS_001     101 G      101
```

```
#-----
#-----
```

```
#####
# Program: stretcher
# Rundate: Fri 17 Oct 2014 09:02:30
# Commandline: stretcher
# -auto
# -stdout
# -asequence emboss_stretcher-I20141017-090220-0474-58307313-pg.asequence
# -bsequence emboss_stretcher-I20141017-090220-0474-58307313-pg.bsequence
# -datafile EDNAFULL
# -gapopen 16
# -gapextend 4
# -aformat3 pair
# -snucleotide1
# -snucleotide2
# Align_format: pair
# Report_file: stdout
#####
```

```
#=====
#
# Aligned_sequences: 2
# 1: EMBOSS_001
# 2: EMBOSS_001
# Matrix: EDNAFULL
# Gap_penalty: 16
# Extend_penalty: 4
#
# Length: 101
# Identity:      101/101 (100.0%)
# Similarity:   101/101 (100.0%)
# Gaps:         0/101 ( 0.0%)
# Score: 505
#
#
#=====
```

```
EMBOSS_001      1 TTTATTGTCAACTTACACACTTTAAACAGTAAAAAAAAAAATTACAGTTT      50
|
EMBOSS_001      1 TTTATTGTCAACTTACACACTTTAAACAGTAAAAAAAAAAATTACAGTTT      50

EMBOSS_001     51 CGATATAGGTACAAATTTATAATGTGCCTATGTACAGACAAACATTAAAA     100
|
EMBOSS_001     51 CGATATAGGTACAAATTTATAATGTGCCTATGTACAGACAAACATTAAAA     100

EMBOSS_001     101 G      101
|
EMBOSS_001     101 G      101
```

```
#-----
#-----
```

```
#####
# Program: stretcher
# Rundate: Sat 15 Nov 2014 04:50:49
# Commandline: stretcher
#   -auto
#   -stdout
#   -asequence emboss_stretcher-I20141115-045047-0948-55454092-oy.asequence
#   -bsequence emboss_stretcher-I20141115-045047-0948-55454092-oy.bsequence
#   -datafile EDNAFULL
#   -gapopen 16
#   -gapextend 4
#   -aformat3 pair
#   -snucleotide1
#   -snucleotide2
# Align_format: pair
# Report_file: stdout
#####
```

```
#=====
#
# Aligned_sequences: 2
# 1: EMBOSS_001
# 2: EMBOSS_001
# Matrix: EDNAFULL
# Gap_penalty: 16
# Extend_penalty: 4
#
# Length: 101
# Identity:      0/101 ( 0.0%)
# Similarity:   0/101 ( 0.0%)
# Gaps:         0/101 ( 0.0%)
# Score: -202
#
#
#=====
```

```
EMBOSS_001      1 TTTATTGTCAACTTACACACTTTAAACAGTAAAAAAAAAAATTACAGTTT      50
.....
EMBOSS_001      1 NNNNNNNNNNNNNNNNNNNNNNNNNNNNNNNNNNNNNNNNNNNNNNNNNNNNNNN      50

EMBOSS_001     51 CGATATAGGTACAAATTTATAATGTGCCTATGTACAGACAAACATTAAAA      100
.....
EMBOSS_001     51 NNNNNNNNNNNNNNNNNNNNNNNNNNNNNNNNNNNNNNNNNNNNNNNNNNNNNNN      100

EMBOSS_001     101 G      101
.
EMBOSS_001     101 N      101
```

```
#-----
#-----
```

```
#####
# Program: stretcher
# Rundate: Mon 12 Jan 2015 08:56:40
# Commandline: stretcher
#   -auto
#   -stdout
#   -asequence emboss_stretcher-I20150112-085639-0452-25072749-es.asequence
#   -bsequence emboss_stretcher-I20150112-085639-0452-25072749-es.bsequence
#   -datafile EDNAFULL
#   -gapopen 16
#   -gapextend 4
#   -aformat3 pair
#   -snucleotide1
#   -snucleotide2
# Align_format: pair
# Report_file: stdout
#####
```

```
#=====
#
# Aligned_sequences: 2
# 1: EMBOSS_001
# 2: EMBOSS_001
# Matrix: EDNAFULL
# Gap_penalty: 16
# Extend_penalty: 4
#
# Length: 101
# Identity:      100/101 (99.0%)
# Similarity:   100/101 (99.0%)
# Gaps:         0/101 ( 0.0%)
# Score: 496
#
#
#=====
```

```
EMBOSS_001      1 TTTATTGTCAACTTACACACTTTAAACAGTAAAAAAAAAATTACAGTTT      50
  |||
EMBOSS_001      1 TTTATTGTCAACTTACACACTTTAAACAGTAAAAAAAAAATTACAATTT      50

EMBOSS_001     51 CGATATAGGTACAAATTTATAATGTGCCTATGTACAGACAAACATTAAAA      100
  |||
EMBOSS_001     51 CGATATAGGTACAAATTTATAATGTGCCTATGTACAGACAAACATTAAAA      100

EMBOSS_001     101 G      101
      |
EMBOSS_001     101 G      101
```

```
#-----
#-----
```











rs1444042

```
#####
# Program: stretcher
# Rundate: Wed 14 Jan 2015 06:06:04
# Commandline: stretcher
#   -auto
#   -stdout
#   -asequence emboss_stretcher-I20150114-060603-0575-23860271-es.asequence
#   -bsequence emboss_stretcher-I20150114-060603-0575-23860271-es.bsequence
#   -datafile EDNAFULL
#   -gapopen 16
#   -gapextend 4
#   -aformat3 pair
#   -snucleotide1
#   -snucleotide2
# Align_format: pair
# Report_file: stdout
#####
```

```
#=====
#
# Aligned_sequences: 2
# 1: EMBOSS_001
# 2: EMBOSS_001
# Matrix: EDNAFULL
# Gap_penalty: 16
# Extend_penalty: 4
#
# Length: 101
# Identity:      42/101 (41.6%)
# Similarity:    42/101 (41.6%)
# Gaps:          59/101 (58.4%)
# Score: -38
#
#
#=====
```

```
EMBOSS_001      1 CCAATGGACTTAGCCTATGTGTTAACCCATATCTTTATCATGAAAATCA      50
                |||
EMBOSS_001      1 CCAATGGACTTAG-----                                     13

EMBOSS_001     51 ATAATATGGACAACACTACTATGTTCCACAGATGTTGAATGCAAAAAGACA     100
                |||
EMBOSS_001     14 -----TCCACAGATGTTGAATGCAAAAAGACA      41

EMBOSS_001     101 A      101
                |
EMBOSS_001     42 A      42
```

```
#-----
#-----
```



```
#####
# Program: stretcher
# Rundate: Wed 11 Mar 2015 08:55:19
# Commandline: stretcher
#   -auto
#   -stdout
#   -asequence emboss_stretcher-I20150311-085517-0977-25266201-es.asequence
#   -bsequence emboss_stretcher-I20150311-085517-0977-25266201-es.bsequence
#   -datafile EDNAFULL
#   -gapopen 16
#   -gapextend 4
#   -aformat3 pair
#   -snucleotide1
#   -snucleotide2
# Align_format: pair
# Report_file: stdout
#####
```

```
#=====
#
# Aligned_sequences: 2
# 1: EMBOSS_001
# 2: EMBOSS_001
# Matrix: EDNAFULL
# Gap_penalty: 16
# Extend_penalty: 4
#
# Length: 101
# Identity:      89/101 (88.1%)
# Similarity:    89/101 (88.1%)
# Gaps:          0/101 ( 0.0%)
# Score: 421
#
#
#=====
```

```
EMBOSS_001      1 CCAATGGACTTAGCCTATGTGTTAACCCATATTCCTTATCATGAAAATCA      50
  |||
EMBOSS_001      1 CCAATGGACTTAGCCTATGTGTTAACCCANNNNNNNNNNNNTGAAAATCA      50
  |||

EMBOSS_001     51 ATAATATGGACAACACTACTATGTTCCACAGATGTTGAATGCAAAAAGACA     100
  |||
EMBOSS_001     51 ATAATATGGACAACACTACTATGTTCCACAGATGTTGAATGCAAAAAGACA     100
  |||

EMBOSS_001     101 A      101
      |
EMBOSS_001     101 A      101
```

```
#-----
#-----
```



```
#####
# Program: stretcher
# Rundate: Sat 3 Jan 2015 09:17:54
# Commandline: stretcher
# -auto
# -stdout
# -asequence emboss_stretcher-I20150103-091753-0004-8695705-oy.asequence
# -bsequence emboss_stretcher-I20150103-091753-0004-8695705-oy.bsequence
# -datafile EDNAFULL
# -gapopen 16
# -gapextend 4
# -aformat3 pair
# -snucleotide1
# -snucleotide2
# Align_format: pair
# Report_file: stdout
#####
```

```
#=====
#
# Aligned_sequences: 2
# 1: EMBOSS_001
# 2: EMBOSS_001
# Matrix: EDNAFULL
# Gap_penalty: 16
# Extend_penalty: 4
#
# Length: 101
# Identity: 101/101 (100.0%)
# Similarity: 101/101 (100.0%)
# Gaps: 0/101 ( 0.0%)
# Score: 505
#
#
#=====
```

```
EMBOSS_001      1 CCAATGGACTTAGCCTATGTGTTAACCCATATTCCTTATCATGAAAATCA      50
  |||
EMBOSS_001      1 CCAATGGACTTAGCCTATGTGTTAACCCATATTCCTTATCATGAAAATCA      50

EMBOSS_001     51 ATAATATGGACAACACTACTATGTTCCACAGATGTTGAATGCAAAAAGACA     100
  |||
EMBOSS_001     51 ATAATATGGACAACACTACTATGTTCCACAGATGTTGAATGCAAAAAGACA     100

EMBOSS_001     101 A      101
      |
EMBOSS_001     101 A      101
```

```
#-----
#-----
```



```
#####
# Program: stretcher
# Rundate: Fri 26 Dec 2014 07:38:12
# Commandline: stretcher
#   -auto
#   -stdout
#   -asequence emboss_stretcher-I20141226-073811-0564-53257594-oy.asequence
#   -bsequence emboss_stretcher-I20141226-073811-0564-53257594-oy.bsequence
#   -datafile EDNAFULL
#   -gapopen 16
#   -gapextend 4
#   -aformat3 pair
#   -snucleotide1
#   -snucleotide2
# Align_format: pair
# Report_file: stdout
#####
```

```
#=====
#
# Aligned_sequences: 2
# 1: EMBOSS_001
# 2: EMBOSS_001
# Matrix: EDNAFULL
# Gap_penalty: 16
# Extend_penalty: 4
#
# Length: 101
# Identity:      101/101 (100.0%)
# Similarity:   101/101 (100.0%)
# Gaps:         0/101 ( 0.0%)
# Score: 505
#
#
#=====
```

```
EMBOSS_001      1 CCAATGGACTTAGCCTATGTGTTAACCCATATTCCTTATCATGAAAATCA      50
  |||
EMBOSS_001      1 CCAATGGACTTAGCCTATGTGTTAACCCATATTCCTTATCATGAAAATCA      50

EMBOSS_001     51 ATAATATGGACAACACTACTATGTTCCACAGATGTTGAATGCAAAAAGACA     100
  |||
EMBOSS_001     51 ATAATATGGACAACACTACTATGTTCCACAGATGTTGAATGCAAAAAGACA     100

EMBOSS_001     101 A      101
      |
EMBOSS_001     101 A      101
```

```
#-----
#-----
```

```
#####
# Program: stretcher
# Rundate: Wed 11 Mar 2015 08:58:29
# Commandline: stretcher
#   -auto
#   -stdout
#   -asequence emboss_stretcher-I20150311-085828-0180-35124358-oy.asequence
#   -bsequence emboss_stretcher-I20150311-085828-0180-35124358-oy.bsequence
#   -datafile EDNAFULL
#   -gapopen 16
#   -gapextend 4
#   -aformat3 pair
#   -snucleotide1
#   -snucleotide2
# Align_format: pair
# Report_file: stdout
#####
```

```
#=====
#
# Aligned_sequences: 2
# 1: EMBOSS_001
# 2: EMBOSS_001
# Matrix: EDNAFULL
# Gap_penalty: 16
# Extend_penalty: 4
#
# Length: 101
# Identity:      30/101 (29.7%)
# Similarity:   30/101 (29.7%)
# Gaps:         0/101 ( 0.0%)
# Score: 8
#
#
#=====
```

```
EMBOSS_001      1 CCAATGGACTTAGCCTATGTGTTAACCCATATTCCTTATCATGAAAATCA      50
                |||
EMBOSS_001      1 CCAATGGACTTAGCCTATGTGTTAACCCATNNNNNNNNNNNNNNNNNNNN      50

EMBOSS_001     51 ATAATATGGACAACACTACTATGTTCCACAGATGTTGAATGCAAAAAGACA     100
                .....
EMBOSS_001     51 NNNNNNNNNNNNNNNNNNNNNNNNNNNNNNNNNNNNNNNNNNNNNNNNNNNNN     100

EMBOSS_001     101 A      101
                .
EMBOSS_001     101 N      101
```

```
#-----
#-----
```





```
#####
# Program: stretcher
# Rundate: Tue 28 Oct 2014 09:45:34
# Commandline: stretcher
#   -auto
#   -stdout
#   -asequence emboss_stretcher-I20141028-094533-0961-67636483-pg.asequence
#   -bsequence emboss_stretcher-I20141028-094533-0961-67636483-pg.bsequence
#   -datafile EDNAFULL
#   -gapopen 16
#   -gapextend 4
#   -aformat3 pair
#   -snucleotide1
#   -snucleotide2
# Align_format: pair
# Report_file: stdout
#####
```

```
#=====
#
# Aligned_sequences: 2
# 1: EMBOSS_001
# 2: EMBOSS_001
# Matrix: EDNAFULL
# Gap_penalty: 16
# Extend_penalty: 4
#
# Length: 101
# Identity:      101/101 (100.0%)
# Similarity:   101/101 (100.0%)
# Gaps:         0/101 ( 0.0%)
# Score: 505
#
#
#=====
```

```
EMBOSS_001      1 CCAATGGACTTAGCCTATGTGTTAACCCATATTCCTTTATCATGAAAATCA      50
  |||
EMBOSS_001      1 CCAATGGACTTAGCCTATGTGTTAACCCATATTCCTTTATCATGAAAATCA      50

EMBOSS_001     51 ATAATATGGACAACACTACTATGTTCCACAGATGTTGAATGCAAAAAGACA     100
  |||
EMBOSS_001     51 ATAATATGGACAACACTACTATGTTCCACAGATGTTGAATGCAAAAAGACA     100

EMBOSS_001     101 A      101
      |
EMBOSS_001     101 A      101
```

```
#-----
#-----
```

```
#####
# Program: stretcher
# Rundate: Mon 20 Oct 2014 10:29:27
# Commandline: stretcher
#   -auto
#   -stdout
#   -asequence emboss_stretcher-I20141020-102926-0333-49917316-es.asequence
#   -bsequence emboss_stretcher-I20141020-102926-0333-49917316-es.bsequence
#   -datafile EDNAFULL
#   -gapopen 16
#   -gapextend 4
#   -aformat3 pair
#   -snucleotide1
#   -snucleotide2
# Align_format: pair
# Report_file: stdout
#####
```

```
#=====
#
# Aligned_sequences: 2
# 1: EMBOSS_001
# 2: EMBOSS_001
# Matrix: EDNAFULL
# Gap_penalty: 16
# Extend_penalty: 4
#
# Length: 101
# Identity:      101/101 (100.0%)
# Similarity:    101/101 (100.0%)
# Gaps:          0/101 ( 0.0%)
# Score: 505
#
#
#=====
```

```
EMBOSS_001      1 CCAATGGACTTAGCCTATGTGTTAACCCATATTCCTTTATCATGAAAATCA      50
  |||
EMBOSS_001      1 CCAATGGACTTAGCCTATGTGTTAACCCATATTCCTTTATCATGAAAATCA      50

EMBOSS_001     51 ATAATATGGACAACACTACTATGTTCCACAGATGTTGAATGCAAAAAGACA     100
  |||
EMBOSS_001     51 ATAATATGGACAACACTACTATGTTCCACAGATGTTGAATGCAAAAAGACA     100

EMBOSS_001      101 A      101
      |
EMBOSS_001      101 A      101
```

```
#-----
#-----
```



```
#####
# Program: stretcher
# Rundate: Tue 13 Jan 2015 04:50:51
# Commandline: stretcher
#   -auto
#   -stdout
#   -asequence emboss_stretcher-I20150113-045050-0887-44018081-oy.asequence
#   -bsequence emboss_stretcher-I20150113-045050-0887-44018081-oy.bsequence
#   -datafile EDNAFULL
#   -gapopen 16
#   -gapextend 4
#   -aformat3 pair
#   -snucleotide1
#   -snucleotide2
# Align_format: pair
# Report_file: stdout
#####
```

```
#=====
#
# Aligned_sequences: 2
# 1: EMBOSS_001
# 2: EMBOSS_001
# Matrix: EDNAFULL
# Gap_penalty: 16
# Extend_penalty: 4
#
# Length: 101
# Identity:      99/101 (98.0%)
# Similarity:   99/101 (98.0%)
# Gaps:         0/101 ( 0.0%)
# Score: 487
#
#
#=====
```

```
EMBOSS_001      1 CCAATGGACTTAGCCTATGTGTTAACCCATATTCCTTATCATGAAAATCA      50
                  ||.||||||||||||||||||||||||||||||||||||||.|||||||||||||
EMBOSS_001      1 CCTATGGACTTAGCCTATGTGTTAACCCATATTCCTTATCATGAAAATCA      50

EMBOSS_001     51 ATAATATGGACAACACTACTATGTTCCACAGATGTTGAATGCAAAAAGACA     100
                  |||||||||||||||||||||||||||||||||||||||||||||||||||
EMBOSS_001     51 ATAATATGGACAACACTACTATGTTCCACAGATGTTGAATGCAAAAAGACA     100

EMBOSS_001     101 A      101
                       |
EMBOSS_001     101 A      101
```

```
#-----
#-----
```



```

EMBOSS_001    10120 TGCTCTGCCTCCG-CCTTAATCTTTGACTG-----GTTAGCAGTCA    10159
      |||||.|.|||.|||.|.|||.|.|||||.|||.|.|||||
EMBOSS_001    10264 TGCTCTGTCTCTAACCTTATTGTTTGACTCATCCTCATAGTTAGCAGTCA    10313
EMBOSS_001    10160 AGATCATCCAGACACTGCTGGATGCTCATTTTTAAACAGAAAACAATTGCT    10209
      |||||.|.|||.|||.|.|||.|.|||||.|||.|.|||||
EMBOSS_001    10314 AGATCATCCAGACATTTTGGATGCTCATT--AATAGAAAACAATTGCT    10361
EMBOSS_001    10210 AAGATATATTTTAAACAATATTCTTTCCCTTATTCTGCAAAAGCATAGGA    10259
      |||||.|.|||.|||.|.|||.|.|||||.|||.|.|||||
EMBOSS_001    10362 AAGATATATTTTAAACAATATTCTTTCCCTTATTCTGCAAAAGTATAGGA    10411
EMBOSS_001    10260 TTAACATTACATATTACAGATATTTTCTAAACTACAACCTTTTGGG    10309
      |||.|||.|.|||.|.|||.|.|||||.|||.|.|||||
EMBOSS_001    10412 TT-----ATATATTACAGATATTTT-CTAAACTACAATTCTTATGGG    10454
EMBOSS_001    10310 GAAATGGGCATATGTCTCAGAGATAAAACACTATAAAAAATGATGAAATAT    10359
      |||||.|.|||.|||.|.|||.|.|||||.|||.|.|||||
EMBOSS_001    10455 GAAATGGGCATATGTCTCAGAGATAAAACACAACAAAATGATGAAATAT    10504
EMBOSS_001    10360 TGATTTTATTTTAAAGACATACATTTAGGCCTCTTTTAAATTAGTATTGT    10409
      |||||.|.|||.|||.|.|||.|.|||||.|||.|.|||||
EMBOSS_001    10505 TGATTTTATTTTAAAGACATACATTTAGGCATCTTTTAAATTAGTATTGT    10554
EMBOSS_001    10410 TGACCAATGGACTTAGCCTATGTGTAAACCCATATCTTTATCATGAAA    10459
      |||||.|.|||.|||.|.|||.|.|||||.|||.|.|||||
EMBOSS_001    10555 TGACCATTGAACATAGCCTGTGTGTAAACCCATATCCTTATCATGAAA    10604
EMBOSS_001    10460 ATCAATAATATGGACAACACTACTATGTTCCACAGATGTTGAATGCAAAA    10509
      |||||.|.|||.|||.|.|||.|.|||||.|||.|.|||||
EMBOSS_001    10605 ATCAATGATATGGACAACACTACATGGTTCCCATGTATTTGAATGCAAAAT    10654
EMBOSS_001    10510 GACAAAGTTAGGGAGTTTACAGAAGAGCTTGTATCAGGATAACTTGACA    10559
      |||||.|.|||.|||.|.|||.|.|||||.|||.|.|||||
EMBOSS_001    10655 GACGAAGTTTGAGCATTTACAGAAGAGTTGGTTATCGGGATAACTTGGA    10704
EMBOSS_001    10560 ATTTATTAGTGATGCAATGTCAGAGGCCACCATCACTGCATTCTCTATGG    10609
      |||||.|.|||.|||.|.|||.|.|||||.|||.|.|||||
EMBOSS_001    10705 ATTTATTAGTGATATAATGTCGGAGGCCACAATCACTCCCTTCTCTATGG    10754
EMBOSS_001    10610 TGTGCTGGTTCACCAGATGGAAGTTATTTGGGCGTACTAGTAAGTCTTT    10659
      |||||.|.|||.|||.|.|||.|.|||||.|||.|.|||||
EMBOSS_001    10755 TGTGCTGGCTCACCAGATGGAAGTTATTTGGGCATACTATTAAGTTGTT    10804
EMBOSS_001    10660 CCTGAAATATTACACCCTTGTCTTTCTAATTAATGAAAAATTAAAGTT    10709
      |||||.|.|||.|||.|.|||.|.|||||.|||.|.|||||
EMBOSS_001    10805 CCTGAGATATTACACCCTGTTCTTTCTAATCAAGTGAAAAATTAACTT    10854
EMBOSS_001    10710 GCTGATTTGCAACAAGGATGCTAAACTACATACAGACATGATGTATGAA    10759
      |||||.|.|||.|||.|.|||.|.|||||.|||.|.|||||
EMBOSS_001    10855 GCTGATTT-GCAACAAGGATGCTAAACTACATGCAGACATAATGTGTGAA    10903
EMBOSS_001    10760 TTCCATATAGTTAAATCAGGCCTCGAAATTTCTGAAGTAACAATTTAAT    10809
      |||||.|.|||.|||.|.|||.|.|||||.|||.|.|||||
EMBOSS_001    10904 TTCCATCTACTTAAATTAGACCTCAAATTTCTGAAGTAACAATTTAAT    10953
EMBOSS_001    10810 AAAGACTGTCCAGGGTCTAGGCATGGAGGAGTTTGTGCTTCACTTGATAG    10859
      |||||.|.|||.|||.|.|||.|.|||||.|||.|.|||||
EMBOSS_001    10954 AAAGACTGTCCAAGGTCTGGGATAGAGGAGTTTGTGCTTCACTTGATAG    11003
EMBOSS_001    10860 AAACATCTAATAAAACATGGTTCAATCAACTATGTTCAATACGTCTTTC    10909
      |||||.|.|||.|||.|.|||.|.|||||.|||.|.|||||
EMBOSS_001    11004 AAACATCTAATAAAACATGATTCATCAACTATGTTCAATACATCTTTT    11053
EMBOSS_001    10910 AAATACAGCAAATGAGATGAGATCATACTCTACTCTACAGAAAATATGC    10959
    
```

```
#####
# Program: stretcher
# Rundate: Wed 18 Mar 2015 08:30:16
# Commandline: stretcher
#   -auto
#   -stdout
#   -asequence emboss_stretcher-I20150318-083015-0612-47599624-oy.asequence
#   -bsequence emboss_stretcher-I20150318-083015-0612-47599624-oy.bsequence
#   -datafile EDNAFULL
#   -gapopen 16
#   -gapextend 4
#   -aformat3 pair
#   -snucleotide1
#   -snucleotide2
# Align_format: pair
# Report_file: stdout
#####
```

```
#=====
#
# Aligned_sequences: 2
# 1: EMBOSS_001
# 2: EMBOSS_001
# Matrix: EDNAFULL
# Gap_penalty: 16
# Extend_penalty: 4
#
# Length: 101
# Identity:      86/101 (85.1%)
# Similarity:   86/101 (85.1%)
# Gaps:         0/101 ( 0.0%)
# Score: 370
#
#
#=====
```

```
EMBOSS_001      1 CCAATGGACTTAGCCTATGTGTTAACCCATATTCCTTATCATGAAAATCA      50
                  |||.|||.|||.|||||.|||||.|||||.|||||.|||||.|||||.|||||.
EMBOSS_001      1 CCATTGAACATAGCCTGTGTGTTAACCCATATTCCTTATCATGAAAATCA      50

EMBOSS_001     51 ATAATATGGACAACACTACTATGTTCCACAGATGTTGAATGCAAAAAGACA     100
                  |||.|||||.|||||.|||||.|||||.|||||.|||||.|||||.|||||.
EMBOSS_001     51 ATGATATGGACAACACTACATGGTTCCCATGTATTTGAATGCAAAAATGACG     100

EMBOSS_001     101 A      101
                   |
EMBOSS_001     101 A      101
```

```
#-----
#-----
```

```

      ||||..||||..|||.  |||
EMBOSS_001 10076 GACTCAACATTTTTTCAGGACAACATGGAAAATATTTCTTAAAATATTACA 10125

EMBOSS_001 10317 -----GCAT-----ATGTCT---- 10326
      ||||                               |||||
EMBOSS_001 10126 CTTACAGAAGTGCATTTTCTAACTAAAATAAAAAATTAGAAATGTCTAATG 10175

EMBOSS_001 10327 -----CAGAG-----ATAAAACA----- 10339
      |||.                               |||||.
EMBOSS_001 10176 GATCCTCAGATGTGTTTGTATATAAAAATAAGAGTCTATTTAATTATATT 10225

EMBOSS_001 10340 ---CTATAAAA-----ATGATGAAA----- 10356
      ||.||||                               ||..||||
EMBOSS_001 10226 AAGCTTTAAAAGTTTTTAATATACTGTAAATTCATTTTGAAAACTTTATG 10275

EMBOSS_001 10357 -----TATTGATTT-TATTTTTA-----AGACA----- 10378
      ||||.|||. |||.|||.                               ||||
EMBOSS_001 10276 TATATACATATATTCATATATATATATATATATGCATATAGAGACAGTTTATG 10325

EMBOSS_001 10379 -----TACATTT---AGGCCTC----- 10392
      |||||.  ||.||||
EMBOSS_001 10326 TCATATTTACATCTTCCAAGTCTCCAGAACCCCAATGAACCTTCCCA 10375

EMBOSS_001 10393 -----TTTTT-----AATTAGTATT----- 10407
      |||||                               |||||.
EMBOSS_001 10376 ACTTCATATCTTATTTTTTAAAGATTATTGTCCAATTAGTGTTTTCTATA 10425

EMBOSS_001 10408 -----GTTG-----ACCCAATGGA-----CTTAGCCTATGTG 10434
      ||||                               |.||||.||||                               |||||.|||.
EMBOSS_001 10426 TATACATGGTGTGGGGTCCACTGGAGAGTCAACTTACCAGAGACC 10475

EMBOSS_001 10435 TTAACCA-----TATCTTTATCATGAAA-TC 10462
      .||.||||                               ||.||||.|||||.|||.
EMBOSS_001 10476 ATACCCAAAAGAAAAGTACTCTCTCTTTACTATTCATCACTGTC 10525

EMBOSS_001 10463 AATA-----ATATGGA--CAA---CTACTATGTTCC--- 10488
      |.                               ||.|||| |. |||.|||||.|||.
EMBOSS_001 10526 AATTGCTCCTCATTGAGATTTGGATCCCATATGCTTCTATTTTTATTTC 10575

EMBOSS_001 10489 ---CACAGATGTTGAATGCAAAAAGACAA-----AGTTAGG 10521
      |..|.|||||.|||.|||.|||.|||.|||. |||||.
EMBOSS_001 10576 ATGCTGAAATGTTGACTCTCAAAGTGAACCACAGCTGCTGTGAGTTTCAG 10625

EMBOSS_001 10522 GAGT-----TTA-----CAGAAGAG 10536
      .|||                               |||                               |||.
EMBOSS_001 10626 CAGTACAATGATCCTGTGCGATTAGAACTCTCCTCTCCTGTTTCATATAAA 10675

EMBOSS_001 10537 CTTGTTATC-----AGGATAACTTGACA----- 10559
      |||.||||                               |||.|||.|||.
EMBOSS_001 10676 CTTTCTATCTCTCTTCCACTAGGTTCTTACTAGGGGGTTAGGGTATAA 10725

EMBOSS_001 10560 -----ATTTATTAGTGA---TGCA----- 10575
      ||||.|||.|||. |||.
EMBOSS_001 10726 TATATATGTCTCATTTGTTTCTGAGCACTCCATATATATATATATATA 10775

EMBOSS_001 10576 -ATGT-----CAGA-GGCCACCA-----TCA 10594
      ||||                               |||.|||.|||. |||
EMBOSS_001 10776 TATGTGCTCTCTACACATGGACAGTAATGAGTAAGTGCTTTTATTACTCA 10825

EMBOSS_001 10595 CTGCATTCT---CTATGGTGTGCTG-----GTT-CACCA-- 10625
      |||.|||. |||.|||.|||. ||| |||.
EMBOSS_001 10826 CTGTCTCTACACAAATGTTTTCTGATAAGGACTGATAGTTGCACAAAT 10875

EMBOSS_001 10626 -----GATGGAAG-----TTATT 10638
      |||||                               |||||

```

```
#####
# Program: stretcher
# Rundate: Fri 13 Mar 2015 08:11:32
# Commandline: stretcher
# -auto
# -stdout
# -asequence emboss_stretcher-I20150313-081131-0802-13800900-oy.asequence
# -bsequence emboss_stretcher-I20150313-081131-0802-13800900-oy.bsequence
# -datafile EDNAFULL
# -gapopen 16
# -gapextend 4
# -aformat3 pair
# -snucleotide1
# -snucleotide2
# Align_format: pair
# Report_file: stdout
#####
```

```
#=====
#
# Aligned_sequences: 2
# 1: EMBOSS_001
# 2: EMBOSS_001
# Matrix: EDNAFULL
# Gap_penalty: 16
# Extend_penalty: 4
#
# Length: 107
# Identity:      47/107 (43.9%)
# Similarity:    47/107 (43.9%)
# Gaps:          12/107 (11.2%)
# Score: -65
#
#
#=====
```

```
EMBOSS_001      1  ----CCAATGGACTTAGCCTATGTGTTAACCCATATTCCTTTATCATGAA      45
                  |.|.|.|.|.|.|.|.|.|.|.|.|.|.|.|.|.|.|.|.|.|.|.|.|.|.|.|
EMBOSS_001      1  TACCCCAAAGAAACTGACTCTCTCTTTAC---TATTCATCATCA--AC      45

EMBOSS_001     46  AATCAATAATATGGACAACACTACTATGTTC--CACAGATGTTGAATGCAAA      94
                  ..|.|.|.|.|.|.|.|.|.|.|.|.|.|.|.|.|.|.|.|.|.|.|.|.|.|.|
EMBOSS_001     46  TGTC AATTGC-TCCTCATTTGAGATTTGGATCCCATATGCTTCTATTTTT      94

EMBOSS_001     95  AAGACAA      101
                  |...|.
EMBOSS_001     95  ATTCAT      101
```

```
#-----
#-----
```

rs628117





```
#####
# Program: stretcher
# Rundate: Mon 16 Mar 2015 08:19:51
# Commandline: stretcher
#   -auto
#   -stdout
#   -asequence emboss_stretcher-I20150316-081949-0642-17674448-es.asequence
#   -bsequence emboss_stretcher-I20150316-081949-0642-17674448-es.bsequence
#   -datafile EDNAFULL
#   -gapopen 16
#   -gapextend 4
#   -aformat3 pair
#   -snucleotide1
#   -snucleotide2
# Align_format: pair
# Report_file: stdout
#####
```

```
#=====
#
# Aligned_sequences: 2
# 1: EMBOSS_001
# 2: EMBOSS_001
# Matrix: EDNAFULL
# Gap_penalty: 16
# Extend_penalty: 4
#
# Length: 101
# Identity:      99/101 (98.0%)
# Similarity:   101/101 (100.0%)
# Gaps:         0/101 ( 0.0%)
# Score: 497
#
#
#=====
```

```
EMBOSS_001      1 AGACATAGTCCCTACCCATTCTCATAGGCCTAAGATGTTAACGGAAACAA      50
  |||:|||||
EMBOSS_001      1 AGACATAGTCCCYACCCATTCTCATAGGCCTAAGATGTTAACGGAAACAA      50

EMBOSS_001     51 CGGGCTTTCATTCCAAGGATGCAAATGATGCAATTC AAGCCAAATATCCT     100
  :|||
EMBOSS_001     51 YGGGCTTTCATTCCAAGGATGCAAATGATGCAATTC AAGCCAAATATCCT     100

EMBOSS_001     101 G      101
      |
EMBOSS_001     101 G      101
```

```
#-----
#-----
```



```
#####
# Program: stretcher
# Rundate: Mon 16 Mar 2015 08:20:37
# Commandline: stretcher
#   -auto
#   -stdout
#   -asequence emboss_stretcher-I20150316-082036-0610-10234809-es.asequence
#   -bsequence emboss_stretcher-I20150316-082036-0610-10234809-es.bsequence
#   -datafile EDNAFULL
#   -gapopen 16
#   -gapextend 4
#   -aformat3 pair
#   -snucleotide1
#   -snucleotide2
# Align_format: pair
# Report_file: stdout
#####
```

```
#=====
#
# Aligned_sequences: 2
# 1: EMBOSS_001
# 2: EMBOSS_001
# Matrix: EDNAFULL
# Gap_penalty: 16
# Extend_penalty: 4
#
# Length: 101
# Identity:      71/101 (70.3%)
# Similarity:   71/101 (70.3%)
# Gaps:         0/101 ( 0.0%)
# Score: 293
#
#
#=====
```

```
EMBOSS_001      1 AGACATAGTCCCTACCCATTCTCATAGGCCTAAGATGTTAACGGAAACAA      50
                |||.....|
EMBOSS_001      1 AGACATAGTCCCCACCCATTCTCATNNNNNNNNNNNNNNNNNNNNNNNNNNNN      50

EMBOSS_001     51 CGGGCTTTCATTCCAAGGATGCAAATGATGCAATTC AAGCCAAATATCCT      100
                ....|
EMBOSS_001     51 NNNNCTTTCATTCCAAGGATGCAAATGATGCAATTC AAGCCAAATATCCT      100

EMBOSS_001     101 G      101
                |
EMBOSS_001     101 G      101
```

```
#-----
#-----
```









```
#####
# Program: stretcher
# Rundate: Tue 21 Oct 2014 08:07:35
# Commandline: stretcher
# -auto
# -stdout
# -asequence emboss_stretcher-I20141021-080735-0030-39139332-es.asequence
# -bsequence emboss_stretcher-I20141021-080735-0030-39139332-es.bsequence
# -datafile EDNAFULL
# -gapopen 16
# -gapextend 4
# -aformat3 pair
# -snucleotide1
# -snucleotide2
# Align_format: pair
# Report_file: stdout
#####
```

```
#=====
#
# Aligned_sequences: 2
# 1: EMBOSS_001
# 2: EMBOSS_001
# Matrix: EDNAFULL
# Gap_penalty: 16
# Extend_penalty: 4
#
# Length: 101
# Identity: 101/101 (100.0%)
# Similarity: 101/101 (100.0%)
# Gaps: 0/101 ( 0.0%)
# Score: 505
#
#
#=====
```

```
EMBOSS_001      1 AGACATAGTCCCTACCCATTCTCATAGGCCTAAGATGTTAACGGAAACAA      50
                |||
EMBOSS_001      1 AGACATAGTCCCTACCCATTCTCATAGGCCTAAGATGTTAACGGAAACAA      50

EMBOSS_001     51 CGGGCTTTCATTCCAAGGATGCAAATGATGCAATTCAAGCCAAATATCCT     100
                |||
EMBOSS_001     51 CGGGCTTTCATTCCAAGGATGCAAATGATGCAATTCAAGCCAAATATCCT     100

EMBOSS_001     101 G      101
                |
EMBOSS_001     101 G      101
```

```
#-----
#-----
```

```
#####
# Program: stretcher
# Rundate: Tue 28 Oct 2014 09:48:57
# Commandline: stretcher
# -auto
# -stdout
# -asequence emboss_stretcher-I20141028-094856-0037-85165641-es.asequence
# -bsequence emboss_stretcher-I20141028-094856-0037-85165641-es.bsequence
# -datafile EDNAFULL
# -gapopen 16
# -gapextend 4
# -aformat3 pair
# -snucleotide1
# -snucleotide2
# Align_format: pair
# Report_file: stdout
#####
```

```
#=====
#
# Aligned_sequences: 2
# 1: EMBOSS_001
# 2: EMBOSS_001
# Matrix: EDNAFULL
# Gap_penalty: 16
# Extend_penalty: 4
#
# Length: 101
# Identity: 100/101 (99.0%)
# Similarity: 100/101 (99.0%)
# Gaps: 0/101 ( 0.0%)
# Score: 496
#
#
#=====
```

```
EMBOSS_001      1 AGACATAGTCCCTACCCATTCTCATAGGCCTAAGATGTTAACGGAAACAA      50
  |||
EMBOSS_001      1 AGACATAGTCCCTACCCATTCTCATAGGCCTAAGATGTTAACGGAAACAA      50

EMBOSS_001     51 CGGGCTTTCATTCCAAGGATGCAAATGATGCAATTCAAGCCAAATATCCT     100
  .|||
EMBOSS_001     51 TGGGCTTTCATTCCAAGGATGCAAATGATGCAATTCAAGCCAAATATCCT     100

EMBOSS_001      101 G      101
      |
EMBOSS_001      101 G      101
```

```
#-----
#-----
```

```
#####
# Program: stretcher
# Rundate: Tue 21 Oct 2014 08:05:27
# Commandline: stretcher
#   -auto
#   -stdout
#   -asequence emboss_stretcher-I20141021-080526-0552-48136437-pg.asequence
#   -bsequence emboss_stretcher-I20141021-080526-0552-48136437-pg.bsequence
#   -datafile EDNAFULL
#   -gapopen 16
#   -gapextend 4
#   -aformat3 pair
#   -snucleotide1
#   -snucleotide2
# Align_format: pair
# Report_file: stdout
#####
```

```
#=====
#
# Aligned_sequences: 2
# 1: EMBOSS_001
# 2: EMBOSS_001
# Matrix: EDNAFULL
# Gap_penalty: 16
# Extend_penalty: 4
#
# Length: 101
# Identity:      100/101 (99.0%)
# Similarity:    100/101 (99.0%)
# Gaps:          0/101 ( 0.0%)
# Score: 496
#
#
#=====
```

```
EMBOSS_001      1 AGACATAGTCCCTACCCATTCTCATAGGCCTAAGATGTTAACGGAAACAA      50
  |||
EMBOSS_001      1 AGACATAGTCCCTACCCATTCTCATAGGCCTAAGATGTTAACGGAAACAA      50

EMBOSS_001     51 CGGGCTTTCATTCCAAGGATGCAAATGATGCAATTCAAGCCAAATATCCT     100
  .|||
EMBOSS_001     51 TGGGCTTTCATTCCAAGGATGCAAATGATGCAATTCAAGCCAAATATCCT     100

EMBOSS_001      101 G      101
      |
EMBOSS_001      101 G      101
```

```
#-----
#-----
```



```
#####
# Program: stretcher
# Rundate: Sat 15 Nov 2014 04:54:22
# Commandline: stretcher
# -auto
# -stdout
# -asequence emboss_stretcher-I20141115-045421-0480-55903460-oy.asequence
# -bsequence emboss_stretcher-I20141115-045421-0480-55903460-oy.bsequence
# -datafile EDNAFULL
# -gapopen 16
# -gapextend 4
# -aformat3 pair
# -snucleotide1
# -snucleotide2
# Align_format: pair
# Report_file: stdout
#####
```

```
#=====
#
# Aligned_sequences: 2
# 1: EMBOSS_001
# 2: EMBOSS_001
# Matrix: EDNAFULL
# Gap_penalty: 16
# Extend_penalty: 4
#
# Length: 101
# Identity:      85/101 (84.2%)
# Similarity:   85/101 (84.2%)
# Gaps:         0/101 ( 0.0%)
# Score: 393
#
#
#=====
```

```
EMBOSS_001      1 AGACATAGTCCCTACCCATTCTCATAGGCCTAAGATGTTAACGGAAACAA      50
                  ...|
EMBOSS_001      1 NNNCATAGTCCCTACCCATTCTCATAGGCCTAAGATGTTAACGGAAACAA      50

EMBOSS_001     51 CGGGCTTTCATTCCAAGGATGCAAATGATGCAATTCAAGCCAAATATCCT     100
                  |||
EMBOSS_001     51 CGGGCTTTCATTCCAAGGATGCAAATGATGCAATTCAANNNNNNNNNNNN     100

EMBOSS_001     101 G      101
                  .
EMBOSS_001     101 N      101
```

```
#-----
#-----
```



```

7      17487 AAATTATTTTCAGTAATAAACATGCGTTGTGCCATCAGTATGCTTGGACAT 17536
      16998 TTCACACATGTTACTTTTATTTATTCTTCCAATAACCCCTGCAAAGGAGTGC 17047
7      17537 TTCGTACACGTTATTTTATTTATTCTACCAATAACC-TGCAAAGAAGTGC 17585
      17048 TAATATACTCATTTTAGAGATGAGGAACTGAGTCTCAGAGAACTTAATA 17097
7      17586 TAGTATATTCATTTTATAGAGGAGGAACTGAGTCTCAGAGAGTTTAATA 17635
      17098 TGCTCAAAGCAAACAACCTAGTAGCTGATAGAGCTATTATAAAAATCAAAAT 17147
7      17636 TGCTCAAAGCAAACAACCTAGTAGCTGATAGAGCTATTATAAAAATCAGAAT 17685
      17148 ACAGATTTGACTCCTTGCCCCACATGCCACACCAACTCACTGTGATAGGT 17197
7      17686 ACAGACTTGACTTCTTGACCACATGCCACACCAACTCACTGTGATAGGT 17735
      17198 CCAAAAATAAACCCACCTCAAGCCCAACCCCTCCTTTAGAACAGGAGGGTA 17247
7      17736 CCCAAAATAAACCCACCTTAAGCTAAACCGTCTTGAGAACCAGGAGGGTA 17785
      17248 ATAGGAACTTGCAGTGTTCTAATATTGGACCACAGCCAGCTACAGGATC 17297
7      17786 ATATGAACTCACACTGTTCTATTCTTGACCACAGCCTAGCTGTAGGATC 17835
      17298 AGTTTGCTTTTCAGTGAAATGAAAACAGCCCTCAGTACTCATTAATGGGAG 17347
7      17836 AGTTTCTTTTAAATGAAATGAAAACAGCCCTCAGTATTCATTAATGGGAG 17885
      17348 TGTTGGTAAACACAAACAATACCACACAACAGAGAAAGAGACTTTAGGAT 17397
7      17886 GTTGGTAAACACAAACAATACCACACAACAGAGAAAGAGACTTCTTGAT 17935
      17398 AAAAGCAAGCAGTGACTGACAAGGCTTACCAATTCTCTCTCACTATCTGT 17447
7      17936 AAAAGCAAGCAGTGACTGACAAAGCTTACAGATCCTCTCTCACTATGTCT 17985
      17448 TTATCATTT---ATCAGGAACAAATGTTTGTTCCTGCCCCTCTGTGTGCA 17494
7      17986 TTATCATCTCCTAACAGGAACAAATGTTTGTTCCTGCCCCTCTGTGTGCA 18035
      17495 GTGAATTTATTTCTCAGAATCAACAACCTATTGCACCCATGCATACTTTGC 17544
7      18036 GTGAATTTATTTCTCAGAATCAACAACCTATTGCACCCATGGATACTTTGC 18085
      17545 ACAAGCAAGTTATACTCAGATTACCAGCTCACAAGGACAGTGTTTACTTG 17594
7      18086 TCTAGCAAGTTATACTCCGATTCCAGCTCTCAAGGCCAGTGTGACATG 18135
      17595 CATGCAGAGGAGAGACCCTGCCGTAAGTA--GACACTGCTGAGACATAG 17642
7      18136 CATGCAGAGGAGAGACCCTACAGTAAAGCACAGACACTGCTGAGACATAG 18185
      17643 TCCCTACCCATTCTCATAGGCCTAAGATGTTAACGGAACAACCGGGCTTT 17692
7      18186 -CCCTACACCTTACATGGGCCTAAGAT-----CAGGCTAT 18220
      17693 CATTCCAAGGATGCAAATGATGCAATTCAAGCCAAATATCCTGTGTCTTT 17742
7      18221 CATTCCAAGGATGCAAATGATGCGATTCAAGCCAAAAATCCTGTGTCTTT 18270
      17743 TTACCAA-AAAAAAAAAATCACTCTGACCAATTCCTCAAACCTGTCAAAA 17791
      |.||||| ||||| |.||||| |.||||| |.||||| |.||||| |.|||||

```



```

17526 GCACCCATGCATACTTTGCACAAGCAAGTTATACTCAGATTACCAGCTCA 17575
      |||||.|.|...|||.|.|||.|.|||.|.|||.|.|||.|.|||.|.
18724 GCACCCCTTGTCCACTTGGAACACACACCTTATGCTCAGATGGCCAGCTCT 18773

17576 CAAGGACAGTGTTTACTTGCATGCAGAGGAGAGACCCTGCCGTAAAGTAG 17625
      |||.|.|.|.|.|.|.|.|.|.|.|||.|.|||.|.|||.|.|||.|.|.
18774 CAAAGGC-----TCAGGTGTGTGCAGAGAAGAGATCTTGTGATGCTGCAT 18818

17626 AACTGCTGAGACATAGTCCCTACCCATT-CTCATAGGCCTAAGATGTTA 17674
      .|.|.|.|.|||.|||.|||.|.|||.|||.|||.|||.|||.|||.|||.
18819 GCCC--CTAAGAAGCAGGC--TATGAGTTGCGTACAGGCCTA-GCTGTCC 18863

17675 ACGGAAACAACGGGCTTTCATTCCAAGGATGCAAATGATGCAATTCA-AG 17723
      |||||.|.|.|.|.|.|.|.|.|||.|||.|||.|||.|||.|||.
18864 ----AAACCATGAGGCGTCATTCTGAGGAT----ATG--TCAGGTCACAG 18903

17724 CCAAATATCCTGTGTCTTTTTACCAAAAAAAAAAAATCACT-----C 17765
      |||.|||.|||.|||.|||.|||.|||.|||.|||.|||.|||.|||.
18904 C--AAGATCC---GCACATCTACCACATGAAAACATCACTGAGATTTTC 18948

17766 TGACCAATTCTCAAACCTGTCAAAAATTTAGATAAAATAAACATCAAAC 17815
      |||||.|.|.|||.|.|.|||.|||.|||.|||.|||.|||.|||.
18949 TGACCAGTTACTCACATCTGTCAAAAATTCAAATAAATTAACGCCGAACA 18998

17816 GTGGCCCAATAAGCAGACCCCATGTCA--CTTACTAATTAATA-CCCAA 17862
      |||.|||.|||.|||.|||.|||.|||.|||.|||.|||.|||.|||.
18999 GTAGCCCATTTGGCAGACTCTACAATAACCTTCATAAACCAACATCCCAA 19048

17863 AGGAGGA-AATAGCATGCAT--AAATAGCTATCATCTATTTAGTCACTGG 17909
      |||.|||.|||.|||.|||.|||.|||.|||.|||.|||.|||.|||.
19049 AGGAAAAGAAAAGAGTGCATGTAAGTAGTTA-CATATAGTTAATCACAGA 19097

17910 ATCATATAT--GAAAAGAGGTAACCTTATTC AACATCATCATCATGGC 17957
      .|||.|||.|||.|||.|||.|||.|||.|||.|||.|||.|||.|||.
19098 CTCAGATGTAGGGAACAAAGACACCCCTTAT-CCACTGGCATTGTTATGGC 19146

17958 AGGCTCTTCGCATC-ATTTTATCTGATCTTTGCAATATCCCTATAATAGA 18006
      |||.|||.|||.|||.|||.|||.|||.|||.|||.|||.|||.|||.
19147 AGACTTTTTTCTGCCATCTTACTTAATTTTCACTATGTCCCTATAATAG- 19195

18007 AGATACCATTTTTTTGCTTCTTACAGATAAGGAAACCAAGCTTACAGAGGT 18056
      |||||.|||.|||.|||.|||.|||.|||.|||.|||.|||.|||.
19196 -GATATTGTGTTTTCAGCATTTTAAGGCTAAAGAAAAAAAA-----AAAAA--- 19237

18057 GAAGCACATTTGAGGTCAGGAATTTAGAAGAGAAATGAATGAGGCTCAAA 18106
      |||.|.|.|.|||.|||.|||.|||.|||.|||.|||.|||.|||.
19238 -AACCC-----TAAGGCCTGGAT-----AGGGACAAA 19263

18107 CCCAGCTCTCTTCTCCTCTCCACCCACACCAACATACATTTCATCGTTCAGG 18156
      |||.|||.
19264 -----AACTT----- 19268

18157 TGCTACGTGTGAGCACAGTGTGTGCCAACTCTGTGGTAAGCCTTGTAGG 18206
      |||.|||.|||.|||.|||.
19269 -----GTGCAAAGTC-----AAG-----AGA 19284

18207 GAAGCAGAGGCAAGAATGAGGAAGACTCTTGAACATTAGTCACTCACATG 18256
      .|.|||.|||.|||.|||.|||.|||.|||.|||.|||.|||.|||.
19285 CATCCAGAGCAAAGAGTAAGTA-----TTTGGAAATCGGTT-CTCTCCT- 19327

18257 GTGACTATTTTTTTTTTTTTTTTTTCTGAGACTGAGATTTGCTTTTGTGCGCC 18306
      .|.|||.|||.|||.|||.|||.|||.|||.|||.|||.|||.|||.
19328 -----TTTTCTTTTTTTTTTTTTTCTTTTTTTTTTTTTTTTTTTTTTGTCA 19372

18307 CAGGCTGGAGTGCAATGGGGCGATCTCAGCTCATTACAACCTCCACCTCC 18356
    
```



rs96501

```
#####
# Program: stretcher
# Rundate: Wed 14 Jan 2015 06:25:40
# Commandline: stretcher
#   -auto
#   -stdout
#   -asequence emboss_stretcher-I20150114-062539-0041-9519764-oy.asequence
#   -bsequence emboss_stretcher-I20150114-062539-0041-9519764-oy.bsequence
#   -datafile EDNAFULL
#   -gapopen 16
#   -gapextend 4
#   -aformat3 pair
#   -snucleotide1
#   -snucleotide2
# Align_format: pair
# Report_file: stdout
#####
```

```
#=====
#
# Aligned_sequences: 2
# 1: EMBOSS_001
# 2: EMBOSS_001
# Matrix: EDNAFULL
# Gap_penalty: 16
# Extend_penalty: 4
#
# Length: 101
# Identity:      101/101 (100.0%)
# Similarity:   101/101 (100.0%)
# Gaps:         0/101 ( 0.0%)
# Score: 505
#
#
#=====
```

```
EMBOSS_001      1 TACCTTCATAGGATCACTGCATTTTTCTGACATTGTTTCTTCTCAGCAT      50
  |||
EMBOSS_001      1 TACCTTCATAGGATCACTGCATTTTTCTGACATTGTTTCTTCTCAGCAT      50

EMBOSS_001     51 CCTTTATGGTCTTTCTCTTCCAATGGCCTAAATGCTGATGTTCTTCAGTT     100
  |||
EMBOSS_001     51 CCTTTATGGTCTTTCTCTTCCAATGGCCTAAATGCTGATGTTCTTCAGTT     100

EMBOSS_001      101 T      101
      |
EMBOSS_001      101 T      101
```

```
#-----
#-----
```





```
#####
# Program: stretcher
# Rundate: Tue 17 Mar 2015 07:54:46
# Commandline: stretcher
#   -auto
#   -stdout
#   -asequence emboss_stretcher-I20150317-075444-0437-69932425-es.asequence
#   -bsequence emboss_stretcher-I20150317-075444-0437-69932425-es.bsequence
#   -datafile EDNAFULL
#   -gapopen 16
#   -gapextend 4
#   -aformat3 pair
#   -snucleotide1
#   -snucleotide2
# Align_format: pair
# Report_file: stdout
#####
```

```
#=====
#
# Aligned_sequences: 2
# 1: EMBOSS_001
# 2: EMBOSS_001
# Matrix: EDNAFULL
# Gap_penalty: 16
# Extend_penalty: 4
#
# Length: 101
# Identity:      84/101 (83.2%)
# Similarity:   84/101 (83.2%)
# Gaps:         0/101 ( 0.0%)
# Score: 384
#
#
#=====
```

```
EMBOSS_001      1 TACCTTCATAGGATCACTGCATTTTTCTGACATTGTTTCTTCTCAGCAT      50
  |||
EMBOSS_001      1 TACCTTCATAGGATCACTGCATTTTTCTGACATTGTTTCTTCTCAGCAT      50

EMBOSS_001     51 CCTTTATGGTCTTTCTCTTCCAATGGCCTAAATGCTGATGTTCTTCAGTT     100
  .|||
EMBOSS_001     51 TCTTTATGGTCTTTCTCTTCCAATGGCCTAAATGNNNNNNNNNNNNNNNNN     100

EMBOSS_001     101 T      101
      |
EMBOSS_001     101 T      101
```

```
#-----
#-----
```

```
#####
# Program: stretcher
# Rundate: Tue 17 Mar 2015 07:56:11
# Commandline: stretcher
#   -auto
#   -stdout
#   -asequence emboss_stretcher-I20150317-075610-0454-35318161-pg.asequence
#   -bsequence emboss_stretcher-I20150317-075610-0454-35318161-pg.bsequence
#   -datafile EDNAFULL
#   -gapopen 16
#   -gapextend 4
#   -aformat3 pair
#   -snucleotide1
#   -snucleotide2
# Align_format: pair
# Report_file: stdout
#####
```

```
#=====
#
# Aligned_sequences: 2
# 1: EMBOSS_001
# 2: EMBOSS_001
# Matrix: EDNAFULL
# Gap_penalty: 16
# Extend_penalty: 4
#
# Length: 101
# Identity:      57/101 (56.4%)
# Similarity:    57/101 (56.4%)
# Gaps:          0/101 ( 0.0%)
# Score: 197
#
#
#=====
```

```
EMBOSS_001      1 TACCTTCATAGGATCACTGCATTTTTCTGACATTGTTTCTTCTCAGCAT      50
  |||.....
EMBOSS_001      1 TACCTTCATAGGATCACTGCATTTTTCTGACANNNNNNNNNNNNNNNNN      50

EMBOSS_001     51 CCTTTATGGTCTTTCTCTTCCAATGGCCTAAATGCTGATGTTCTTCAGTT     100
  .|||.....
EMBOSS_001     51 NCTTTATGGTCTTTCTCTTCCAATGGNNNNNNNNNNNNNNNNNNNNNNNN      100

EMBOSS_001     101 T      101
      .
EMBOSS_001     101 N      101
```

```
#-----
#-----
```

```
#####
# Program: stretcher
# Rundate: Sat 3 Jan 2015 09:21:56
# Commandline: stretcher
# -auto
# -stdout
# -asequence emboss_stretcher-I20150103-092155-0609-66954141-es.asequence
# -bsequence emboss_stretcher-I20150103-092155-0609-66954141-es.bsequence
# -datafile EDNAFULL
# -gapopen 16
# -gapextend 4
# -aformat3 pair
# -snucleotide1
# -snucleotide2
# Align_format: pair
# Report_file: stdout
#####
```

```
#=====
#
# Aligned_sequences: 2
# 1: EMBOSS_001
# 2: EMBOSS_001
# Matrix: EDNAFULL
# Gap_penalty: 16
# Extend_penalty: 4
#
# Length: 101
# Identity: 100/101 (99.0%)
# Similarity: 100/101 (99.0%)
# Gaps: 0/101 ( 0.0%)
# Score: 496
#
#
#=====
```

```
EMBOSS_001      1 TACCTTCATAGGATCACTGCATTTTTCTGACATTGTTTCTTCTCAGCAT      50
  |||
EMBOSS_001      1 TACCTTCATAGGATCACTGCATTTTTCTGACATTGTTTCTTCTCAGCAT      50

EMBOSS_001     51 CCTTTATGGTCTTTCTCTTCCAATGGCCTAAATGCTGATGTTCTTCAGTT     100
  .|||
EMBOSS_001     51 TCTTTATGGTCTTTCTCTTCCAATGGCCTAAATGCTGATGTTCTTCAGTT     100

EMBOSS_001     101 T      101
      |
EMBOSS_001     101 T      101
```

```
#-----
#-----
```

```
#####
# Program: stretcher
# Rundate: Fri 26 Dec 2014 08:01:57
# Commandline: stretcher
#   -auto
#   -stdout
#   -asequence emboss_stretcher-I20141226-080155-0954-77383607-pg.asequence
#   -bsequence emboss_stretcher-I20141226-080155-0954-77383607-pg.bsequence
#   -datafile EDNAFULL
#   -gapopen 16
#   -gapextend 4
#   -aformat3 pair
#   -snucleotide1
#   -snucleotide2
# Align_format: pair
# Report_file: stdout
#####
```

```
#=====
#
# Aligned_sequences: 2
# 1: EMBOSS_001
# 2: EMBOSS_001
# Matrix: EDNAFULL
# Gap_penalty: 16
# Extend_penalty: 4
#
# Length: 101
# Identity:      100/101 (99.0%)
# Similarity:   100/101 (99.0%)
# Gaps:         0/101 ( 0.0%)
# Score: 496
#
#
#=====
```

```
EMBOSS_001      1 TACCTTCATAGGATCACTGCATTTTTCTGACATTGTTTCTTCTCAGCAT      50
                  |||
EMBOSS_001      1 TACCTTCATAGGATCACTGCATTTTTCTGACATTGTTTCTTCTCAGCAT      50

EMBOSS_001     51 CCTTTATGGTCTTTCTCTTCCAATGGCCTAAATGCTGATGTTCTTCAGTT     100
                  .|||
EMBOSS_001     51 TCTTTATGGTCTTTCTCTTCCAATGGCCTAAATGCTGATGTTCTTCAGTT     100

EMBOSS_001     101 T      101
                   |
EMBOSS_001     101 T      101
```

```
#-----
#-----
```









```
#####
# Program: stretcher
# Rundate: Tue 28 Oct 2014 09:50:42
# Commandline: stretcher
#   -auto
#   -stdout
#   -asequence emboss_stretcher-I20141028-095041-0047-96009693-es.asequence
#   -bsequence emboss_stretcher-I20141028-095041-0047-96009693-es.bsequence
#   -datafile EDNAFULL
#   -gapopen 16
#   -gapextend 4
#   -aformat3 pair
#   -snucleotide1
#   -snucleotide2
# Align_format: pair
# Report_file: stdout
#####
```

```
#=====
#
# Aligned_sequences: 2
# 1: EMBOSS_001
# 2: EMBOSS_001
# Matrix: EDNAFULL
# Gap_penalty: 16
# Extend_penalty: 4
#
# Length: 101
# Identity:      101/101 (100.0%)
# Similarity:    101/101 (100.0%)
# Gaps:          0/101 ( 0.0%)
# Score: 505
#
#
#=====
```

```
EMBOSS_001      1 TACCTTCATAGGATCACTGCATTTTTCTGACATTGTTTTCTTCTCAGCAT      50
  |||
EMBOSS_001      1 TACCTTCATAGGATCACTGCATTTTTCTGACATTGTTTTCTTCTCAGCAT      50

EMBOSS_001     51 CCTTTATGGTCTTTCTCTTCCAATGGCCTAAATGCTGATGTTCTTCAGTT     100
  |||
EMBOSS_001     51 CCTTTATGGTCTTTCTCTTCCAATGGCCTAAATGCTGATGTTCTTCAGTT     100

EMBOSS_001      101 T      101
      |
EMBOSS_001      101 T      101
```

```
#-----
#-----
```



```
#####
# Program: stretcher
# Rundate: Sat 15 Nov 2014 04:57:22
# Commandline: stretcher
#   -auto
#   -stdout
#   -asequence emboss_stretcher-I20141115-045721-0284-86194665-es.asequence
#   -bsequence emboss_stretcher-I20141115-045721-0284-86194665-es.bsequence
#   -datafile EDNAFULL
#   -gapopen 16
#   -gapextend 4
#   -aformat3 pair
#   -snucleotide1
#   -snucleotide2
# Align_format: pair
# Report_file: stdout
#####
```

```
#=====
#
# Aligned_sequences: 2
# 1: EMBOSS_001
# 2: EMBOSS_001
# Matrix: EDNAFULL
# Gap_penalty: 16
# Extend_penalty: 4
#
# Length: 101
# Identity:      28/101 (27.7%)
# Similarity:   28/101 (27.7%)
# Gaps:         0/101 ( 0.0%)
# Score: -6
#
#
#=====
```

```
EMBOSS_001      1 TACCTTCATAGGATCACTGCATTTTTCTGACATTGTTTTCTTCTCAGCAT      50
  |||.....
EMBOSS_001      1 TACCTTCATAGGATCACTGCATTTTTCTNNNNNNNNNNNNNNNNNNNNNN      50

EMBOSS_001     51 CCTTTATGGTCTTTCTCTTCCAATGGCCTAAATGCTGATGTTCTTCAGTT     100
  .....
EMBOSS_001     51 NNNNNNNNNNNNNNNNNNNNNNNNNNNNNNNNNNNNNNNNNNNNNNNNNNNNN      100

EMBOSS_001     101 T      101
      .
EMBOSS_001     101 N      101
```

```
#-----
#-----
```

```
#####
# Program: stretcher
# Rundate: Tue 13 Jan 2015 05:51:37
# Commandline: stretcher
#   -auto
#   -stdout
#   -asequence emboss_stretcher-I20150113-055137-0015-7542218-oy.asequence
#   -bsequence emboss_stretcher-I20150113-055137-0015-7542218-oy.bsequence
#   -datafile EDNAFULL
#   -gapopen 16
#   -gapextend 4
#   -aformat3 pair
#   -snucleotide1
#   -snucleotide2
# Align_format: pair
# Report_file: stdout
#####
```

```
#=====
#
# Aligned_sequences: 2
# 1: EMBOSS_001
# 2: EMBOSS_001
# Matrix: EDNAFULL
# Gap_penalty: 16
# Extend_penalty: 4
#
# Length: 101
# Identity:      98/101 (97.0%)
# Similarity:    98/101 (97.0%)
# Gaps:          0/101 ( 0.0%)
# Score: 478
#
#
#=====
```

```
EMBOSS_001      1 TACCTTCATAGGATCACTGCATTTTTCTGACATTGTTTTCTTCTCAGCAT      50
  |||
EMBOSS_001      1 TACCTTCATAGGATCACTGCATTTTTTTGACGTTGTTTTCTTCTCAGCAT      50
  |||

EMBOSS_001     51 CCTTTATGGTCTTTCTCTTCCAATGGCCTAAATGCTGATGTTCTTCAGTT     100
  .|||
EMBOSS_001     51 TCTTTATGGTCTTTCTCTTCCAATGGCCTAAATGCTGATGTTCTTCAGTT     100

EMBOSS_001     101 T      101
      |
EMBOSS_001     101 T      101
```

```
#-----
#-----
```







```
#####
# Program: stretcher
# Rundate: Wed 22 Oct 2014 06:54:21
# Commandline: stretcher
# -auto
# -stdout
# -asequence emboss_stretcher-I20141022-065420-0357-84219511-es.asequence
# -bsequence emboss_stretcher-I20141022-065420-0357-84219511-es.bsequence
# -datafile EDNAFULL
# -gapopen 16
# -gapextend 4
# -aformat3 pair
# -snucleotide1
# -snucleotide2
# Align_format: pair
# Report_file: stdout
#####
```

```
#=====
#
# Aligned_sequences: 2
# 1: EMBOSS_001
# 2: EMBOSS_001
# Matrix: EDNAFULL
# Gap_penalty: 16
# Extend_penalty: 4
#
# Length: 107
# Identity:      69/107 (64.5%)
# Similarity:   69/107 (64.5%)
# Gaps:         12/107 (11.2%)
# Score: 121
#
#
#=====
```

```
EMBOSS_001      1 TAC--CTTCATAGGATCACTGCATTTTTCTGACATTGTTTTCTTCTCAGC      48
                .|. |.||||..||.|||||||||||||.||||||| |.|||||....|
EMBOSS_001      1 CATGGCATCATGTGACCACTGCATTTTGTGACATT--TCTCTTCCAGCC      48

EMBOSS_001     49 ATCCTTTA---TGGT-CTTCTCTTCCAATGGCCTAAATGCTGATGTTCT      94
                |||.|||.| |||.|||||||||.||.|||||.|||. |||||.|||.||
EMBOSS_001     49 ATTCTTCACCCTGTTGCTTTCTCTGCATATGGCTGAG--GCTGGTACTCT      96

EMBOSS_001     95 TCAGTTT      101
                |||||.
EMBOSS_001     97 TCAGG--      101
```

```
#-----
#-----
```



rs4915045

```
#####
# Program: stretcher
# Rundate: Wed 14 Jan 2015 06:27:41
# Commandline: stretcher
#   -auto
#   -stdout
#   -asequence emboss_stretcher-I20150114-062740-0700-22351675-es.asequence
#   -bsequence emboss_stretcher-I20150114-062740-0700-22351675-es.bsequence
#   -datafile EDNAFULL
#   -gapopen 16
#   -gapextend 4
#   -aformat3 pair
#   -snucleotide1
#   -snucleotide2
# Align_format: pair
# Report_file: stdout
#####
```

```
#=====
#
# Aligned_sequences: 2
# 1: EMBOSS_001
# 2: EMBOSS_001
# Matrix: EDNAFULL
# Gap_penalty: 16
# Extend_penalty: 4
#
# Length: 101
# Identity:      101/101 (100.0%)
# Similarity:   101/101 (100.0%)
# Gaps:         0/101 ( 0.0%)
# Score: 505
#
#
#=====
```

```
EMBOSS_001      1 GGAAACACACACATACAGACACCCCCACTCAGACAGTGTACAAACTAAGA      50
  |||
EMBOSS_001      1 GGAAACACACACATACAGACACCCCCACTCAGACAGTGTACAAACTAAGA      50

EMBOSS_001     51 AGGCCTAACTGAACTAAGCCATATTTATCACCCGTGGACAGCACATCCGA     100
  |||
EMBOSS_001     51 AGGCCTAACTGAACTAAGCCATATTTATCACCCGTGGACAGCACATCCGA     100

EMBOSS_001     101 G      101
      |
EMBOSS_001     101 G      101
```

```
#-----
#-----
```

```
#####
# Program: stretcher
# Rundate: Thu 19 Mar 2015 06:42:42
# Commandline: stretcher
#   -auto
#   -stdout
#   -asequence emboss_stretcher-I20150319-064241-0831-61995903-es.asequence
#   -bsequence emboss_stretcher-I20150319-064241-0831-61995903-es.bsequence
#   -datafile EDNAFULL
#   -gapopen 16
#   -gapextend 4
#   -aformat3 pair
#   -snucleotide1
#   -snucleotide2
# Align_format: pair
# Report_file: stdout
#####
```

```
#=====
#
# Aligned_sequences: 2
# 1: EMBOSS_001
# 2: EMBOSS_001
# Matrix: EDNAFULL
# Gap_penalty: 16
# Extend_penalty: 4
#
# Length: 101
# Identity:      88/101 (87.1%)
# Similarity:   88/101 (87.1%)
# Gaps:         0/101 ( 0.0%)
# Score: 414
#
#
#=====
```

```
EMBOSS_001      1 GGAAACACACACATACAGACACCCCCACTCAGACAGTGTACAAACTAAGA      50
  |||
EMBOSS_001      1 GGAAACACACACATACAGACACCCCCACTCNNNNNNNNNNNNNACTAAGA      50

EMBOSS_001     51 AGGCCTAACTGAACTAAGCCATATTTATCACCCGTGGACAGCACATCCGA     100
  |||
EMBOSS_001     51 AGGCCTAACTGAACTAAGCCATATTTATCACCCGTGGACAGCACATCCGA     100

EMBOSS_001     101 G      101
      |
EMBOSS_001     101 G      101
```

```
#-----
#-----
```

```
#####
# Program: stretcher
# Rundate: Thu 19 Mar 2015 06:43:47
# Commandline: stretcher
#   -auto
#   -stdout
#   -asequence emboss_stretcher-I20150319-064346-0204-34702429-pg.asequence
#   -bsequence emboss_stretcher-I20150319-064346-0204-34702429-pg.bsequence
#   -datafile EDNAFULL
#   -gapopen 16
#   -gapextend 4
#   -aformat3 pair
#   -snucleotide1
#   -snucleotide2
# Align_format: pair
# Report_file: stdout
#####
```

```
#=====
#
# Aligned_sequences: 2
# 1: EMBOSS_001
# 2: EMBOSS_001
# Matrix: EDNAFULL
# Gap_penalty: 16
# Extend_penalty: 4
#
# Length: 101
# Identity:      101/101 (100.0%)
# Similarity:   101/101 (100.0%)
# Gaps:         0/101 ( 0.0%)
# Score: 505
#
#
#=====
```

```
EMBOSS_001      1 GGAAACACACACATACAGACACCCCCACTCAGACAGTGTACAAACTAAGA      50
  |||
EMBOSS_001      1 GGAAACACACACATACAGACACCCCCACTCAGACAGTGTACAAACTAAGA      50

EMBOSS_001     51 AGGCCTAACTGAACTAAGCCATATTTATCACCCGTGGACAGCACATCCGA     100
  |||
EMBOSS_001     51 AGGCCTAACTGAACTAAGCCATATTTATCACCCGTGGACAGCACATCCGA     100

EMBOSS_001     101 G      101
      |
EMBOSS_001     101 G      101
```

```
#-----
#-----
```

```
#####
# Program: stretcher
# Rundate: Thu 19 Mar 2015 06:44:32
# Commandline: stretcher
#   -auto
#   -stdout
#   -asequence emboss_stretcher-I20150319-064431-0578-74886253-oy.asequence
#   -bsequence emboss_stretcher-I20150319-064431-0578-74886253-oy.bsequence
#   -datafile EDNAFULL
#   -gapopen 16
#   -gapextend 4
#   -aformat3 pair
#   -snucleotide1
#   -snucleotide2
# Align_format: pair
# Report_file: stdout
#####
```

```
#=====
#
# Aligned_sequences: 2
# 1: EMBOSS_001
# 2: EMBOSS_001
# Matrix: EDNAFULL
# Gap_penalty: 16
# Extend_penalty: 4
#
# Length: 101
# Identity:      100/101 (99.0%)
# Similarity:    101/101 (100.0%)
# Gaps:          0/101 ( 0.0%)
# Score: 501
#
#
#=====
```

```
EMBOSS_001      1 GGAAACACACACATACAGACACCCCCACTCAGACAGTGTACAAACTAAGA      50
  |||
EMBOSS_001      1 GGAAACACACACATACAGACACCCCCACTCAGACAGTGTACAAAYTAAGA      50
  |||

EMBOSS_001     51 AGGCCTAACTGAACTAAGCCATATTTATCACCCGTGGACAGCACATCCGA     100
  |||
EMBOSS_001     51 AGGCCTAACTGAACTAAGCCATATTTATCACCCGTGGACAGCACATCCGA     100

EMBOSS_001     101 G      101
      |
EMBOSS_001     101 G      101
```

```
#-----
#-----
```

```
#####
# Program: stretcher
# Rundate: Sat 3 Jan 2015 09:24:40
# Commandline: stretcher
# -auto
# -stdout
# -asequence emboss_stretcher-I20150103-092439-0092-39846964-es.asequence
# -bsequence emboss_stretcher-I20150103-092439-0092-39846964-es.bsequence
# -datafile EDNAFULL
# -gapopen 16
# -gapextend 4
# -aformat3 pair
# -snucleotide1
# -snucleotide2
# Align_format: pair
# Report_file: stdout
#####
```

```
#=====
#
# Aligned_sequences: 2
# 1: EMBOSS_001
# 2: EMBOSS_001
# Matrix: EDNAFULL
# Gap_penalty: 16
# Extend_penalty: 4
#
# Length: 101
# Identity: 101/101 (100.0%)
# Similarity: 101/101 (100.0%)
# Gaps: 0/101 ( 0.0%)
# Score: 505
#
#
#=====
```

```
EMBOSS_001      1 GGAAACACACACATACAGACACCCCCACTCAGACAGTGTACAAACTAAGA      50
  |||
EMBOSS_001      1 GGAAACACACACATACAGACACCCCCACTCAGACAGTGTACAAACTAAGA      50

EMBOSS_001     51 AGGCCTAACTGAACTAAGCCATATTTATCACCCGTGGACAGCACATCCGA     100
  |||
EMBOSS_001     51 AGGCCTAACTGAACTAAGCCATATTTATCACCCGTGGACAGCACATCCGA     100

EMBOSS_001     101 G      101
      |
EMBOSS_001     101 G      101
```

```
#-----
#-----
```











```
#####
# Program: stretcher
# Rundate: Tue 28 Oct 2014 09:52:51
# Commandline: stretcher
# -auto
# -stdout
# -asequence emboss_stretcher-I20141028-095250-0652-15592520-pg.asequence
# -bsequence emboss_stretcher-I20141028-095250-0652-15592520-pg.bsequence
# -datafile EDNAFULL
# -gapopen 16
# -gapextend 4
# -aformat3 pair
# -snucleotide1
# -snucleotide2
# Align_format: pair
# Report_file: stdout
#####
```

```
#=====
#
# Aligned_sequences: 2
# 1: EMBOSS_001
# 2: EMBOSS_001
# Matrix: EDNAFULL
# Gap_penalty: 16
# Extend_penalty: 4
#
# Length: 101
# Identity:      101/101 (100.0%)
# Similarity:   101/101 (100.0%)
# Gaps:         0/101 ( 0.0%)
# Score: 505
#
#
#=====
```

```
EMBOSS_001      1  GGAAACACACACATACAGACACCCCCACTCAGACAGTGTACAAACTAAGA      50
  |||
EMBOSS_001      1  GGAAACACACACATACAGACACCCCCACTCAGACAGTGTACAAACTAAGA      50

EMBOSS_001     51  AGGCCTAACTGAACTAAGCCATATTTATCACCCGTGGACAGCACATCCGA     100
  |||
EMBOSS_001     51  AGGCCTAACTGAACTAAGCCATATTTATCACCCGTGGACAGCACATCCGA     100

EMBOSS_001      101 G      101
      |
EMBOSS_001      101 G      101
```

```
#-----
#-----
```

```
#####
# Program: stretcher
# Rundate: Wed 22 Oct 2014 08:36:08
# Commandline: stretcher
#   -auto
#   -stdout
#   -asequence emboss_stretcher-I20141022-083607-0131-66153080-es.asequence
#   -bsequence emboss_stretcher-I20141022-083607-0131-66153080-es.bsequence
#   -datafile EDNAFULL
#   -gapopen 16
#   -gapextend 4
#   -aformat3 pair
#   -snucleotide1
#   -snucleotide2
# Align_format: pair
# Report_file: stdout
#####
```

```
#=====
#
# Aligned_sequences: 2
# 1: EMBOSS_001
# 2: EMBOSS_001
# Matrix: EDNAFULL
# Gap_penalty: 16
# Extend_penalty: 4
#
# Length: 101
# Identity:      101/101 (100.0%)
# Similarity:   101/101 (100.0%)
# Gaps:         0/101 ( 0.0%)
# Score: 505
#
#
#=====
```

```
EMBOSS_001      1  GGAAACACACACATACAGACACCCCCACTCAGACAGTGTACAAACTAAGA      50
  |||
EMBOSS_001      1  GGAAACACACACATACAGACACCCCCACTCAGACAGTGTACAAACTAAGA      50

EMBOSS_001     51  AGGCCTAACTGAACTAAGCCATATTTATCACCCGTGGACAGCACATCCGA     100
  |||
EMBOSS_001     51  AGGCCTAACTGAACTAAGCCATATTTATCACCCGTGGACAGCACATCCGA     100

EMBOSS_001     101 G      101
      |
EMBOSS_001     101 G      101
```

```
#-----
#-----
```



```
#####
# Program: stretcher
# Rundate: Tue 13 Jan 2015 06:07:39
# Commandline: stretcher
#   -auto
#   -stdout
#   -asequence emboss_stretcher-I20150113-060738-0795-29403393-es.asequence
#   -bsequence emboss_stretcher-I20150113-060738-0795-29403393-es.bsequence
#   -datafile EDNAFULL
#   -gapopen 16
#   -gapextend 4
#   -aformat3 pair
#   -snucleotide1
#   -snucleotide2
# Align_format: pair
# Report_file: stdout
#####
```

```
#=====
#
# Aligned_sequences: 2
# 1: EMBOSS_001
# 2: EMBOSS_001
# Matrix: EDNAFULL
# Gap_penalty: 16
# Extend_penalty: 4
#
# Length: 101
# Identity:      100/101 (99.0%)
# Similarity:    100/101 (99.0%)
# Gaps:          0/101 ( 0.0%)
# Score: 496
#
#
#=====
```

```
EMBOSS_001      1 GGAAACACACACATACAGACACCCCCACTCAGACAGTGTACAAACTAAGA      50
  |||||.||||||||||||||||||||||||||||||||||||||||||
EMBOSS_001      1 GGAAACAGACACATACAGACACCCCCACTCAGACAGTGTACAAACTAAGA      50

EMBOSS_001     51 AGGCCTAACTGAACTAAGCCATATTTATCACCCGTGGACAGCACATCCGA     100
  |||||||||||||||||||||||||||||||||||||||||||||||
EMBOSS_001     51 AGGCCTAACTGAACTAAGCCATATTTATCACCCGTGGACAGCACATCCGA     100

EMBOSS_001     101 G      101
      |
EMBOSS_001     101 G      101
```

```
#-----
#-----
```

```

51 CACAACAACGTGCGCTGCCTGTGCCCGGCCGCATACACGGGCATCCTCTG 100
   |||
51 CACAACAACGTGCGCTGCCTGTGCCCGGCCGCATACACGGGCATCCTCTG 100

101 CGAGAAGCTGCGGTGCGAGGAGGCTGGCAGCTGCGGCTCCGACTCTGGCC 150
   |||
101 CGAGAAGCTGCGGTGCGAGGAGGCTGGCAGCTGTTGGCTCCGACTCCGGCC 150

151 AGGGCGCGCCCCCGCACGGCTCCCCAGCGCTGCTGCTGCTGACCACGCTG 200
   |||
151 AGGGCGCACCCCCGCACGGCTCCCCGCACGCTGCTGCTGCTGACCACGCTG 200

201 CTGGGAACCGCCAGCCCCCTGGTGTTCAGGTGTCACCTCCAGCCACACC 250
   |||
201 CTGGGACCGCCAGCCCCCTGGTGTTCAGGTGGCGCCACCGCCACACC 250

251 GGACGGGCTGTGCCGTGGGGAAGCAGACACAACCCAAACATTTGCTACT 300
   |||
251 GGACGGGCTGTGCCGTGGGGAAGCAGACACAACCCAAACATTTGCTACT 300

301 AACATAGGAAACACACACATACAGACACCCCCACTCAGACAGTGTACAAA 350
   |||
301 AACATAGGAAACACACACATACAGACACCCCCACTCAGACAGTGTACAAA 350

351 CTAAGAAGGCCTAACTGAACTAAGCCATATTTATCACCCGTGGACAGCAC 400
   |||
351 CTAAGAAGGCCTAACTGAACTAAGCCATATTTATCACCCGTGGACAGCAC 400

401 ATCCGAGTCAAGACTGTTAATTTCTGACTCCAGAGGAGTTGGCAGCTGTT 450
   |||
401 ATCCGAGTCAAGACTGTTAATTTCTGACTCCAGAGGAGTTGGCAGCTGTT 450

451 GATATTATCACTGCAAATCACATTGCCAGCTGCAGAGCATATTGTGGATT 500
   |||
451 GATATTATCACTGCAAATCACATTGCCAGCTGCAGAGCATATTGTGGATT 500

501 GGAAAGGCTGCGACAGCCCCCAAACAGGAAAGACAAAAACAACAAA- 549
   |||
501 GGAAAGGCTGCGACAGCCCCCAAACAGGAAAGACAAAAACAACAAAAC 550

550 --TCAACCGACCTAAAAACATTGGCTACTCTAGCGTGGTGCGCCCTAGTA 597
   |||
551 AATCAACCGACCTAAAAACATTGGCTACTCTAGCGTGGTGCGCCCTAGTA 600

598 CGACTCCGCCAGTGTGTGGACCAACCAATAGCATTCCTTGCTGTCAGG 647
   |||
601 CGACTCCGCCAGTGTGTGGACCAACCAATAGCATTCCTTGCTGTCAGG 650

648 TGCATTGTGGGCATAAGGAAATCTGTTACAAGCTGCCATATTGGCCTGCT 697
   |||
651 TGCATTGCGGCATAAGGAAATCAGTTACAAGCTGCCATATTGGCCTGCT 700

698 TCCGTCCCTGAATCCCTTCCAACCTGTGCTTTAGTGAACGTTGCTCTGTA 747
   |||
701 TCCGTCCCTGAATCCCTTCCAACCTGTGCTTTAGTGAACGTTGCTCTGTA 750

748 ACCCTTGTGGTTGAAAGATTTCTTTGTCTGATGTTAGTGATGCACATGT 797
   |||
751 ACCCTTGTGGTTGAAAGATTTCTTTGTCTGATGTTAGTGATGCACATGT 800

798 GTAACAGCCCCCTCTAAAAGCGCAAGCCAGTCATACCCCTGTATATCTTA 847
   |||
801 GTAACAGCCCCCTCCTAAAAGCGCAAGCCAGTCATACCCCTGTATATCTTA 850

```

```
#####
# Program: stretcher
# Rundate: Thu 19 Mar 2015 07:50:02
# Commandline: stretcher
#   -auto
#   -stdout
#   -asequence emboss_stretcher-I20150319-075001-0633-18964825-pg.asequence
#   -bsequence emboss_stretcher-I20150319-075001-0633-18964825-pg.bsequence
#   -datafile EDNAFULL
#   -gapopen 16
#   -gapextend 4
#   -aformat3 pair
#   -snucleotide1
#   -snucleotide2
# Align_format: pair
# Report_file: stdout
#####
```

```
#=====
#
# Aligned_sequences: 2
# 1: EMBOSS_001
# 2: EMBOSS_001
# Matrix: EDNAFULL
# Gap_penalty: 16
# Extend_penalty: 4
#
# Length: 101
# Identity:      101/101 (100.0%)
# Similarity:    101/101 (100.0%)
# Gaps:          0/101 ( 0.0%)
# Score: 505
#
#
#=====
```

```
EMBOSS_001      1 GGAAACACACACATACAGACACCCCCACTCAGACAGTGTACAAACTAAGA      50
                  |||
EMBOSS_001      1 GGAAACACACACATACAGACACCCCCACTCAGACAGTGTACAAACTAAGA      50

EMBOSS_001     51 AGGCCTAACTGAACTAAGCCATATTTATCACCCGTGGACAGCACATCCGA     100
                  |||
EMBOSS_001     51 AGGCCTAACTGAACTAAGCCATATTTATCACCCGTGGACAGCACATCCGA     100

EMBOSS_001     101 G          101
                   |
EMBOSS_001     101 G          101
```

```
#-----
#-----
```



```

51 CACAACAACGTGCGCTGCCTGTGCCCGGCCGATACACGGGCATCCTCTG 100
   |||.|||||.|||||.|||||.|||||.|||||.|||||.|||||.|||||.
51 CAGAACAATGTGCGCTGCGCGTGCCAGACGCCTACACCGGCATCCTCTG 100

101 CGAGAAGCTGCGGTGCGAGGAGGCTGGCAGCTGCGGCTCCGACTCTGGCC 150
   .|||||.|||||.|||||.|||||.|||||.|||||.|||||.|||||.
101 TGAGAAGCTACGGTGCGAAGAGGCGGGCAGCTGTGGCTCCGAATCCGGCC 150

151 AGGGCGCGCCCCCGCACGGCTCCCCAGCGCTGCTGCTGCTGACCACGCTG 200
   |||||.|||.|||||.|||||.|||||.|||||.|||||.|||||.|||||.
151 AGGGAGCACCCCCGCGGGGCTCCCCAGCAC'TGCTGCTGCTGACCATGCTG 200

201 CTGGGAACCGCCAGCCCCCTGGTGTTC'TAGGTGTCACCTCCAGCCACACC 250
   |||||.|||.|||||.|||||.|||||.|||||.|||||.|||||.|||||.
201 CTGGGGACTGCCGGTCCCCTGGTGTTC'TAGGGGTCACACCAGCC-CTCC 249

251 GGACGGGCTGTGCCGTGGGGAAGCAGACACAACCCAAACATTTGCTACT 300
   | |||.|||||.|||||.|||||.|||||.|||||.|||||.|||||.
250 G-ACAGGCCTGTGCTGTGGGGAAGCAAACACAACCCAAAGCGATTGCCACT 298

301 AACATAGGAAACACACACATACAGACACCCCCACTCAGACAGTGTACAAA 350
   .|||||.|||||.|||||.|||||.|||||.|||||.|||||.|||||.
299 GACATAGAAAACACGCACA-----CCCACTCCAACACAGTGTATAAA 340

351 CTAAGAAGGCCTAACTGAACTAAGCCATATTTATCACCCGTGGACAGCAC 400
   ..|||||.|||||.|||||.|||||.|||||.|||||.|||||.|||||.
341 AGAAGAGGGCCTAACTGAACTAAGCCATATCTCTCAGAACCGGACAGCAC 390

401 ATCC-----GAGTCAAGACTGTTAATTTCTGACTCCAGAGGAGTTGGC 443
   |||||.|||||.|||||.|||||.|||||.|||||.|||||.|||||.
391 ATCGCACATCGGAGTTGAGACTGTTCATCATTGACTCCAGAGGAATTGGC 440

444 AGCTGTTGATATTATCACTGCAAATCATTGCCAGCTGCAGAGCATATT 493
   |||||.|||||.|||||.|||||.|||||.|||||.|||||.|||||.
441 AGCTGTTGCTATTCTCACTGCAAATCTCATTGCCAGCTGCAGAGCTGATT 490

494 GTGGATTGAAAGGCTGCGACAGCCCCCAAACAGGAAAGACAAAAAACA 543
   |.|||||.|||||.|||||.|||||.|||||.|||||.|||||.|||||.
491 GCGGATTGAAAGGCTGTGAGAGCGCCCCAAAGAGGAAAGACGGAAAACA 540

544 AACAAATCAACCGACCTAAAAACATTGGCTACTCTAGCGTGGTGCGCCCT 593
   |||.|||.|||||.|||||.|||||.|||||.|||||.|||||.|||||.
541 AACTGATCAACCAACCTAAAAACATTGCTACTCTACCGTGGTGCACCCT 590

594 AGTACGACTCCGCCAGTGTGTGGACCAACCAAATA--GCATTCTTTGC 640
   |||||.|||.|||||.|||||.|||||.|||||.|||||.|||||.
591 AGTACCGCTCTGCTCAGTGTGTGGGCCAACCAAATAAAAGCATTCTTCGC 640

641 TGTCAGGTGCATTGTGGGCATAAGGAAATCTGTTACAAGCTGCCATATTG 690
   |||||.|||||.|||||.|||||.|||||.|||||.|||||.|||||.
641 TGTCAGGTGCATTGTGGGTATAAGGAAATCTGTTACAAGCTGCCATATTG 690

691 GCCTGCTTCCGTCCCTG-----AATCCCTTCCAACCTGTGCTTTAG 731
   |||||.|||||.|||||.|||||.|||||.|||||.|||||.|||||.
691 GCCTGCTTCAGTCCCCCGACCCCAAATCCCTTCCAACCTGTGCTTTAG 740

732 TGAACGTTGCTCTGTAACCCTTGTGGTTGAAAGATTTCTTTGTCTGATG 781
   |||||.|||||.|||||.|||||.|||||.|||||.|||||.|||||.
741 TGAACGTTGCTCTGTAACCCTTGTGGTTGAAAGATTTCTTTGTCTGATG 790

782 TTAGTGATGCACATGTGTAACAGCCCCCTCTAAAAGCGCAAGCCAGTCAT 831
   |||||.|||||.|||||.|||||.|||||.|||||.|||||.|||||.
791 TTAGTGATACACACGTGTAACAGCCCCCTCCTAAA-GCGCAAGCCAGTCAT 839
    
```

```
#####
# Program: stretcher
# Rundate: Thu 19 Mar 2015 08:43:39
# Commandline: stretcher
# -auto
# -stdout
# -asequence emboss_stretcher-I20150319-084338-0451-20007450-pg.asequence
# -bsequence emboss_stretcher-I20150319-084338-0451-20007450-pg.bsequence
# -datafile EDNAFULL
# -gapopen 16
# -gapextend 4
# -aformat3 pair
# -snucleotide1
# -snucleotide2
# Align_format: pair
# Report_file: stdout
#####
```

```
#=====
#
# Aligned_sequences: 2
# 1: EMBOSS_001
# 2: EMBOSS_001
# Matrix: EDNAFULL
# Gap_penalty: 16
# Extend_penalty: 4
#
# Length: 103
# Identity:      75/103 (72.8%)
# Similarity:   75/103 (72.8%)
# Gaps:         4/103 ( 3.9%)
# Score: 227
#
#
#=====
```

```
EMBOSS_001      1  GGAAACACACACATACAGACACCCCCACTC--AGACAGTGTACAAACTAA      48
      ...| ||.|.| |.||||..|||.||||||| |.|||||||.||||..||
EMBOSS_001      1  CTGA-CATAGA-AAACACGCACCCCACTCCAACACAGTGTATAAAAAGAA      48

EMBOSS_001     49  GAAGGCCTAACTGAACTAAGCCATATTTATCACCCGTGGACAGCACATCC      98
      ||.|||||||||||||||||||||||||.|.|||. . . . .| . . . . .|
EMBOSS_001     49  GAGGGCCTAACTGAACTAAGCCATATCTCTCAGAACCGGACAGCACATCG      98

EMBOSS_001     99  GAG      101
      .|.
EMBOSS_001     99  CAC      101
```

```
#-----
#-----
```

rs1105684

```
#####
# Program: stretcher
# Rundate: Wed 14 Jan 2015 06:31:39
# Commandline: stretcher
#   -auto
#   -stdout
#   -asequence emboss_stretcher-I20150114-063138-0457-77792412-oy.asequence
#   -bsequence emboss_stretcher-I20150114-063138-0457-77792412-oy.bsequence
#   -datafile EDNAFULL
#   -gapopen 16
#   -gapextend 4
#   -aformat3 pair
#   -snucleotide1
#   -snucleotide2
# Align_format: pair
# Report_file: stdout
#####
```

```
#=====
#
# Aligned_sequences: 2
# 1: EMBOSS_001
# 2: EMBOSS_001
# Matrix: EDNAFULL
# Gap_penalty: 16
# Extend_penalty: 4
#
# Length: 101
# Identity:      101/101 (100.0%)
# Similarity:   101/101 (100.0%)
# Gaps:         0/101 ( 0.0%)
# Score: 505
#
#
#=====
```

```
EMBOSS_001      1 GTTGTAACACATTTTTCCCCTGGCAGATTTTGTGTTGTTAGGGTTTTT      50
  |||
EMBOSS_001      1 GTTGTAACACATTTTTCCCCTGGCAGATTTTGTGTTGTTAGGGTTTTT      50

EMBOSS_001     51 TAAATTTATTTATTTTCCAGGGAATGCGTGGCATTAAACCAACAGGACT     100
  |||
EMBOSS_001     51 TAAATTTATTTATTTTCCAGGGAATGCGTGGCATTAAACCAACAGGACT     100

EMBOSS_001      101 G      101
      |
EMBOSS_001      101 G      101
```

```
#-----
#-----
```

```
#####
# Program: stretcher
# Rundate: Thu 19 Mar 2015 09:14:29
# Commandline: stretcher
#   -auto
#   -stdout
#   -asequence emboss_stretcher-I20150319-091428-0205-78380387-oy.asequence
#   -bsequence emboss_stretcher-I20150319-091428-0205-78380387-oy.bsequence
#   -datafile EDNAFULL
#   -gapopen 16
#   -gapextend 4
#   -aformat3 pair
#   -snucleotide1
#   -snucleotide2
# Align_format: pair
# Report_file: stdout
#####
```

```
#=====
#
# Aligned_sequences: 2
# 1: EMBOSS_001
# 2: EMBOSS_001
# Matrix: EDNAFULL
# Gap_penalty: 16
# Extend_penalty: 4
#
# Length: 101
# Identity:      89/101 (88.1%)
# Similarity:    89/101 (88.1%)
# Gaps:          0/101 ( 0.0%)
# Score: 421
#
#
#=====
```

```
EMBOSS_001      1 GTTGTAACACATTTTTCCCTGGCAGATTTTGTGTTGTTAGGGTTTTT      50
  |||
EMBOSS_001      1 GTTGTAACACATTTTTCCCTGGCAGATTTTGTGTTGTTNNNNNNNNN      50

EMBOSS_001     51 TAAATTTATTTATTTTCCAGGGAATGCGTGCCATTTAAACCAACAGGACT     100
  ... |||
EMBOSS_001     51 NNNATTTATTTATTTTCCAGGGAATGCGTGCCATTTAAACCAACAGGACT     100

EMBOSS_001     101 G      101
      |
EMBOSS_001     101 G      101
```

```
#-----
#-----
```

```
#####
# Program: stretcher
# Rundate: Thu 19 Mar 2015 09:15:26
# Commandline: stretcher
#   -auto
#   -stdout
#   -asequence emboss_stretcher-I20150319-091525-0046-76679205-pg.asequence
#   -bsequence emboss_stretcher-I20150319-091525-0046-76679205-pg.bsequence
#   -datafile EDNAFULL
#   -gapopen 16
#   -gapextend 4
#   -aformat3 pair
#   -snucleotide1
#   -snucleotide2
# Align_format: pair
# Report_file: stdout
#####
```

```
#=====
#
# Aligned_sequences: 2
# 1: EMBOSS_001
# 2: EMBOSS_001
# Matrix: EDNAFULL
# Gap_penalty: 16
# Extend_penalty: 4
#
# Length: 101
# Identity:      97/101 (96.0%)
# Similarity:   97/101 (96.0%)
# Gaps:         0/101 ( 0.0%)
# Score: 477
#
#
#=====
```

```
EMBOSS_001      1 GTTGTAACACATTTTTCCCCTGGCAGATTTTGTGTTGTTAGGGTTTTT      50
  |||
EMBOSS_001      1 GTTGTAACACATTTTTCCCCTGGCAGATTTTGTGTTGTTAGGGTTTTN      50

EMBOSS_001     51 TAAATTTATTTATTTTCCAGGGAATGCGTGGCATTAAACCAACAGGACT      100
  ..|||
EMBOSS_001     51 NNAATTTATTTATTTTCCAGGGAATGCGNGGCATTAAACCAACAGGACT      100

EMBOSS_001     101 G      101
      |
EMBOSS_001     101 G      101
```

```
#-----
#-----
```



```
#####
# Program: stretcher
# Rundate: Sat 3 Jan 2015 09:28:07
# Commandline: stretcher
# -auto
# -stdout
# -asequence emboss_stretcher-I20150103-092806-0234-19525660-pg.asequence
# -bsequence emboss_stretcher-I20150103-092806-0234-19525660-pg.bsequence
# -datafile EDNAFULL
# -gapopen 16
# -gapextend 4
# -aformat3 pair
# -snucleotide1
# -snucleotide2
# Align_format: pair
# Report_file: stdout
#####
```

```
#=====
#
# Aligned_sequences: 2
# 1: EMBOSS_001
# 2: EMBOSS_001
# Matrix: EDNAFULL
# Gap_penalty: 16
# Extend_penalty: 4
#
# Length: 101
# Identity: 101/101 (100.0%)
# Similarity: 101/101 (100.0%)
# Gaps: 0/101 ( 0.0%)
# Score: 505
#
#
#=====
```

```
EMBOSS_001      1 GTTGTA AACACATTTTTCCCTGGCAGATTTTGTGTTGTTAGGGTTTTT      50
  |||
EMBOSS_001      1 GTTGTA AACACATTTTTCCCTGGCAGATTTTGTGTTGTTAGGGTTTTT      50

EMBOSS_001     51 TAAATTTATTTATTTTCCAGGGAATGCGTGGCATTTAAACCAACAGGACT     100
  |||
EMBOSS_001     51 TAAATTTATTTATTTTCCAGGGAATGCGTGGCATTTAAACCAACAGGACT     100

EMBOSS_001      101 G      101
      |
EMBOSS_001      101 G      101
```

```
#-----
#-----
```



```
#####
# Program: stretcher
# Rundate: Fri 26 Dec 2014 08:13:18
# Commandline: stretcher
#   -auto
#   -stdout
#   -asequence emboss_stretcher-I20141226-081316-0927-90647123-oy.asequence
#   -bsequence emboss_stretcher-I20141226-081316-0927-90647123-oy.bsequence
#   -datafile EDNAFULL
#   -gapopen 16
#   -gapextend 4
#   -aformat3 pair
#   -snucleotide1
#   -snucleotide2
# Align_format: pair
# Report_file: stdout
#####
```

```
#=====
#
# Aligned_sequences: 2
# 1: EMBOSS_001
# 2: EMBOSS_001
# Matrix: EDNAFULL
# Gap_penalty: 16
# Extend_penalty: 4
#
# Length: 101
# Identity:      98/101 (97.0%)
# Similarity:   98/101 (97.0%)
# Gaps:         0/101 ( 0.0%)
# Score: 484
#
#
#=====
```

```
EMBOSS_001      1 GTTGTA AACACATTTTTCCCTGGCAGATTTTGTGTTGTTAGGGTTTTT      50
  |||
EMBOSS_001      1 GTTGTA AACACATTTTTCCCTGGCAGATTTTGTGTTGTTAGGGTTTTT      50

EMBOSS_001     51 TAAATTTATTTATTTTCCAGGGAATGCGTGGCATTAAACCAACAGGACT     100
  |||
EMBOSS_001     51 TAAATTTATTTATTTTCCNAGGNAANGCGTGGCATTAAACCAACAGGACT     100

EMBOSS_001     101 G      101
      |
EMBOSS_001     101 G      101
```

```
#-----
#-----
```



```
#####
# Program: stretcher
# Rundate: Thu 19 Mar 2015 09:23:14
# Commandline: stretcher
#   -auto
#   -stdout
#   -asequence emboss_stretcher-I20150319-092313-0347-81101365-oy.asequence
#   -bsequence emboss_stretcher-I20150319-092313-0347-81101365-oy.bsequence
#   -datafile EDNAFULL
#   -gapopen 16
#   -gapextend 4
#   -aformat3 pair
#   -snucleotide1
#   -snucleotide2
# Align_format: pair
# Report_file: stdout
#####
```

```
#=====
#
# Aligned_sequences: 2
# 1: EMBOSS_001
# 2: EMBOSS_001
# Matrix: EDNAFULL
# Gap_penalty: 16
# Extend_penalty: 4
#
# Length: 101
# Identity:      3/101 ( 3.0%)
# Similarity:   3/101 ( 3.0%)
# Gaps:         0/101 ( 0.0%)
# Score: -181
#
#
#=====
```

```
EMBOSS_001      1 GTTGTAACACATTTTTCCCTGGCAGATTTGTGTTGTTAGGGTTTTT      50
                  .....
EMBOSS_001      1 NNNNNNNNNNNNNNNNNNNNNNNNNNNNNNNNNNNNNNNNNNNNNNNNNNNNN      50

EMBOSS_001     51 TAAATTTATTTATTTTCCAGGGAATGCGTGGCATTAAACCAACAGGACT     100
                  ..... ||
EMBOSS_001     51 NNNNNNNNNNNNNNNNNNNNNNNNNNNNNNNNNNNNNNNNNNNNNNNNNNNCT     100

EMBOSS_001     101 G      101
                   |
EMBOSS_001     101 G      101
```

```
#-----
#-----
```



```
#####
# Program: stretcher
# Rundate: Wed 29 Oct 2014 04:05:21
# Commandline: stretcher
# -auto
# -stdout
# -asequence emboss_stretcher-I20141029-040520-0352-93320313-pg.asequence
# -bsequence emboss_stretcher-I20141029-040520-0352-93320313-pg.bsequence
# -datafile EDNAFULL
# -gapopen 16
# -gapextend 4
# -aformat3 pair
# -snucleotide1
# -snucleotide2
# Align_format: pair
# Report_file: stdout
#####
```

```
#=====
#
# Aligned_sequences: 2
# 1: EMBOSS_001
# 2: EMBOSS_001
# Matrix: EDNAFULL
# Gap_penalty: 16
# Extend_penalty: 4
#
# Length: 101
# Identity:      101/101 (100.0%)
# Similarity:   101/101 (100.0%)
# Gaps:         0/101 ( 0.0%)
# Score: 505
#
#
#=====
```

```
EMBOSS_001      1 GTTGTA AACACATTTTTC CCGTGGCAGATTTTGT TGTGTTAGGGTTTTT      50
                  |||
EMBOSS_001      1 GTTGTA AACACATTTTTC CCGTGGCAGATTTTGT TGTGTTAGGGTTTTT      50

EMBOSS_001     51 TAAATTTATTTATTTTCCAGGGAATGCGTGGCATTTAAACCAACAGGACT      100
                  |||
EMBOSS_001     51 TAAATTTATTTATTTTCCAGGGAATGCGTGGCATTTAAACCAACAGGACT      100

EMBOSS_001      101 G      101
                   |
EMBOSS_001      101 G      101
```

```
#-----
#-----
```

```
#####
# Program: stretcher
# Rundate: Thu 23 Oct 2014 05:33:24
# Commandline: stretcher
# -auto
# -stdout
# -asequence emboss_stretcher-I20141023-053323-0154-3899619-es.asequence
# -bsequence emboss_stretcher-I20141023-053323-0154-3899619-es.bsequence
# -datafile EDNAFULL
# -gapopen 16
# -gapextend 4
# -aformat3 pair
# -snucleotide1
# -snucleotide2
# Align_format: pair
# Report_file: stdout
#####
```

```
#=====
#
# Aligned_sequences: 2
# 1: EMBOSS_001
# 2: EMBOSS_001
# Matrix: EDNAFULL
# Gap_penalty: 16
# Extend_penalty: 4
#
# Length: 101
# Identity:      101/101 (100.0%)
# Similarity:   101/101 (100.0%)
# Gaps:         0/101 ( 0.0%)
# Score: 505
#
#
#=====
```

```
EMBOSS_001      1 GTTGTA AACACATTTTCC CCTGGCAGATTTGTTGTTGTTAGGGTTTTT      50
  |||
EMBOSS_001      1 GTTGTA AACACATTTTCC CCTGGCAGATTTGTTGTTGTTAGGGTTTTT      50

EMBOSS_001     51 TAAATTTATTTATTTTCCAGGGAATGCGTGGCATTAAACCAACAGGACT      100
  |||
EMBOSS_001     51 TAAATTTATTTATTTTCCAGGGAATGCGTGGCATTAAACCAACAGGACT      100

EMBOSS_001      101 G      101
      |
EMBOSS_001      101 G      101
```

```
#-----
#-----
```

```
#####
# Program: stretcher
# Rundate: Sat 15 Nov 2014 05:04:20
# Commandline: stretcher
#   -auto
#   -stdout
#   -asequence emboss_stretcher-I20141115-050419-0115-58853989-pg.asequence
#   -bsequence emboss_stretcher-I20141115-050419-0115-58853989-pg.bsequence
#   -datafile EDNAFULL
#   -gapopen 16
#   -gapextend 4
#   -aformat3 pair
#   -snucleotide1
#   -snucleotide2
# Align_format: pair
# Report_file: stdout
#####
```

```
#=====
#
# Aligned_sequences: 2
# 1: EMBOSS_001
# 2: EMBOSS_001
# Matrix: EDNAFULL
# Gap_penalty: 16
# Extend_penalty: 4
#
# Length: 101
# Identity:      0/101 ( 0.0%)
# Similarity:   0/101 ( 0.0%)
# Gaps:         0/101 ( 0.0%)
# Score: -202
#
#
#=====
```

```
EMBOSS_001      1 GTTGTAACACATTTTCCCTGGCAGATTTGTTGTTGTTAGGGTTTTT      50
                  .....
EMBOSS_001      1 NNNNNNNNNNNNNNNNNNNNNNNNNNNNNNNNNNNNNNNNNNNNNNNNNNNNNNN      50

EMBOSS_001     51 TAAATTTATTTATTTTCCAGGGAATGCGTGGCATTTAAACCAACAGGACT     100
                  .....
EMBOSS_001     51 NNNNNNNNNNNNNNNNNNNNNNNNNNNNNNNNNNNNNNNNNNNNNNNNNNNNNNN     100

EMBOSS_001     101 G      101
                   .
EMBOSS_001     101 N      101
```

```
#-----
#-----
```

```
#####
# Program: stretcher
# Rundate: Tue 13 Jan 2015 07:07:06
# Commandline: stretcher
#   -auto
#   -stdout
#   -asequence emboss_stretcher-I20150113-070705-0375-30400762-es.asequence
#   -bsequence emboss_stretcher-I20150113-070705-0375-30400762-es.bsequence
#   -datafile EDNAFULL
#   -gapopen 16
#   -gapextend 4
#   -aformat3 pair
#   -snucleotide1
#   -snucleotide2
# Align_format: pair
# Report_file: stdout
#####
```

```
#=====
#
# Aligned_sequences: 2
# 1: EMBOSS_001
# 2: EMBOSS_001
# Matrix: EDNAFULL
# Gap_penalty: 16
# Extend_penalty: 4
#
# Length: 101
# Identity:      99/101 (98.0%)
# Similarity:   99/101 (98.0%)
# Gaps:         0/101 ( 0.0%)
# Score: 487
#
#
#=====
```

```
EMBOSS_001      1 GTTGTAACACATTTTTCCCTGGCAGATTTTGTGTTGTTAGGGTTTTT      50
  |||
EMBOSS_001      1 GTTGTAACACATTTTTACCCTGGCAGATTTTGTGCTGTTAGGGTTTTT      50
  |||
EMBOSS_001     51 TAAATTTATTTATTTTCCAGGGAATGCGTGGCATTAAACCAACAGGACT     100
  |||
EMBOSS_001     51 TAAATTTATTTATTTTCCAGGGAATGCGTGGCATTAAACCAACAGGACT     100
  |||
EMBOSS_001     101 G      101
      |
EMBOSS_001     101 G      101
```

```
#-----
#-----
```





```
#####
# Program: stretcher
# Rundate: Thu 23 Oct 2014 08:26:01
# Commandline: stretcher
# -auto
# -stdout
# -asequence emboss_stretcher-I20141023-082559-0977-10064285-pg.asequence
# -bsequence emboss_stretcher-I20141023-082559-0977-10064285-pg.bsequence
# -datafile EDNAFULL
# -gapopen 16
# -gapextend 4
# -aformat3 pair
# -snucleotide1
# -snucleotide2
# Align_format: pair
# Report_file: stdout
#####

#=====
#
# Aligned_sequences: 2
# 1: EMBOSS_001
# 2: EMBOSS_001
# Matrix: EDNAFULL
# Gap_penalty: 16
# Extend_penalty: 4
#
# Length: 103
# Identity:      90/103 (87.4%)
# Similarity:   90/103 (87.4%)
# Gaps:         4/103 ( 3.9%)
# Score: 374
#
#
#=====

EMBOSS_001      1  --GTTGTA AACACATTTTTCC CCTGGCAGATTTTGT TGTGTTAGGGTTT      48
                |||
EMBOSS_001      1  TAGTTGTA AACACATTTTTCC CCTGGCAGATTTTGT TGGTGGT--GGTTT      48

EMBOSS_001     49  TTTAAATTTATTTATTTTCCAGGGAATGCGTGGCATTAAACCAACAGGA      98
                |||. . . |||. . |||
EMBOSS_001     49  TTTTCTTTTTTTAATTTTCCAGGGAATGCGTGGCATTAAAGCCAACAGAA      98

EMBOSS_001     99  CTG      101
                |||
EMBOSS_001     99  CTG      101

#-----
#-----
```



```
#####
# Program: stretcher
# Rundate: Thu 23 Oct 2014 09:39:20
# Commandline: stretcher
# -auto
# -stdout
# -asequence emboss_stretcher-I20141023-093919-0117-64930026-es.asequence
# -bsequence emboss_stretcher-I20141023-093919-0117-64930026-es.bsequence
# -datafile EDNAFULL
# -gapopen 16
# -gapextend 4
# -aformat3 pair
# -snucleotide1
# -snucleotide2
# Align_format: pair
# Report_file: stdout
#####
```

```
#=====
#
# Aligned_sequences: 2
# 1: EMBOSS_001
# 2: EMBOSS_001
# Matrix: EDNAFULL
# Gap_penalty: 16
# Extend_penalty: 4
#
# Length: 112
# Identity:      69/112 (61.6%)
# Similarity:   69/112 (61.6%)
# Gaps:         22/112 (19.6%)
# Score: 137
#
#
#=====
```

```
EMBOSS_001      1 -----GTTGTAACACATTTTTCCCCTGGCAGATTTTGTGTTG      39
                  |||
EMBOSS_001      1 CTGATTGACGGGTTGTAACACATTTT-CCCCTGGCAGATTTTGTGTT-      48
EMBOSS_001     40 TTAGGGTTTTTTTAAATTTATTTATTTTCCAGGGAATGCGTGGCATTAAA      89
                  |.....|
EMBOSS_001     49 -----TCCCCACCCCCATTTTCTAGGGATTGTGTGGTGCTTAAA      89

EMBOSS_001     90 CCAACAGGACTG      101
                  |||
EMBOSS_001     90 CCAACAAAATTG      101
```

```
#-----
#-----
```

rs7851893

```
#####
# Program: stretcher
# Rundate: Wed 14 Jan 2015 06:34:09
# Commandline: stretcher
#   -auto
#   -stdout
#   -asequence emboss_stretcher-I20150114-063408-0697-53926784-pg.asequence
#   -bsequence emboss_stretcher-I20150114-063408-0697-53926784-pg.bsequence
#   -datafile EDNAFULL
#   -gapopen 16
#   -gapextend 4
#   -aformat3 pair
#   -snucleotide1
#   -snucleotide2
# Align_format: pair
# Report_file: stdout
#####
```

```
#=====
#
# Aligned_sequences: 2
# 1: EMBOSS_001
# 2: EMBOSS_001
# Matrix: EDNAFULL
# Gap_penalty: 16
# Extend_penalty: 4
#
# Length: 101
# Identity:      101/101 (100.0%)
# Similarity:   101/101 (100.0%)
# Gaps:         0/101 ( 0.0%)
# Score: 505
#
#
#=====
```

```
EMBOSS_001      1 ATTTTACTACATTTTCTCAGGTTGCAAAAATAGACACCGGGCAGGTTCT      50
  |||
EMBOSS_001      1 ATTTTACTACATTTTCTCAGGTTGCAAAAATAGACACCGGGCAGGTTCT      50

EMBOSS_001     51 GTCTTAGAGTTTTCTAGCAAGGAGCGCCTTCAAGGCCAGGCAGGCTCTGT     100
  |||
EMBOSS_001     51 GTCTTAGAGTTTTCTAGCAAGGAGCGCCTTCAAGGCCAGGCAGGCTCTGT     100

EMBOSS_001     101 A      101
      |
EMBOSS_001     101 A      101
```

```
#-----
#-----
```

```
#####
# Program: stretcher
# Rundate: Thu 19 Mar 2015 22:40:35
# Commandline: stretcher
#   -auto
#   -stdout
#   -asequence emboss_stretcher-I20150319-224034-0837-49339237-oy.asequence
#   -bsequence emboss_stretcher-I20150319-224034-0837-49339237-oy.bsequence
#   -datafile EDNAFULL
#   -gapopen 16
#   -gapextend 4
#   -aformat3 pair
#   -snucleotide1
#   -snucleotide2
# Align_format: pair
# Report_file: stdout
#####
```

```
#=====
#
# Aligned_sequences: 2
# 1: EMBOSS_001
# 2: EMBOSS_001
# Matrix: EDNAFULL
# Gap_penalty: 16
# Extend_penalty: 4
#
# Length: 101
# Identity:      43/101 (42.6%)
# Similarity:    43/101 (42.6%)
# Gaps:          0/101 ( 0.0%)
# Score: 99
#
#
#=====
```

```
EMBOSS_001      1 ATTTTACTACATTTTCTCAGGTTGCAAAAATAGACACCGGGCAGTTCT      50
                  |||...
EMBOSS_001      1 ATTTTACTACATTTTCTCAGGTTGCNNNNNNNNNNNNNNNNNNNNNNNN      50

EMBOSS_001     51 GTCTTAGAGTTTCTAGCAAGGAGCGCCTTCAAGGCCAGGCAGGCTCTGT     100
                  .....|
EMBOSS_001     51 NNNNNNNNNNNNNNNNNNNNNNNNNNNNNNNNNNNNNNNNGCCAGGCAGGCTCTGT     100

EMBOSS_001     101 A      101
                   |
EMBOSS_001     101 A      101
```

```
#-----
#-----
```

```
#####
# Program: stretcher
# Rundate: Thu 19 Mar 2015 22:43:02
# Commandline: stretcher
#   -auto
#   -stdout
#   -asequence emboss_stretcher-I20150319-224300-0848-31715737-es.asequence
#   -bsequence emboss_stretcher-I20150319-224300-0848-31715737-es.bsequence
#   -datafile EDNAFULL
#   -gapopen 16
#   -gapextend 4
#   -aformat3 pair
#   -snucleotide1
#   -snucleotide2
# Align_format: pair
# Report_file: stdout
#####
```

```
#=====
#
# Aligned_sequences: 2
# 1: EMBOSS_001
# 2: EMBOSS_001
# Matrix: EDNAFULL
# Gap_penalty: 16
# Extend_penalty: 4
#
# Length: 101
# Identity:      98/101 (97.0%)
# Similarity:   98/101 (97.0%)
# Gaps:         0/101 ( 0.0%)
# Score: 484
#
#
#=====
```

```
EMBOSS_001      1 ATTTTACTACATTTTCTCAGGTTGCAAAAATAGACACCGGGCAGGTTCT      50
  |||...|||
EMBOSS_001      1 ATTTTACTACATTTTCTCAGGNNNCAAAAATAGACACCGGGCAGGTTCT      50

EMBOSS_001     51 GTCTTAGAGTTTTCTAGCAAGGAGCGCCTTCAAGGCCAGGCAGGCTCTGT     100
  |||...|||
EMBOSS_001     51 GTCTTAGAGTTTTCTAGCAAGGAGCGCCTTCAAGGCCAGGCAGGCTCTGT     100

EMBOSS_001     101 A      101
      |
EMBOSS_001     101 A      101
```

```
#-----
#-----
```





```
#####
# Program: stretcher
# Rundate: Sat 3 Jan 2015 09:29:08
# Commandline: stretcher
# -auto
# -stdout
# -asequence emboss_stretcher-I20150103-092907-0267-68991030-oy.asequence
# -bsequence emboss_stretcher-I20150103-092907-0267-68991030-oy.bsequence
# -datafile EDNAFULL
# -gapopen 16
# -gapextend 4
# -aformat3 pair
# -snucleotide1
# -snucleotide2
# Align_format: pair
# Report_file: stdout
#####
```

```
#=====
#
# Aligned_sequences: 2
# 1: EMBOSS_001
# 2: EMBOSS_001
# Matrix: EDNAFULL
# Gap_penalty: 16
# Extend_penalty: 4
#
# Length: 101
# Identity: 101/101 (100.0%)
# Similarity: 101/101 (100.0%)
# Gaps: 0/101 ( 0.0%)
# Score: 505
#
#
#=====
```

```
EMBOSS_001      1 ATTTTACTACATTTTCTCAGGTTGCAAAAATAGACACCGGGCAGGTTCT      50
  |||
EMBOSS_001      1 ATTTTACTACATTTTCTCAGGTTGCAAAAATAGACACCGGGCAGGTTCT      50

EMBOSS_001     51 GTCTTAGAGTTTTCTAGCAAGGAGCGCCTTCAAGGCCAGGCAGGCTCTGT     100
  |||
EMBOSS_001     51 GTCTTAGAGTTTTCTAGCAAGGAGCGCCTTCAAGGCCAGGCAGGCTCTGT     100

EMBOSS_001     101 A      101
      |
EMBOSS_001     101 A      101
```

```
#-----
#-----
```

```
#####
# Program: stretcher
# Rundate: Fri 26 Dec 2014 08:17:50
# Commandline: stretcher
#   -auto
#   -stdout
#   -asequence emboss_stretcher-I20141226-081749-0514-98004358-oy.asequence
#   -bsequence emboss_stretcher-I20141226-081749-0514-98004358-oy.bsequence
#   -datafile EDNAFULL
#   -gapopen 16
#   -gapextend 4
#   -aformat3 pair
#   -snucleotide1
#   -snucleotide2
# Align_format: pair
# Report_file: stdout
#####
```

```
#=====
#
# Aligned_sequences: 2
# 1: EMBOSS_001
# 2: EMBOSS_001
# Matrix: EDNAFULL
# Gap_penalty: 16
# Extend_penalty: 4
#
# Length: 101
# Identity:      101/101 (100.0%)
# Similarity:   101/101 (100.0%)
# Gaps:         0/101 ( 0.0%)
# Score: 505
#
#
#=====
```

```
EMBOSS_001      1 ATTTTACTACATTTTCTCAGGTTGCAAAAATAGACACCGGGCAGGTTCT      50
  |||
EMBOSS_001      1 ATTTTACTACATTTTCTCAGGTTGCAAAAATAGACACCGGGCAGGTTCT      50

EMBOSS_001     51 GTCTTAGAGTTTTCTAGCAAGGAGCGCCTTCAAGGCCAGGCAGGCTCTGT     100
  |||
EMBOSS_001     51 GTCTTAGAGTTTTCTAGCAAGGAGCGCCTTCAAGGCCAGGCAGGCTCTGT     100

EMBOSS_001     101 A      101
      |
EMBOSS_001     101 A      101
```

```
#-----
#-----
```

```
#####
# Program: stretcher
# Rundate: Sun 4 Jan 2015 08:00:03
# Commandline: stretcher
# -auto
# -stdout
# -asequence emboss_stretcher-I20150104-080002-0458-60844687-oy.asequence
# -bsequence emboss_stretcher-I20150104-080002-0458-60844687-oy.bsequence
# -datafile EDNAFULL
# -gapopen 16
# -gapextend 4
# -aformat3 pair
# -snucleotide1
# -snucleotide2
# Align_format: pair
# Report_file: stdout
#####
```

```
#=====
#
# Aligned_sequences: 2
# 1: EMBOSS_001
# 2: EMBOSS_001
# Matrix: EDNAFULL
# Gap_penalty: 16
# Extend_penalty: 4
#
# Length: 101
# Identity:      62/101 (61.4%)
# Similarity:   62/101 (61.4%)
# Gaps:         0/101 ( 0.0%)
# Score: 232
#
#
#=====
```

```
EMBOSS_001      1 ATTTTACTACATTTTCTCAGGTTGCAAAAATAGACACCGGGCAGTTCT      50
  |||||.|.|.|.|.|.|.|.|.|.|.|.|.|.|.|.|.|.|.|.|.|.|.|
EMBOSS_001      1 ATTTTANTNCNTTNTCTCAGGTTGCAAAAATAGACACCGGGCAGTTCT      50

EMBOSS_001     51 GTCTTAGAGTTTCTAGCAAGGAGCGCCTCAAGGCCAGGCAGGCTCTGT     100
  |||||.|.|.|.|.|.|.|.|.|.|.|.|.|.|.|.|.|.|.|.|.|.|
EMBOSS_001     51 GTCTTAGAGTTTCTANNNNNNNNNNNNNNNNNNNNNNNNNNNNNNNNNNN     100

EMBOSS_001     101 A      101
      .
EMBOSS_001     101 N      101
```

```
#-----
#-----
```

```
#####
# Program: stretcher
# Rundate: Thu 19 Mar 2015 22:46:20
# Commandline: stretcher
#   -auto
#   -stdout
#   -asequence emboss_stretcher-I20150319-224619-0372-4817525-pg.asequence
#   -bsequence emboss_stretcher-I20150319-224619-0372-4817525-pg.bsequence
#   -datafile EDNAFULL
#   -gapopen 16
#   -gapextend 4
#   -aformat3 pair
#   -snucleotide1
#   -snucleotide2
# Align_format: pair
# Report_file: stdout
#####
```

```
#=====
#
# Aligned_sequences: 2
# 1: EMBOSS_001
# 2: EMBOSS_001
# Matrix: EDNAFULL
# Gap_penalty: 16
# Extend_penalty: 4
#
# Length: 101
# Identity:      0/101 ( 0.0%)
# Similarity:   0/101 ( 0.0%)
# Gaps:         0/101 ( 0.0%)
# Score: -202
#
#
#=====
```

```
EMBOSS_001      1 ATTTTACTACATTTTCTCAGGTTGCAAAAATAGACACCGGGCACGTTCT      50
                  .....
EMBOSS_001      1 NNNNNNNNNNNNNNNNNNNNNNNNNNNNNNNNNNNNNNNNNNNNNNNNNNNNNNN      50

EMBOSS_001     51 GTCTTAGAGTTTCTAGCAAGGAGCGCCTTCAAGGCCAGGCAGGCTCTGT      100
                  .....
EMBOSS_001     51 NNNNNNNNNNNNNNNNNNNNNNNNNNNNNNNNNNNNNNNNNNNNNNNNNNNNNNN      100

EMBOSS_001     101 A      101
                   .
EMBOSS_001     101 N      101
```

```
#-----
#-----
```



```
#####
# Program: stretcher
# Rundate: Wed 29 Oct 2014 04:10:08
# Commandline: stretcher
# -auto
# -stdout
# -asequence emboss_stretcher-I20141029-041007-0214-53801550-pg.asequence
# -bsequence emboss_stretcher-I20141029-041007-0214-53801550-pg.bsequence
# -datafile EDNAFULL
# -gapopen 16
# -gapextend 4
# -aformat3 pair
# -snucleotide1
# -snucleotide2
# Align_format: pair
# Report_file: stdout
#####
```

```
#=====
#
# Aligned_sequences: 2
# 1: EMBOSS_001
# 2: EMBOSS_001
# Matrix: EDNAFULL
# Gap_penalty: 16
# Extend_penalty: 4
#
# Length: 101
# Identity:      100/101 (99.0%)
# Similarity:   100/101 (99.0%)
# Gaps:         0/101 ( 0.0%)
# Score: 496
#
#
#=====
```

```
EMBOSS_001      1  ATTTTACTACATTTTCTCAGGTTGCAAAAATAGACACCGGGCACGTTCT      50
      |
EMBOSS_001      1  ATTTTACTACATTTTCTCAGGTTGCAAAAATAGACACCGGGCACGTTCT      50

EMBOSS_001     51  GTCTTAGAGTTTCTAGCAAGGAGCGCCTTCAAGGCCAGGCAGGCTCTGT     100
      .|
EMBOSS_001     51  TTCTTAGAGTTTCTAGCAAGGAGCGCCTTCAAGGCCAGGCAGGCTCTGT     100

EMBOSS_001     101  A      101
      |
EMBOSS_001     101  A      101
```

```
#-----
#-----
```

```
#####
# Program: stretcher
# Rundate: Thu 23 Oct 2014 10:43:33
# Commandline: stretcher
# -auto
# -stdout
# -asequence emboss_stretcher-I20141023-104332-0665-8875996-es.asequence
# -bsequence emboss_stretcher-I20141023-104332-0665-8875996-es.bsequence
# -datafile EDNAFULL
# -gapopen 16
# -gapextend 4
# -aformat3 pair
# -snucleotide1
# -snucleotide2
# Align_format: pair
# Report_file: stdout
#####
```

```
#=====
#
# Aligned_sequences: 2
# 1: EMBOSS_001
# 2: EMBOSS_001
# Matrix: EDNAFULL
# Gap_penalty: 16
# Extend_penalty: 4
#
# Length: 101
# Identity:      100/101 (99.0%)
# Similarity:   100/101 (99.0%)
# Gaps:         0/101 ( 0.0%)
# Score: 496
#
#
#=====
```

```
EMBOSS_001      1 ATTTTACTACATTTTCTCAGGTTGCAAAAATAGACACCGGGCACGTTCT      50
                  |||
EMBOSS_001      1 ATTTTACTACATTTTCTCAGGTTGCAAAAATAGACACCGGGCACGTTCT      50

EMBOSS_001     51 GTCTTAGAGTTTCTAGCAAGGAGCGCCTTCAAGGCCAGGCAGGCTCTGT     100
                  .|||
EMBOSS_001     51 TTCTTAGAGTTTCTAGCAAGGAGCGCCTTCAAGGCCAGGCAGGCTCTGT     100

EMBOSS_001      101 A      101
                   |
EMBOSS_001      101 A      101
```

```
#-----
#-----
```



```
#####
# Program: stretcher
# Rundate: Sat 15 Nov 2014 05:06:09
# Commandline: stretcher
# -auto
# -stdout
# -asequence emboss_stretcher-I20141115-050608-0843-49755397-oy.asequence
# -bsequence emboss_stretcher-I20141115-050608-0843-49755397-oy.bsequence
# -datafile EDNAFULL
# -gapopen 16
# -gapextend 4
# -aformat3 pair
# -snucleotide1
# -snucleotide2
# Align_format: pair
# Report_file: stdout
#####
```

```
#=====
#
# Aligned_sequences: 2
# 1: EMBOSS_001
# 2: EMBOSS_001
# Matrix: EDNAFULL
# Gap_penalty: 16
# Extend_penalty: 4
#
# Length: 101
# Identity:      94/101 (93.1%)
# Similarity:   94/101 (93.1%)
# Gaps:         0/101 ( 0.0%)
# Score: 456
#
#
#=====
```

```
EMBOSS_001      1 ATTTTACTACATTTTCTCAGGTTGCAAAAATAGACACCGGGCACGTTCT      50
  |||...|
EMBOSS_001      1 ATTTTACTACATTTTCTCAGGTTGCAAAAATAGACACCGGGNNNNNNNT      50

EMBOSS_001     51 GTCTTAGAGTTTCTAGCAAGGAGCGCCTTCAAGGCCAGGCAGGCTCTGT     100
  |||...|
EMBOSS_001     51 GTCTTAGAGTTTCTAGCAAGGAGCGCCTTCAAGGCCAGGCAGGCTCTGT     100

EMBOSS_001     101 A      101
      |
EMBOSS_001     101 A      101
```

```
#-----
#-----
```

```
#####
# Program: stretcher
# Rundate: Tue 13 Jan 2015 07:28:49
# Commandline: stretcher
#   -auto
#   -stdout
#   -asequence emboss_stretcher-I20150113-072848-0436-90667373-es.asequence
#   -bsequence emboss_stretcher-I20150113-072848-0436-90667373-es.bsequence
#   -datafile EDNAFULL
#   -gapopen 16
#   -gapextend 4
#   -aformat3 pair
#   -snucleotide1
#   -snucleotide2
# Align_format: pair
# Report_file: stdout
#####
```

```
#=====
#
# Aligned_sequences: 2
# 1: EMBOSS_001
# 2: EMBOSS_001
# Matrix: EDNAFULL
# Gap_penalty: 16
# Extend_penalty: 4
#
# Length: 101
# Identity:      100/101 (99.0%)
# Similarity:    100/101 (99.0%)
# Gaps:          0/101 ( 0.0%)
# Score: 496
#
#
#=====
```

```
EMBOSS_001      1 ATTTTACTACATTTTCTCAGGTTGCAAAAATAGACACCGGGCAGGTTCT      50
                  |||
EMBOSS_001      1 ATTTTACTACATTTTCTCAGGTTGCAAAAATAGACACCGGGCAGGTTCT      50

EMBOSS_001     51 GTCTTAGAGTTTCTAGCAAGGAGCGCCTTCAAGGCCAGGCAGGCTCTGT     100
                  .|||
EMBOSS_001     51 TTCTTAGAGTTTCTAGCAAGGAGCGCCTTCAAGGCCAGGCAGGCTCTGT     100

EMBOSS_001      101 A      101
                   |
EMBOSS_001      101 A      101
```

```
#-----
#-----
```

```

1          1589  |||||||||||||||||||.|.|||||||||||||||||.|||||
1          1685  TGCAGTTTCTTAATAATATCAGGTGAAGATAAAATTTCCACGGAGAAAAC 1734
1          1639  TGCAGTTTCTTAATAACATCAGGTGAAGATAAAATTTTACGGAGAAAAC 1688
1          1735  GATCCTCCGGGATGCAGCTTCTTACTCTGAAAATTTCCCTGCCGACTCCT 1784
1          1689  GATCCGCCGGGATGCAGCCTTCTTACTCTGAAAATTTCCCTGCCGACTCCT 1738
1          1785  CACTCTCTGCGCTCCTCCTCGTTATCC-GGGACTCCTGCCTCTCTTCCC 1833
1          1739  CACTCTCTGCGCTCCTCCTCGTTACCCCGGGGAGTCTGCGTCTCTCCCC 1788
1          1834  CCTTCTCTTTTTTCTTTTTGGCAGAACCCGCCTGCAATATTCGTGTGCTG 1883
1          1789  CCTTCTCTTTTTTCTTTTTGGCAGAACTCTCCTGTAATATTCGTGCACTG 1838
1          1884  AGCTCGTAATTCCCCCTGCGATGCCAGCAACGCCAATTGATTGACTAGT 1933
1          1839  AGCTCATAATTCCCCCTGCGATGCCAGCAACGCCAATTGATTGACTAGT 1888
1          1934  TGTA AACACATTTTTTCCCTGGCAGATTTTGTGTTGTTAGGGTTTTTTA 1983
1          1889  TGTA AACACATTTTTTCCCTGGCAGATTTTGTGTTGTT--GGTTTTTTT 1936
1          1984  AATTTATTTATTTTCCAGGGAATGCGTGGCATTAAACCAACAGGACTGC 2033
1          1937  CTTTTTTTAAATTTTCCAGGGAATGCGTGGCATTAAAGCCAACAGAACTGC 1986
1          2034  AATTAATAGATTTGCGAGTTGCGCCGCGCGCCGCTCGCCCCAGCCTCC 2083
1          1987  AATTCATAGATTTGCGAGTTGCGCCCGCGCGCCGCTAGCCCCAGCCTCC 2036
1          2084  CGGCCCTCCGGGCTCGCTGCCTCCCCGCGCCCGGCGGCGTCCAGCGCCT 2133
1          2037  CGGCCCTCCGGCCTCGCTGCCTCCTGCGCCTGGAGGCGTCCAGCGCCTT 2086
1          2134  GCAAGCCCCGAGCAGCC-GCGGTCTGCGAGCTGAAGGAAGGTTGCGAGCT 2182
1          2087  GCAAGCACCGAGCAGCCCGCAGGTCTGCGAGCTGAAGGAAGGCGGCAGCT 2136
1          2183  GCGCCCTCCTTGCAAGCCGAGCCCGGCGTCTGGTTGTCCAGCAGCCA 2232
1          2137  GCGTCTCCTTGCAAGCCGAGCCCGGCGTCTGGTTGTCCAGCAGCCA 2186
1          2233  GGAGATCCCTACCTGTTAGTGAACAGTTAGGAGTCGACTGCTGGAAGAAT 2282
1          2187  GGAGCGCCCTACCTGTTAGTGAACAGCTGGGAGTCGACTGCTGGAAGGAT 2236
1          2283  TAATTAGGAACGTGCTGTGCTCTGGGCAGCGGAGCTCGGGTAGAGGCAT 2332
1          2237  TAATTAGGAACGTGCTGTGCTCCGGGCAGCGGAGCTCGGGTAGAGGCAT 2286
1          2333  CCAAACCTTTGCCGGCGGCGCTATTTTATTTTACTACATTTTCTCAGGT 2382
1          2287  CCAAATCTTTGCCGGCGGCGCTATTTTATTTTACTACATTTTCTCAGGT 2336
1          2383  TGCAAAAATAGACACCGGGCACGTTCTGTCCTAGAGTTTCTAGCAAGGA 2432
1          2337  TGCAAAAATAGACACCGGGCACGTTCTTCTGAGAGTTTCTAGCAAGGA 2386
1          2433  GCGCCTTCAAGGCCAGGCAGGCTCTGTAACAGGTTCCCTTTAAACAGCC 2482

```

```
#####
# Program: stretcher
# Rundate: Thu 23 Oct 2014 11:05:49
# Commandline: stretcher
# -auto
# -stdout
# -asequence emboss_stretcher-I20141023-110548-0289-11194942-es.asequence
# -bsequence emboss_stretcher-I20141023-110548-0289-11194942-es.bsequence
# -datafile EDNAFULL
# -gapopen 16
# -gapextend 4
# -aformat3 pair
# -snucleotide1
# -snucleotide2
# Align_format: pair
# Report_file: stdout
#####
```

```
#=====
#
# Aligned_sequences: 2
# 1: EMBOSS_001
# 2: EMBOSS_001
# Matrix: EDNAFULL
# Gap_penalty: 16
# Extend_penalty: 4
#
# Length: 101
# Identity:      96/101 (95.0%)
# Similarity:    96/101 (95.0%)
# Gaps:          0/101 ( 0.0%)
# Score: 460
#
#
#=====
```

```
EMBOSS_001      1  ATTTTACTACATTTTCTCAGGTTGCAAAAATAGACACCGGGCACGTTCT      50
   |||||||||||||||||||||||||||||||||||||||||||||||||||
EMBOSS_001      1  ATTTTACTACATTTTCTCAGGTTGCAAAAATAGACACCGGGCACGTTCT      50

EMBOSS_001     51  GTCTTAGAGTTTCTAGCAAGGAGCGCCTTCAAGGCCAGGCAGGCTCTGT     100
   .|||.|||||||||||||||||||||||||||||||||||||.|||||.
EMBOSS_001     51  TTCTGAGAGTTTCTAGCAAGGAGCGCCTTCAAGGCCGGGCAGGCTCTAC     100

EMBOSS_001     101 A      101
   |
EMBOSS_001     101 A      101
```

```
#-----
#-----
```

|      |                                                      |      |
|------|------------------------------------------------------|------|
| 2391 | AAATTGCAAAGCAATTAATAGATTTGCAAGTTGCGCCGCTTGCTGCTCGC   | 2440 |
| 2070 | TCG--CCCCAGCCTCCCGGCTCCGGGCTCGCTGCCCTCCCCGCGCCCGG    | 2117 |
| 2441 | TGGGGCTCCCGCCTCAGGGCCTCGGGGCTCGTTGCCCTCCCCACCCGAGC   | 2490 |
| 2118 | CGGCGTCCAGCGCCCTGCAAGCCCCGAGCAGCCGCGGGTCTGCAGCTGA    | 2167 |
| 2491 | CGGAATCCAGCGCTGTCCAGCCAGGAGCAGCCGCCGGCCCTGCAGATGA    | 2540 |
| 2168 | AGGAAGGTTGCAGCTGCGCCCTCCTTGCAAGCCGAGCCCGGCGTCCTGG    | 2217 |
| 2541 | AGC----CGGCTGCTGGGCCCGCCTTGAGAGCCGAGCCTGGCGCTCAGG    | 2586 |
| 2218 | TTGTCCC-AGCAGCCAGGAGATCCCTACCTGTTAGTGAACAGTTAGGAGT   | 2266 |
| 2587 | TCGTCCCAGCCGTCAGGAGCGCCCTACCTGTTAGTGAACAGTCGGGAGC    | 2636 |
| 2267 | CGACTGCTGGAAGAATTAATTAGGAACGTGCTGTGCTCTGGGCAGCGC-G   | 2315 |
| 2637 | CGGCTGCTGGAAGAATTAATTAGGGCATGCTGCTTCTGGGCAGCTCAG     | 2686 |
| 2316 | AGCTCGGGTAGAGGCATCCAAACCTTTGCCGG--CGGCGCTATTTTATTT   | 2363 |
| 2687 | AGCTTGGTTGAAACGTCCAAACCATTGCCGCGCCGAGTTACTTTATTT     | 2736 |
| 2364 | TTACTACATTTTCTCAGGTTGCAAAAA-----TAGACACCGGG-CAC      | 2404 |
| 2737 | GTA                                                  | 2786 |
| 2405 | GTTCTGCTTAGAGTTTTCTAGCAAGGAGCGCCTTCAAGGCCAGGCA-GG    | 2453 |
| 2787 | GTTCTTCCAGGGAGTTTTCTAGCAAGAAGTG-----AGCCCCGGGCCCGG   | 2830 |
| 2454 | CTCTGTAACAGGTTCCCCTTTAAACAGCCAGAGGTGAGACGGGGAAAAATG  | 2503 |
| 2831 | GCTAGAGCAGGTTTTCTGTTTAAGCCGTCAGAGGAGAGGTGTGAAGTGTG   | 2880 |
| 2504 | GTCCTGGCTGGGTTCTCGTTCATCTCCATCAGCAGTCCTTCACCCAGAGA   | 2553 |
| 2881 | GTC-TGGCTGGGTTCTCATCCATCTGTATTAGGAGTCTTTCATCCCAAGA   | 2929 |
| 2554 | GAGGGGCAGGGGTGCGCCCTAACTCAGATGAATGAGTCCCA-TGCCTGGAG  | 2602 |
| 2930 | G-GGGGCAGGGCG-GTCTTAACCTAGATGGATGAGGCCACTGCAGCCTG    | 2977 |
| 2603 | CCCTGGGGCCCTGGCTGGGGGCTGCTCCGAGCCTGAGGTGCTCAGGGCGC   | 2652 |
| 2978 | CAACAGAACACTGGCTGGGGGCTTACCCCTGAGCAAGGAGCTCTCTCAGC   | 3027 |
| 2653 | TCAGG--GCAGCAAG-TGTCCGCCACTTCGGTTTGTGTCATTTTTGG-CAGG | 2698 |
| 3028 | -CAGGTTGGACCAAAATGTCCCATCCTCCTGCCTGTCATCTGAGGGCAGG   | 3076 |
| 2699 | AGCGTTTTTCTGTCTGGGTGGAGAATGGAGTTTACGGAACACAGTTAA     | 2748 |
| 3077 | AATGTGCTG-TGTCTGTGTGG----CAGTGTTCATATAAACACAATTA     | 3121 |
| 2749 | CTCTTCAGGGGCCTTGCAGTACAGGAGGTGA-AGAGGATG---TCAGGG    | 2794 |
| 3122 | CTCCTCTGGGACTTTTGGTATATAATGGCTAACAGGGGCTTCCTTCAGGT   | 3171 |
| 2795 | GAGAGCCAGGTCCAGACTGGACATTTGGGGTGGTTTGGGAAATCAAATGC   | 2844 |
| 3172 | GAGAGTCAGGCC-----GCCATATGTGA-GGTTAGGGAATTTAAAGGC     | 3213 |



rs3824574

```
#####
# Program: stretcher
# Rundate: Wed 14 Jan 2015 06:36:43
# Commandline: stretcher
# -auto
# -stdout
# -asequence emboss_stretcher-I20150114-063642-0463-57816352-es.asequence
# -bsequence emboss_stretcher-I20150114-063642-0463-57816352-es.bsequence
# -datafile EDNAFULL
# -gapopen 16
# -gapextend 4
# -aformat3 pair
# -snucleotide1
# -snucleotide2
# Align_format: pair
# Report_file: stdout
#####
```

```
#=====
#
# Aligned_sequences: 2
# 1: EMBOSS_001
# 2: EMBOSS_001
# Matrix: EDNAFULL
# Gap_penalty: 16
# Extend_penalty: 4
#
# Length: 101
# Identity:      101/101 (100.0%)
# Similarity:   101/101 (100.0%)
# Gaps:         0/101 ( 0.0%)
# Score: 505
#
#
#=====
```

```
EMBOSS_001      1 ATGGACAACCTCTACACGCGGCTGGAGAGCGCCAAGGGCCTCAAGGAGTT      50
  |||
EMBOSS_001      1 ATGGACAACCTCTACACGCGGCTGGAGAGCGCCAAGGGCCTCAAGGAGTT      50

EMBOSS_001     51 CTTCACCCCTCACCGACCTGCGCATGCGGCTGCTGCGCCCGGCGTGGGCG      100
  |||
EMBOSS_001     51 CTTCACCCCTCACCGACCTGCGCATGCGGCTGCTGCGCCCGGCGTGGGCG      100

EMBOSS_001     101 G      101
      |
EMBOSS_001     101 G      101
```

```
#-----
#-----
```



```
#####
# Program: stretcher
# Rundate: Fri 20 Mar 2015 09:05:52
# Commandline: stretcher
#   -auto
#   -stdout
#   -asequence emboss_stretcher-I20150320-090551-0256-38253185-pg.asequence
#   -bsequence emboss_stretcher-I20150320-090551-0256-38253185-pg.bsequence
#   -datafile EDNAFULL
#   -gapopen 16
#   -gapextend 4
#   -aformat3 pair
#   -snucleotide1
#   -snucleotide2
# Align_format: pair
# Report_file: stdout
#####
```

```
#=====
#
# Aligned_sequences: 2
# 1: EMBOSS_001
# 2: EMBOSS_001
# Matrix: EDNAFULL
# Gap_penalty: 16
# Extend_penalty: 4
#
# Length: 101
# Identity:      76/101 (75.2%)
# Similarity:   76/101 (75.2%)
# Gaps:         0/101 ( 0.0%)
# Score: 330
#
#
#=====
```

```
EMBOSS_001      1 ATGGACAACCTCTACACGCGGCTGGAGAGCGCCAAGGGCCTCAAGGAGTT      50
  |||
EMBOSS_001      1 ATGGACAACCTCTACACGCGGCTGGAGAGCGCCAAGGGCCTCAAGGAGTT      50

EMBOSS_001     51 CTTCACCCCTCACCGACCTGCGCATGCGGCTGCTGCGCCCGGCGTGGGCG      100
  |||
EMBOSS_001     51 CTTCACCCCTCACCGACCTGCGCANNNNNNNNNNNNNNNNNNNNNNNNNNNNCG      100

EMBOSS_001     101 G      101
      |
EMBOSS_001     101 G      101
```

```
#-----
#-----
```

```
#####
# Program: stretcher
# Rundate: Fri 20 Mar 2015 09:09:09
# Commandline: stretcher
#   -auto
#   -stdout
#   -asequence emboss_stretcher-I20150320-090908-0826-82602335-oy.asequence
#   -bsequence emboss_stretcher-I20150320-090908-0826-82602335-oy.bsequence
#   -datafile EDNAFULL
#   -gapopen 16
#   -gapextend 4
#   -aformat3 pair
#   -snucleotide1
#   -snucleotide2
# Align_format: pair
# Report_file: stdout
#####
```

```
#=====
#
# Aligned_sequences: 2
# 1: EMBOSS_001
# 2: EMBOSS_001
# Matrix: EDNAFULL
# Gap_penalty: 16
# Extend_penalty: 4
#
# Length: 101
# Identity:      86/101 (85.1%)
# Similarity:    86/101 (85.1%)
# Gaps:          0/101 ( 0.0%)
# Score: 400
#
#
#=====
```

```
EMBOSS_001      1 ATGGACAACCTCTACACGCGGCTGGAGAGCGCCAAGGGCCTCAAGGAGTT      50
  |||
EMBOSS_001      1 ATGGACAACCTCTACACGCGGCTGGAGAGCGCCAAGGGCCTCAAGGAGTT      50

EMBOSS_001     51 CTTCACCCCTCACCGACCTGCGCATGCGGCTGCTGCGCCCGGCGTGGGCG      100
  |||
EMBOSS_001     51 CTTCACCCCTCACCGACCTGCGCATGCGGNNNNNNNNNNNNNNNNCTGGGCG      100

EMBOSS_001     101 G      101
      |
EMBOSS_001     101 G      101
```

```
#-----
#-----
```

```
#####
# Program: stretcher
# Rundate: Fri 20 Mar 2015 09:10:05
# Commandline: stretcher
#   -auto
#   -stdout
#   -asequence emboss_stretcher-I20150320-091004-0398-32864747-oy.asequence
#   -bsequence emboss_stretcher-I20150320-091004-0398-32864747-oy.bsequence
#   -datafile EDNAFULL
#   -gapopen 16
#   -gapextend 4
#   -aformat3 pair
#   -snucleotide1
#   -snucleotide2
# Align_format: pair
# Report_file: stdout
#####
```

```
#=====
#
# Aligned_sequences: 2
# 1: EMBOSS_001
# 2: EMBOSS_001
# Matrix: EDNAFULL
# Gap_penalty: 16
# Extend_penalty: 4
#
# Length: 101
# Identity:      85/101 (84.2%)
# Similarity:   85/101 (84.2%)
# Gaps:         0/101 ( 0.0%)
# Score: 393
#
#
#=====
```

```
EMBOSS_001      1 ATGGACAACCTCTACACGCGGCTGGAGAGCGCCAAGGGCCTCAAGGAGTT      50
  |||
EMBOSS_001      1 ATGGACAACCTCTACACGCGGCTGGAGAGCGCCAAGGGCCTCAAGGAGNN      50

EMBOSS_001     51 CTTCACCCCTCACCGACCTGCGCATGCGGCTGCTGCGCCCGGCGCTGGGGCG      100
  .....
EMBOSS_001     51 NNNNNNNNNNNNNNACCTGCGCATGCGGCTGCTGCGCCCGGCGCTGGGGCG      100

EMBOSS_001     101 G      101
      |
EMBOSS_001     101 G      101
```

```
#-----
#-----
```

```
#####
# Program: stretcher
# Rundate: Sat 3 Jan 2015 09:30:33
# Commandline: stretcher
# -auto
# -stdout
# -asequence emboss_stretcher-I20150103-093031-0773-78503093-pg.asequence
# -bsequence emboss_stretcher-I20150103-093031-0773-78503093-pg.bsequence
# -datafile EDNAFULL
# -gapopen 16
# -gapextend 4
# -aformat3 pair
# -snucleotide1
# -snucleotide2
# Align_format: pair
# Report_file: stdout
#####
```

```
#=====
#
# Aligned_sequences: 2
# 1: EMBOSS_001
# 2: EMBOSS_001
# Matrix: EDNAFULL
# Gap_penalty: 16
# Extend_penalty: 4
#
# Length: 101
# Identity: 101/101 (100.0%)
# Similarity: 101/101 (100.0%)
# Gaps: 0/101 ( 0.0%)
# Score: 505
#
#
#=====
```

```
EMBOSS_001      1 ATGGACAACCTCTACACGCGGCTGGAGAGCGCCAAGGGCCTCAAGGAGTT      50
  |||
EMBOSS_001      1 ATGGACAACCTCTACACGCGGCTGGAGAGCGCCAAGGGCCTCAAGGAGTT      50

EMBOSS_001     51 CTTCACCCCTCACCGACCTGCGCATGCGGCTGCTGCGCCCGGCGCTGGGGCG     100
  |||
EMBOSS_001     51 CTTCACCCCTCACCGACCTGCGCATGCGGCTGCTGCGCCCGGCGCTGGGGCG     100

EMBOSS_001      101 G      101
      |
EMBOSS_001      101 G      101
```

```
#-----
#-----
```

```
#####
# Program: stretcher
# Rundate: Fri 26 Dec 2014 08:20:40
# Commandline: stretcher
# -auto
# -stdout
# -asequence emboss_stretcher-I20141226-082039-0665-58309950-es.asequence
# -bsequence emboss_stretcher-I20141226-082039-0665-58309950-es.bsequence
# -datafile EDNAFULL
# -gapopen 16
# -gapextend 4
# -aformat3 pair
# -snucleotide1
# -snucleotide2
# Align_format: pair
# Report_file: stdout
#####
```

```
#=====
#
# Aligned_sequences: 2
# 1: EMBOSS_001
# 2: EMBOSS_001
# Matrix: EDNAFULL
# Gap_penalty: 16
# Extend_penalty: 4
#
# Length: 101
# Identity:      97/101 (96.0%)
# Similarity:   97/101 (96.0%)
# Gaps:         0/101 ( 0.0%)
# Score: 477
#
#
#=====
```

```
EMBOSS_001      1 ATGGACAACCTCTACACGCGGCTGGAGAGCGCCAAGGGCCTCAAGGAGTT      50
  |||
EMBOSS_001      1 ATGGACAACCTCTACACGCGGCTGGAGAGCGCCAAGGGCCNCAAGGAGTT      50
  |||

EMBOSS_001     51 CTTCACCCCTCACCGACCTGCGCATGCGGCTGCTGCGCCCGGCGCTGGGCG      100
  |||...|||
EMBOSS_001     51 CTTCANNNTCACCGACCTGCGCATGCGGCTGCTGCGCCCGGCGCTGGGCG      100

EMBOSS_001     101 G      101
      |
EMBOSS_001     101 G      101
```

```
#-----
#-----
```



```
#####
# Program: stretcher
# Rundate: Fri 20 Mar 2015 09:18:50
# Commandline: stretcher
#   -auto
#   -stdout
#   -asequence emboss_stretcher-I20150320-091849-0769-71403594-oy.asequence
#   -bsequence emboss_stretcher-I20150320-091849-0769-71403594-oy.bsequence
#   -datafile EDNAFULL
#   -gapopen 16
#   -gapextend 4
#   -aformat3 pair
#   -snucleotide1
#   -snucleotide2
# Align_format: pair
# Report_file: stdout
#####
```

```
#=====
#
# Aligned_sequences: 2
# 1: EMBOSS_001
# 2: EMBOSS_001
# Matrix: EDNAFULL
# Gap_penalty: 16
# Extend_penalty: 4
#
# Length: 101
# Identity:      14/101 (13.9%)
# Similarity:   14/101 (13.9%)
# Gaps:         0/101 ( 0.0%)
# Score: -104
#
#
#=====
```

```
EMBOSS_001      1 ATGGACAACCTCTACACGGCTGGAGAGCGCCAAGGGCCTCAAGGAGTT      50
                |||||||||||||.....
EMBOSS_001      1 ATGGACAACCTCTANNNNNNNNNNNNNNNNNNNNNNNNNNNNNNNNNNNNN      50

EMBOSS_001     51 CTTCACCTCACCGACCTGCGCATGCGGCTGCTGCGCCCGGCGTGGGCG      100
                .....
EMBOSS_001     51 NNNNNNNNNNNNNNNNNNNNNNNNNNNNNNNNNNNNNNNNNNNNNNNNNNN      100

EMBOSS_001     101 G      101
                .
EMBOSS_001     101 N      101
```

```
#-----
#-----
```





```
#####
# Program: stretcher
# Rundate: Wed 29 Oct 2014 04:18:53
# Commandline: stretcher
# -auto
# -stdout
# -asequence emboss_stretcher-I20141029-041852-0013-5792487-pg.asequence
# -bsequence emboss_stretcher-I20141029-041852-0013-5792487-pg.bsequence
# -datafile EDNAFULL
# -gapopen 16
# -gapextend 4
# -aformat3 pair
# -snucleotide1
# -snucleotide2
# Align_format: pair
# Report_file: stdout
#####
```

```
#=====
#
# Aligned_sequences: 2
# 1: EMBOSS_001
# 2: EMBOSS_001
# Matrix: EDNAFULL
# Gap_penalty: 16
# Extend_penalty: 4
#
# Length: 101
# Identity:      101/101 (100.0%)
# Similarity:    101/101 (100.0%)
# Gaps:          0/101 ( 0.0%)
# Score: 505
#
#
#=====
```

```
EMBOSS_001      1 ATGGACAACCTCTACACGCGGCTGGAGAGCGCCAAGGGCCTCAAGGAGTT      50
  |||
EMBOSS_001      1 ATGGACAACCTCTACACGCGGCTGGAGAGCGCCAAGGGCCTCAAGGAGTT      50

EMBOSS_001     51 C TTCACCCCTCACCGACCTGCGCATGCGGCTGCTGCGCCCGGCGCTGGGCG     100
  |||
EMBOSS_001     51 C TTCACCCCTCACCGACCTGCGCATGCGGCTGCTGCGCCCGGCGCTGGGCG     100

EMBOSS_001      101 G      101
      |
EMBOSS_001      101 G      101
```

```
#-----
#-----
```

```
#####
# Program: stretcher
# Rundate: Fri 24 Oct 2014 06:13:23
# Commandline: stretcher
#   -auto
#   -stdout
#   -asequence emboss_stretcher-I20141024-061322-0938-64397329-pg.asequence
#   -bsequence emboss_stretcher-I20141024-061322-0938-64397329-pg.bsequence
#   -datafile EDNAFULL
#   -gapopen 16
#   -gapextend 4
#   -aformat3 pair
#   -snucleotide1
#   -snucleotide2
# Align_format: pair
# Report_file: stdout
#####
```

```
#=====
#
# Aligned_sequences: 2
# 1: EMBOSS_001
# 2: EMBOSS_001
# Matrix: EDNAFULL
# Gap_penalty: 16
# Extend_penalty: 4
#
# Length: 101
# Identity:      101/101 (100.0%)
# Similarity:    101/101 (100.0%)
# Gaps:          0/101 ( 0.0%)
# Score: 505
#
#
#=====
```

```
EMBOSS_001      1 ATGGACAACCTCTACACGCGGCTGGAGAGCGCCAAGGGCCTCAAGGAGTT      50
  |||
EMBOSS_001      1 ATGGACAACCTCTACACGCGGCTGGAGAGCGCCAAGGGCCTCAAGGAGTT      50

EMBOSS_001     51 C TTCACCCCTCACCGACCTGCGCATGCGGCTGCTGCGCCCGGCGCTGGGCG     100
  |||
EMBOSS_001     51 C TTCACCCCTCACCGACCTGCGCATGCGGCTGCTGCGCCCGGCGCTGGGCG     100

EMBOSS_001      101 G      101
      |
EMBOSS_001      101 G      101
```

```
#-----
#-----
```

```
#####
# Program: stretcher
# Rundate: Sat 15 Nov 2014 05:10:08
# Commandline: stretcher
#   -auto
#   -stdout
#   -asequence emboss_stretcher-I20141115-051003-0169-23535321-oy.asequence
#   -bsequence emboss_stretcher-I20141115-051003-0169-23535321-oy.bsequence
#   -datafile EDNAFULL
#   -gapopen 16
#   -gapextend 4
#   -aformat3 pair
#   -snucleotide1
#   -snucleotide2
# Align_format: pair
# Report_file: stdout
#####
```

```
#=====
#
# Aligned_sequences: 2
# 1: EMBOSS_001
# 2: EMBOSS_001
# Matrix: EDNAFULL
# Gap_penalty: 16
# Extend_penalty: 4
#
# Length: 101
# Identity:      98/101 (97.0%)
# Similarity:   99/101 (98.0%)
# Gaps:         0/101 ( 0.0%)
# Score: 485
#
#
#=====
```

```
EMBOSS_001      1 ATGGACAACCTCTACACGGCTGGAGAGCGCCAAGGGCCTCAAGGAGTT      50
  |||
EMBOSS_001      1 ATGGACAACCTCTACACGGCTGGAGAGTGCCAAGGGCCTCAAGGAGTT      50

EMBOSS_001     51 CTTCACCCCTCACCGACCTGCGCATGCGGCTGCTGCGCCCGGCGCTGGGCG      100
  |||
EMBOSS_001     51 CTTCACCCCTCACCGACCTGCGCATNCRGCTGCTGCGCCCGGCGCTGGGCG      100

EMBOSS_001     101 G      101
      |
EMBOSS_001     101 G      101
```

```
#-----
#-----
```

```
#####
# Program: stretcher
# Rundate: Tue 13 Jan 2015 07:31:48
# Commandline: stretcher
# -auto
# -stdout
# -asequence emboss_stretcher-I20150113-073147-0851-40870416-oy.asequence
# -bsequence emboss_stretcher-I20150113-073147-0851-40870416-oy.bsequence
# -datafile EDNAFULL
# -gapopen 16
# -gapextend 4
# -aformat3 pair
# -snucleotide1
# -snucleotide2
# Align_format: pair
# Report_file: stdout
#####
```

```
#=====
#
# Aligned_sequences: 2
# 1: EMBOSS_001
# 2: EMBOSS_001
# Matrix: EDNAFULL
# Gap_penalty: 16
# Extend_penalty: 4
#
# Length: 101
# Identity:      99/101 (98.0%)
# Similarity:   99/101 (98.0%)
# Gaps:         0/101 ( 0.0%)
# Score: 487
#
#
#=====
```

```
EMBOSS_001      1 ATGGACAACCTCTACACGCGGCTGGAGAGCGCCAAGGGCCTCAAGGAGTT      50
  |||
EMBOSS_001      1 ATGGACAACCTCTACACGCGGCTGGAGAGCGCCAAGGGCCTCAAGGAGTT      50

EMBOSS_001     51 CTTCACCCCTCACCGACCTGCGCATGCGGCTGCTGCGCCCGGCGTGGGCG      100
  |||
EMBOSS_001     51 CTTCACCCCTCACTGACCTGCGCATGCGGCTGCTGCGCCCGGCGTTGGGCG      100

EMBOSS_001     101 G      101
      |
EMBOSS_001     101 G      101
```

```
#-----
#-----
```

```

      |||...|||
51  GGCCACCCGCCAGGCTCATGTTGACAAGGAGGAGGAGGGCCTGGTCA 100
      |||...|||
101 CCTACTGGCAGAGCATCACCTGGAGCCGCTACCCAGCCCCTGGAAGCC 150
      |||...|||
101 CCTACTGGCAGAGCATCACATGGAGCCGCTACCCAGCCCCTGGAAGCC 150
      |||...|||
151 AACATCACCCCTTTCGTGGAACAAGACCGTGGAGCTGACCGACGACGTGGT 200
      |||...|||
151 AACATCACCCCTTTCGTGGAACAAGACCGTGGAGCTGACCGACGACGTGGT 200
      |||...|||
201 GATGACCTTCGAGTACGGCCGGCCACGGTTCATGGTCTTGGAGAAGTCCC 250
      |||...|||
201 GATGACCTTCGAGTATGGCCGGCCACGGTTCATGGTCTTGGAGAAGTCCC 250
      |||...|||
251 TGGACAACGGGCGCACCTGGCAGCCCTACCAGTTCTACGCCGAGGACTGC 300
      |||...|||
251 TGGACAACGGGCGCACGTGGCAGCCCTACCAGTTCTACGCCGAGGACTGC 300
      |||...|||
301 ATGGAGGCCTTCGGTATGTCCGCCCGCCGGGCGCGACATGTCATCCTC 350
      |||...|||
301 ATGGAGGCCTTCGGCATGTCCGCCCGCCGGGCGCGACATGTCATCCTC 350
      |||...|||
351 CAGCGGCACCCGCTGCTCTGCACCGAGGAGTACTCGCGCTGGGCAGGCT 400
      |||...|||
351 CAGCGCCACCCGCTGCTCTGCACCGAGGAGTACTCACGCTGGGCAGGCT 400
      |||...|||
401 CCAAGAAGGAGAAGCACGTGCGCTTCGAGGTGCGGGACCGCTTCGCCATC 450
      |||...|||
401 CCAAGAAGGAGAAACACGTGCGCTTCGAGGTGCGGGACCGCTTCGCCATC 450
      |||...|||
451 TTTGCCGGCCCCGACCTGCGCAACATGGACAACCTCTACACGCGGCTGGA 500
      |||...|||
451 TTTGCCGGCCCCGACCTGCGCAACATGGACAACCTCTACACGCGGCTGGA 500
      |||...|||
501 GAGCGCCAAGGGCCTCAAGGAGTTCCTCACCCCTACCGACCTGCGCATGC 550
      |||...|||
501 GAGCGCCAAGGGCCTCAAGGAGTTCCTCACCCCTACCGACCTGCGCATGC 550
      |||...|||
551 GGCTGCTGCGCCCCGCGCTGGGCGGCACCTATGTGCAGCGGGAGAACCTC 600
      |||...|||
551 GGCTGCTGCGCCCCGCGCTGGGCGGCACCTATGTGCAGCGGGAGAACCTC 600
      |||...|||
601 TACAAGTACTTCTACGCCATCTCCAACATCGAGGTCATCGGCAG 644
      |||...|||
601 TACAAGTACTTCTATGCCATCTCCAACATTGAGGTCATTGGCAG 644

```

```

#-----
#-----

```

```
#####
# Program: stretcher
# Rundate: Wed 25 Mar 2015 10:46:45
# Commandline: stretcher
#   -auto
#   -stdout
#   -asequence emboss_stretcher-I20150325-104644-0505-23882772-oy.asequence
#   -bsequence emboss_stretcher-I20150325-104644-0505-23882772-oy.bsequence
#   -datafile EDNAFULL
#   -gapopen 16
#   -gapextend 4
#   -aformat3 pair
#   -snucleotide1
#   -snucleotide2
# Align_format: pair
# Report_file: stdout
#####
```

```
#=====
#
# Aligned_sequences: 2
# 1: EMBOSS_001
# 2: EMBOSS_001
# Matrix: EDNAFULL
# Gap_penalty: 16
# Extend_penalty: 4
#
# Length: 101
# Identity:      100/101 (99.0%)
# Similarity:    100/101 (99.0%)
# Gaps:          0/101 ( 0.0%)
# Score: 496
#
#
#=====
```

```
EMBOSS_001      1 ATGGACAACCTCTACACGCGGCTGGAGAGCGCCAAGGGCCTCAAGGAGTT      50
  |||
EMBOSS_001      1 ATGGACAACCTCTACACGCGGCTGGAGAGCGCCAAGGGCCTCAAGGAGTT      50
  |||
EMBOSS_001     51 CTTCACCCCTCACCGACCTGCGCATGCGGCTGCTGCGCCCGCGCTGGGCG      100
  |||
EMBOSS_001     51 CTTCACCCCTCACCGACCTGCGCATGCGGCTGCTGCGCCCGCGCTGGGCG      100
  |||
EMBOSS_001     101 G          101
      |
EMBOSS_001     101 G          101
```

```
#-----
#-----
```







rs2149171

```
#####
# Program: stretcher
# Rundate: Wed 14 Jan 2015 06:39:50
# Commandline: stretcher
#   -auto
#   -stdout
#   -asequence emboss_stretcher-I20150114-063949-0867-45766045-es.asequence
#   -bsequence emboss_stretcher-I20150114-063949-0867-45766045-es.bsequence
#   -datafile EDNAFULL
#   -gapopen 16
#   -gapextend 4
#   -aformat3 pair
#   -snucleotide1
#   -snucleotide2
# Align_format: pair
# Report_file: stdout
#####
```

```
#=====
#
# Aligned_sequences: 2
# 1: EMBOSS_001
# 2: EMBOSS_001
# Matrix: EDNAFULL
# Gap_penalty: 16
# Extend_penalty: 4
#
# Length: 101
# Identity:      100/101 (99.0%)
# Similarity:   101/101 (100.0%)
# Gaps:         0/101 ( 0.0%)
# Score: 501
#
#
#=====
```

```
EMBOSS_001      1 CTGACATCTCTGCCCTCTCGGTGTCTCCCCAGGTGCAAGTGCAACCTGCA      50
  |||
EMBOSS_001      1 CTGACATCTCTGCCCTCTCGGTGTCTCCCCAGGTGCAAGTGCAACCTGCA      50

EMBOSS_001     51 CGCCAACCTGTGCTCCATGCGCGAGGGCAGCCTGCAGTGCGAGTGCGAGC     100
  : |||
EMBOSS_001     51 YGCCAACCTGTGCTCCATGCGCGAGGGCAGCCTGCAGTGCGAGTGCGAGC     100

EMBOSS_001     101 A      101
      |
EMBOSS_001     101 A      101
```

```
#-----
#-----
```

```
#####
# Program: stretcher
# Rundate: Wed 25 Mar 2015 07:21:55
# Commandline: stretcher
#   -auto
#   -stdout
#   -asequence emboss_stretcher-I20150325-072149-0454-99236667-es.asequence
#   -bsequence emboss_stretcher-I20150325-072149-0454-99236667-es.bsequence
#   -datafile EDNAFULL
#   -gapopen 16
#   -gapextend 4
#   -aformat3 pair
#   -snucleotide1
#   -snucleotide2
# Align_format: pair
# Report_file: stdout
#####
```

```
#=====
#
# Aligned_sequences: 2
# 1: EMBOSS_001
# 2: EMBOSS_001
# Matrix: EDNAFULL
# Gap_penalty: 16
# Extend_penalty: 4
#
# Length: 101
# Identity:      90/101 (89.1%)
# Similarity:    90/101 (89.1%)
# Gaps:          0/101 ( 0.0%)
# Score: 428
#
#
#=====
```

```
EMBOSS_001      1 CTGACATCTCTGCCCTCTCGGTGTCTCCCCAGGTGCAAGTGCAACCTGCA      50
  |||.....
EMBOSS_001      1 CTGACATCTCTGCCCTCTCGGTGTCTCCCCAGGTGCAAGTGCAACNNNN      50

EMBOSS_001     51 CGCCAACCTGTGCTCCATGCGCGAGGGCAGCCTGCAGTGCGAGTGCGAGC     100
  .....|.....
EMBOSS_001     51 NNNNNACCTGTGCTCCATGCGCGAGGGCAGCCTGCAGTGCGAGTGCGAGN     100

EMBOSS_001     101 A      101
      .
EMBOSS_001     101 N      101
```

```
#-----
#-----
```

```
#####
# Program: stretcher
# Rundate: Wed 25 Mar 2015 07:23:18
# Commandline: stretcher
#   -auto
#   -stdout
#   -asequence emboss_stretcher-I20150325-072317-0001-77930394-pg.asequence
#   -bsequence emboss_stretcher-I20150325-072317-0001-77930394-pg.bsequence
#   -datafile EDNAFULL
#   -gapopen 16
#   -gapextend 4
#   -aformat3 pair
#   -snucleotide1
#   -snucleotide2
# Align_format: pair
# Report_file: stdout
#####
```

```
#=====
#
# Aligned_sequences: 2
# 1: EMBOSS_001
# 2: EMBOSS_001
# Matrix: EDNAFULL
# Gap_penalty: 16
# Extend_penalty: 4
#
# Length: 101
# Identity:      76/101 (75.2%)
# Similarity:   76/101 (75.2%)
# Gaps:         0/101 ( 0.0%)
# Score: 328
#
#
#=====
```

```
EMBOSS_001      1 CTGACATCTCTGCCCTCTCGGTGTCTCCCCAGGTGCAAGTGCAACCTGCA      50
  |||
EMBOSS_001      1 CTGACATCTCTGCCCTCTCGGTGTCTCCCCAGGTGCAAGTGCAACCTGCA      50

EMBOSS_001     51 CGCCAACCTGTGCTCCATGCGCGAGGGCAGCCTGCAGTGCGAGTGCGAGC     100
  .|||
EMBOSS_001     51 TGCCAACCTGTGCTCCATGCGCGAGGGNNNNNNNNNNNNNNNNNNNNNNNNNN     100

EMBOSS_001     101 A      101
      .
EMBOSS_001     101 N      101
```

```
#-----
#-----
```



```
#####
# Program: stretcher
# Rundate: Sat 3 Jan 2015 09:32:46
# Commandline: stretcher
# -auto
# -stdout
# -asequence emboss_stretcher-I20150103-093245-0206-80445990-pg.asequence
# -bsequence emboss_stretcher-I20150103-093245-0206-80445990-pg.bsequence
# -datafile EDNAFULL
# -gapopen 16
# -gapextend 4
# -aformat3 pair
# -snucleotide1
# -snucleotide2
# Align_format: pair
# Report_file: stdout
#####
```

```
#=====
#
# Aligned_sequences: 2
# 1: EMBOSS_001
# 2: EMBOSS_001
# Matrix: EDNAFULL
# Gap_penalty: 16
# Extend_penalty: 4
#
# Length: 101
# Identity: 101/101 (100.0%)
# Similarity: 101/101 (100.0%)
# Gaps: 0/101 ( 0.0%)
# Score: 505
#
#
#=====
```

```
EMBOSS_001      1 CTGACATCTCTGCCCTCTCGGTGTCTCCCCAGGTGCAAGTGCAACCTGCA      50
  |||
EMBOSS_001      1 CTGACATCTCTGCCCTCTCGGTGTCTCCCCAGGTGCAAGTGCAACCTGCA      50

EMBOSS_001     51 CGCCAACCTGTGCTCCATGCGCGAGGGCAGCCTGCAGTGCAGTGCAGTGCAGC      100
  |||
EMBOSS_001     51 CGCCAACCTGTGCTCCATGCGCGAGGGCAGCCTGCAGTGCAGTGCAGTGCAGC      100

EMBOSS_001     101 A      101
      |
EMBOSS_001     101 A      101
```

```
#-----
#-----
```

```
#####
# Program: stretcher
# Rundate: Fri 26 Dec 2014 08:34:20
# Commandline: stretcher
#   -auto
#   -stdout
#   -asequence emboss_stretcher-I20141226-083419-0706-28313104-pg.asequence
#   -bsequence emboss_stretcher-I20141226-083419-0706-28313104-pg.bsequence
#   -datafile EDNAFULL
#   -gapopen 16
#   -gapextend 4
#   -aformat3 pair
#   -snucleotide1
#   -snucleotide2
# Align_format: pair
# Report_file: stdout
#####
```

```
#=====
#
# Aligned_sequences: 2
# 1: EMBOSS_001
# 2: EMBOSS_001
# Matrix: EDNAFULL
# Gap_penalty: 16
# Extend_penalty: 4
#
# Length: 101
# Identity:      100/101 (99.0%)
# Similarity:    100/101 (99.0%)
# Gaps:          0/101 ( 0.0%)
# Score: 498
#
#
#=====
```

```
EMBOSS_001      1 CTGACATCTCTGCCCTCTCGGTGTCTCCCCAGGTGCAAGTGCAACCTGCA      50
  |||
EMBOSS_001      1 CTGACATCTCTGCCCTCTCGGTGTCTCCCCAGGTGCAAGTGCAACCTGCA      50

EMBOSS_001     51 CGCCAACCTGTGCTCCATGCGCGAGGGCAGCCTGCAGTGCAGTGCAGTGCAGC      100
  |||
EMBOSS_001     51 CGCCAACCTGTGCTCCATGCGCGAGGGCAGCCTGCAGTGCAGTGCAGTGCAGC      100

EMBOSS_001     101 A      101
      .
EMBOSS_001     101 N      101
```

```
#-----
#-----
```

```
#####
# Program: stretcher
# Rundate: Sun 4 Jan 2015 08:02:49
# Commandline: stretcher
# -auto
# -stdout
# -asequence emboss_stretcher-I20150104-080248-0571-20592358-pg.asequence
# -bsequence emboss_stretcher-I20150104-080248-0571-20592358-pg.bsequence
# -datafile EDNAFULL
# -gapopen 16
# -gapextend 4
# -aformat3 pair
# -snucleotide1
# -snucleotide2
# Align_format: pair
# Report_file: stdout
#####
```

```
#=====
#
# Aligned_sequences: 2
# 1: EMBOSS_001
# 2: EMBOSS_001
# Matrix: EDNAFULL
# Gap_penalty: 16
# Extend_penalty: 4
#
# Length: 101
# Identity:      95/101 (94.1%)
# Similarity:    95/101 (94.1%)
# Gaps:          0/101 ( 0.0%)
# Score: 463
#
#
#=====
```

```
EMBOSS_001      1 CTGACATCTCTGCCCTCTCGGTGTCTCCCCAGGTGCAAGTGCAACCTGCA      50
  |||.....
EMBOSS_001      1 CTGACATCTCTGCCCTCTCGGTGTCTCCCCAGGTGCAAGTGCAANNNNNN      50

EMBOSS_001     51 CGCCAACCTGTGCTCCATGCGCGAGGGCAGCCTGCAGTGCAGTGCAGTGCAGC      100
  |||.....
EMBOSS_001     51 CGCCAACCTGTGCTCCATGCGCGAGGGCAGCCTGCAGTGCAGTGCAGTGCAGC      100

EMBOSS_001     101 A      101
      |
EMBOSS_001     101 A      101
```

```
#-----
#-----
```



```
#####
# Program: stretcher
# Rundate: Wed 25 Mar 2015 07:30:08
# Commandline: stretcher
# -auto
# -stdout
# -asequence emboss_stretcher-I20150325-073007-0135-99140164-pg.asequence
# -bsequence emboss_stretcher-I20150325-073007-0135-99140164-pg.bsequence
# -datafile EDNAFULL
# -gapopen 16
# -gapextend 4
# -aformat3 pair
# -snucleotide1
# -snucleotide2
# Align_format: pair
# Report_file: stdout
#####
```

```
#=====
#
# Aligned_sequences: 2
# 1: EMBOSS_001
# 2: 135102204-135102304_101bp_rs2149171
# Matrix: EDNAFULL
# Gap_penalty: 16
# Extend_penalty: 4
#
# Length: 101
# Identity:      0/101 ( 0.0%)
# Similarity:   0/101 ( 0.0%)
# Gaps:         0/101 ( 0.0%)
# Score: -202
#
#
#=====
```

|               |     |                                                              |     |
|---------------|-----|--------------------------------------------------------------|-----|
| EMBOSS_001    | 1   | CTGACATCTCTGCCCTCTCGGTGTCTCCCCAGGTGCAAGTGCAACCTGCA           | 50  |
|               |     | .....                                                        |     |
| 135102204-135 | 1   | NNNNNNNNNNNNNNNNNNNNNNNNNNNNNNNNNNNNNNNNNNNNNNNNNNNNNNNNNNNN | 50  |
| EMBOSS_001    | 51  | CGCCAACCTGTGCTCCATGCGCGAGGGCAGCCTGCAGTGCGAGTGCGAGC           | 100 |
|               |     | .....                                                        |     |
| 135102204-135 | 51  | NNNNNNNNNNNNNNNNNNNNNNNNNNNNNNNNNNNNNNNNNNNNNNNNNNNNNNNNNNNN | 100 |
| EMBOSS_001    | 101 | A                                                            | 101 |
|               |     | .                                                            |     |
| 135102204-135 | 101 | N                                                            | 101 |

```
#-----
#-----
```

```
#####
# Program: stretcher
# Rundate: Fri 24 Oct 2014 09:53:29
# Commandline: stretcher
#   -auto
#   -stdout
#   -asequence emboss_stretcher-I20141024-095328-0831-57883541-es.asequence
#   -bsequence emboss_stretcher-I20141024-095328-0831-57883541-es.bsequence
#   -datafile EBLOSUM62
#   -gapopen 12
#   -gapextend 2
#   -aformat3 pair
#   -sprotein1
#   -sprotein2
# Align_format: pair
# Report_file: stdout
#####
```

```
#=====
#
# Aligned_sequences: 2
# 1: EMBOSS_001
# 2: EMBOSS_001
# Matrix: EBLOSUM62
# Gap_penalty: 12
# Extend_penalty: 2
#
# Length: 101
# Identity:      98/101 (97.0%)
# Similarity:    98/101 (97.0%)
# Gaps:          0/101 ( 0.0%)
# Score: 643
#
#
#=====
```

```
EMBOSS_001      1 CTGACATCTCTGCCCTCTCGGTGTCTCCCCAGGTGCAAGTGCAACCTGCA      50
  |||
EMBOSS_001      1 CTGACATCTCTGCCCTCTCGGTGTCTCCCCAGGTGCAAGTGCAACCTGCA      50

EMBOSS_001     51 CGCCAACCTGTGCTCCATGCGCGAGGGCAGCCTGCAGTGCGAGTGCGAGC     100
  |||
EMBOSS_001     51 CGCCAACCTGTGCTCCATGCGCGNNGCAGCCTGCAGTGCGAGTGCGAGC     100

EMBOSS_001     101 A      101
      |
EMBOSS_001     101 A      101
```

```
#-----
#-----
```

```
#####
# Program: stretcher
# Rundate: Wed 29 Oct 2014 04:28:46
# Commandline: stretcher
# -auto
# -stdout
# -asequence emboss_stretcher-I20141029-042845-0705-35192998-pg.asequence
# -bsequence emboss_stretcher-I20141029-042845-0705-35192998-pg.bsequence
# -datafile EDNAFULL
# -gapopen 16
# -gapextend 4
# -aformat3 pair
# -snucleotide1
# -snucleotide2
# Align_format: pair
# Report_file: stdout
#####
```

```
#=====
#
# Aligned_sequences: 2
# 1: EMBOSS_001
# 2: EMBOSS_001
# Matrix: EDNAFULL
# Gap_penalty: 16
# Extend_penalty: 4
#
# Length: 101
# Identity:      100/101 (99.0%)
# Similarity:   100/101 (99.0%)
# Gaps:         0/101 ( 0.0%)
# Score: 496
#
#
#=====
```

```
EMBOSS_001      1 CTGACATCTCTGCCCTCTCGGTGTCTCCCCAGGTGCAAGTGCAACCTGCA      50
  |||
EMBOSS_001      1 CTGACATCTCTGCCCTCTCGGTGTCTCCCCAGGTGCAAGTGCAACCTGCA      50

EMBOSS_001     51 CGCCAACCTGTGCTCCATGCGCGAGGGCAGCCTGCAGTGCGAGTGCGAGC     100
  |||
EMBOSS_001     51 CGCCAACCTGTGCTCCATGCGCGAGGGCAGCCTGCAGTGCGAGTGCGAGC     100

EMBOSS_001     101 A      101
      |
EMBOSS_001     101 A      101
```

```
#-----
#-----
```

```
#####
# Program: stretcher
# Rundate: Fri 24 Oct 2014 09:43:45
# Commandline: stretcher
# -auto
# -stdout
# -asequence emboss_stretcher-I20141024-094344-0344-96567581-pg.asequence
# -bsequence emboss_stretcher-I20141024-094344-0344-96567581-pg.bsequence
# -datafile EBLOSUM62
# -gapopen 12
# -gapextend 2
# -aformat3 pair
# -sprotein1
# -sprotein2
# Align_format: pair
# Report_file: stdout
#####
```

```
#=====
#
# Aligned_sequences: 2
# 1: EMBOSS_001
# 2: EMBOSS_001
# Matrix: EBLOSUM62
# Gap_penalty: 12
# Extend_penalty: 2
#
# Length: 101
# Identity:      101/101 (100.0%)
# Similarity:   101/101 (100.0%)
# Gaps:         0/101 ( 0.0%)
# Score: 661
#
#
#=====
```

```
EMBOSS_001      1 CTGACATCTCTGCCCTCTCGGTGTCTCCCCAGGTGCAAGTGCAACCTGCA      50
  |||
EMBOSS_001      1 CTGACATCTCTGCCCTCTCGGTGTCTCCCCAGGTGCAAGTGCAACCTGCA      50

EMBOSS_001     51 CGCCAACCTGTGCTCCATGCGCGAGGGCAGCCTGCAGTGCGAGTGCGAGC     100
  |||
EMBOSS_001     51 CGCCAACCTGTGCTCCATGCGCGAGGGCAGCCTGCAGTGCGAGTGCGAGC     100

EMBOSS_001      101 A      101
      |
EMBOSS_001      101 A      101
```

```
#-----
#-----
```

```
#####
# Program: stretcher
# Rundate: Sat 15 Nov 2014 05:21:47
# Commandline: stretcher
# -auto
# -stdout
# -asequence emboss_stretcher-I20141115-052146-0249-92205062-pg.asequence
# -bsequence emboss_stretcher-I20141115-052146-0249-92205062-pg.bsequence
# -datafile EDNAFULL
# -gapopen 16
# -gapextend 4
# -aformat3 pair
# -snucleotide1
# -snucleotide2
# Align_format: pair
# Report_file: stdout
#####
```

```
#=====
#
# Aligned_sequences: 2
# 1: EMBOSS_001
# 2: EMBOSS_001
# Matrix: EDNAFULL
# Gap_penalty: 16
# Extend_penalty: 4
#
# Length: 101
# Identity:      48/101 (47.5%)
# Similarity:    48/101 (47.5%)
# Gaps:          0/101 ( 0.0%)
# Score: 134
#
#
#=====
```

```
EMBOSS_001      1 CTGACATCTCTGCCCTCTCGGTGTCTCCCCAGGTGCAAGTGCAACCTGCA      50
                  .....| | | | | | | | | | | | | | | | | | | | | | | | | | | | | |
EMBOSS_001      1 NNNNNNNNNNNNNNNNNNNNNNNNNNNNNCTCCCCAGGTGCAAGTGCAACCTGCA      50

EMBOSS_001     51 CGCCAACCTGTGCTCCATGCGCGAGGGCAGCCTGCAGTGCGAGTGCGAGC      100
                  || | | | | | | | | .....| | | | | | | | | | | | | | | | | | |
EMBOSS_001     51 CGCCAACCTNNNNNNNNNNNNNNNNNNNNNNNNNNNNNNNNNNNNNNNGCGAGTGCGAGC      100

EMBOSS_001     101 A      101
                   |
EMBOSS_001     101 A      101
```

```
#-----
#-----
```

```
#####
# Program: stretcher
# Rundate: Tue 13 Jan 2015 08:03:18
# Commandline: stretcher
#   -auto
#   -stdout
#   -asequence emboss_stretcher-I20150113-080316-0967-16633028-pg.asequence
#   -bsequence emboss_stretcher-I20150113-080316-0967-16633028-pg.bsequence
#   -datafile EDNAFULL
#   -gapopen 16
#   -gapextend 4
#   -aformat3 pair
#   -snucleotide1
#   -snucleotide2
# Align_format: pair
# Report_file: stdout
#####
```

```
#=====
#
# Aligned_sequences: 2
# 1: EMBOSS_001
# 2: EMBOSS_001
# Matrix: EDNAFULL
# Gap_penalty: 16
# Extend_penalty: 4
#
# Length: 101
# Identity:      101/101 (100.0%)
# Similarity:   101/101 (100.0%)
# Gaps:         0/101 ( 0.0%)
# Score: 505
#
#
#=====
```

```
EMBOSS_001      1 CTGACATCTCTGCCCTCTCGGTGTCTCCCCAGGTGCAAGTGCAACCTGCA      50
  |||
EMBOSS_001      1 CTGACATCTCTGCCCTCTCGGTGTCTCCCCAGGTGCAAGTGCAACCTGCA      50

EMBOSS_001     51 CGCCAACCTGTGCTCCATGCGCGAGGGCAGCCTGCAGTGCAGTGCGAGC      100
  |||
EMBOSS_001     51 CGCCAACCTGTGCTCCATGCGCGAGGGCAGCCTGCAGTGCAGTGCGAGC      100

EMBOSS_001     101 A      101
      |
EMBOSS_001     101 A      101
```

```
#-----
#-----
```

```

EMBOSS_001 27869 ----CCATCAACCCACATCAG----- 27885
      |.|.|.|.|.|.|.|.|.|
EMBOSS_001 28880 GTTGCAATAAGCCGAGATCAGCCATTGCACTCCGGCCCGGATGACAGTG 28929
EMBOSS_001 27886 -----TCAAA-----GG-----CTAGGGTG 27900
      |||||      ||      |||||
EMBOSS_001 28930 TGAGACTGTGTCTCAAAAAAAGTTGGGTGAGGGGTGTGGTCTTAGGGTG 28979
EMBOSS_001 27901 ATCAGAAGCTGCATTACTAAGAATCTAGCATCTGGGACAAGGCAGTATCA 27950
      |||.|||||
EMBOSS_001 28980 ATCTGAAGCTGCATTACTAAGAATCTAACATCTAGGACAAGGGAGTATCA 29029
EMBOSS_001 27951 TCACTCTCCCCAACTGAGATGTGAGGAATCCTTGAAACCAGCATCAGAGC 28000
      |||||
EMBOSS_001 29030 TCACTCTCCCCAACTGAGATGTGGGGAATCACTGAAACCAGCATCAGAGT 29079
EMBOSS_001 28001 AGAGAGGAGAGCCGCGCAGTGACTGCAGGTGTGGCCTTTGGAACAC--GG 28048
      .|||||
EMBOSS_001 29080 GGAGAG---AGCCACACAGTGAGTGTAGGGGCAGCCTTCGGAACACACGG 29126
EMBOSS_001 28049 CGTTGATCTCTCTGCAGGAAGGGGAATCAAGGAGTTTCTGGCCTAAAGGT 28098
      |||||
EMBOSS_001 29127 CGTTGATCTCTCTGCAGGAGGGGGAATCAAGGATTTTCTGGCCTAAAGCT 29176
EMBOSS_001 28099 TGGGCTGGTGGCCTCCAGGGTTTCTTCCTGGGCAGCCCAACACCTCCTG 28148
      |||||
EMBOSS_001 29177 TGGGCTGGTGGCCTCCAGGGTTTCTTCCTGGGCATCCCAACACC----- 29220
EMBOSS_001 28149 GGCCCTCCTGGGAGGCGCTCCTTCCCCAGAGGCCAGGCCAGGCTGCCC 28198
      |||||
EMBOSS_001 29221 -----TCCTGGGAGGCACTCCTTCCCCAAAGTCCAGGCCAGGCTGCCC 29264
      int (3-4)/exon 4
EMBOSS_001 28199 ACAAGCTCTCTGACATCTCTGCCCTCTCGGTGTCTCCCCAGGTGCAAGTG 28248
      |..|||||
EMBOSS_001 29265 ATGAGCTCTCTGACATCTCTGCCCTTGTGCTGTCTCCCCAGGTGCAAGTG 29314
EMBOSS_001 28249 CAACCTGCACGCCAACCTGTGCTCCATGCGCGAGGGCAGCCTGCAGTGCG 28298
      |||||
EMBOSS_001 29315 CAACCTGCACGCCAACCTGTGCTCTGTCCGGGAGGGCAGCCTGCAGTGTG 29364
EMBOSS_001 28299 AGTGCAGACACAACACCACCGCCCCGACTGCGGCAAGTGCAAGAAGAAT 28348
      |||||.|||||
EMBOSS_001 29365 AGTGTGAGCACAACACCACCGCCCTGACTGCGGCAAGTGCAAGAAGAAC 29414
EMBOSS_001 28349 TTCCGCACCCGGTCTTGGCGGGCCGGCTCCTACCTGCCGCTGCCCCATGG 28398
      |||||
EMBOSS_001 29415 TTCCGCACCCGGTCTTGGCGGGCCGGCTCCTACCTGCCGCTGCCCCACGG 29464
EMBOSS_001 28399 CTCTCCCAACGCCT 28412
      |||||
EMBOSS_001 29465 CTCTCCCAACGCCT 29478
    
```

```

#-----
#-----
    
```

```
#####
# Program: stretcher
# Rundate: Wed 25 Mar 2015 07:57:53
# Commandline: stretcher
#   -auto
#   -stdout
#   -asequence emboss_stretcher-I20150325-075752-0265-13064726-pg.asequence
#   -bsequence emboss_stretcher-I20150325-075752-0265-13064726-pg.bsequence
#   -datafile EDNAFULL
#   -gapopen 16
#   -gapextend 4
#   -aformat3 pair
#   -snucleotide1
#   -snucleotide2
# Align_format: pair
# Report_file: stdout
#####

#=====
#
# Aligned_sequences: 2
# 1: EMBOSS_001
# 2: EMBOSS_001
# Matrix: EDNAFULL
# Gap_penalty: 16
# Extend_penalty: 4
#
# Length: 101
# Identity:      92/101 (91.1%)
# Similarity:   92/101 (91.1%)
# Gaps:         0/101 ( 0.0%)
# Score: 424
#
#
#=====
int (3-4)/exon 4
EMBOSS_001      1 CTGACATCTCTGCCCTCTCGGTGCTCCCCAGGTGCAAGTGCAACCTGCA      50
  |||
EMBOSS_001      1 CTGACATCTCTGCCCCCTTGCTGTCTCCCCAGGTGCAAGTGCAACCTGCA      50
  |||
EMBOSS_001     51 CGCCAACCTGTGCTCCATGCGCGAGGGCAGCCTGCAGTGCAGTGCGAGC      100
  |||
EMBOSS_001     51 CGCCAACCTGTGCTCTGTCCGGGAGGGCAGCCTGCAGTGTGAGTGTGAGC      100
  |||
EMBOSS_001     101 A      101
      |
EMBOSS_001     101 A      101

#-----
#-----
```





```
#####
# Program: stretcher
# Rundate: Wed 25 Mar 2015 08:46:02
# Commandline: stretcher
#   -auto
#   -stdout
#   -asequence emboss_stretcher-I20150325-084601-0791-34512226-oy.asequence
#   -bsequence emboss_stretcher-I20150325-084601-0791-34512226-oy.bsequence
#   -datafile EDNAFULL
#   -gapopen 16
#   -gapextend 4
#   -aformat3 pair
#   -snucleotide1
#   -snucleotide2
# Align_format: pair
# Report_file: stdout
#####

#=====
#
# Aligned_sequences: 2
# 1: EMBOSS_001
# 2: EMBOSS_001
# Matrix: EDNAFULL
# Gap_penalty: 16
# Extend_penalty: 4
#
# Length: 103
# Identity:      83/103 (80.6%)
# Similarity:   83/103 (80.6%)
# Gaps:         4/103 ( 3.9%)
# Score: 299
#
#
#=====
EMBOSS_001      1  --CTGACATCTCTGCCCTCTCGGTGTCTCCCAGGTGCAAGTGCAACCTG      48
                |||||..|||. |..|||. | |||||. |||||. |||||
EMBOSS_001      1  TGCTGACTCCTCC-CATTCTCTG-GTCTCCTCAGGTGTAAGTGCAACCTG      48

EMBOSS_001     49  CACGCCAACCTGTGCTCCATGCGCGAGGGCAGCCTGCAGTGCGAGTGCGA      98
                ||. ||||| |||||. ||..|||. ||||| ||||| |||||. ||
EMBOSS_001     49  CATGCCAACCTGTGCACAGTGCGAGAGGGCAGCCTGCAGTGTGAGTGTGA      98

EMBOSS_001     99  GCA      101
                .||
EMBOSS_001     99  ACA      101

#-----
#-----
```

rs2274855

```
#####
# Program: stretcher
# Rundate: Wed 14 Jan 2015 06:43:04
# Commandline: stretcher
#   -auto
#   -stdout
#   -asequence emboss_stretcher-I20150114-064303-0487-50576403-oy.asequence
#   -bsequence emboss_stretcher-I20150114-064303-0487-50576403-oy.bsequence
#   -datafile EDNAFULL
#   -gapopen 16
#   -gapextend 4
#   -aformat3 pair
#   -snucleotide1
#   -snucleotide2
# Align_format: pair
# Report_file: stdout
#####
```

```
#=====
#
# Aligned_sequences: 2
# 1: EMBOSS_001
# 2: EMBOSS_001
# Matrix: EDNAFULL
# Gap_penalty: 16
# Extend_penalty: 4
#
# Length: 101
# Identity:      99/101 (98.0%)
# Similarity:   100/101 (99.0%)
# Gaps:         0/101 ( 0.0%)
# Score: 492
#
#
#=====
```

```
EMBOSS_001      1 CAGGGAGGTGACACCCAGGCCCTTCCCCTGGGGCAGCCAGCTCACGCC      50
  |||
EMBOSS_001      1 CAGGGAGGTGACACCCAGGCCCTTCCCCTGGGGCAGCCAGCTCACGCC      50

EMBOSS_001     51 GTCTCTCTCCCACAGGTGCCACTGCAGGTTCCCTTTGGCAGTAAGTACACG     100
  : |||
EMBOSS_001     51 RTCTCTCTCCCACAGGTGCCGCTGCAGGTTCCCTTTGGCAGTAAGTACACG     100

EMBOSS_001     101 C      101
      |
EMBOSS_001     101 C      101
```

```
#-----
#-----
```

```
#####
# Program: stretcher
# Rundate: Thu 26 Mar 2015 07:35:36
# Commandline: stretcher
# -auto
# -stdout
# -asequence emboss_stretcher-I20150326-073535-0465-62224922-oy.asequence
# -bsequence emboss_stretcher-I20150326-073535-0465-62224922-oy.bsequence
# -datafile EDNAFULL
# -gapopen 16
# -gapextend 4
# -aformat3 pair
# -snucleotide1
# -snucleotide2
# Align_format: pair
# Report_file: stdout
#####
```

```
#=====
#
# Aligned_sequences: 2
# 1: EMBOSS_001
# 2: EMBOSS_001
# Matrix: EDNAFULL
# Gap_penalty: 16
# Extend_penalty: 4
#
# Length: 101
# Identity:      93/101 (92.1%)
# Similarity:    93/101 (92.1%)
# Gaps:          1/101 ( 1.0%)
# Score: 435
#
#
#=====
```

```
EMBOSS_001      1 CAGGGAGGTGACACCCAGGCCCTTCCCCTGGGGCAGCCAGCTCACGCC      50
  |||...|||
EMBOSS_001      1 CAGGGAGGTGACACCCAGGCCCTTCCCNNNNNNNGCCAGCTCACGCC      50

EMBOSS_001     51 GTCTCTCTCCCACAGGTGCCACTGCAGGTTCCCTTTGGCAGTAAGTACAG      100
  |||...|||
EMBOSS_001     51 GTCTCTCTCCCACAGGTGCCACTGCAGGTTCCCTTTGGCAGTAAGTACAG      100

EMBOSS_001     101 C      101
EMBOSS_001     101 -      100
```

```
#-----
#-----
```

#####

```

# Program: stretcher
# Rundate: Thu 26 Mar 2015 07:57:16
# Commandline: stretcher
#   -auto
#   -stdout
#   -asequence emboss_stretcher-I20150326-075714-0934-39788948-pg.asequence
#   -bsequence emboss_stretcher-I20150326-075714-0934-39788948-pg.bsequence
#   -datafile EDNAFULL
#   -gapopen 16
#   -gapextend 4
#   -aformat3 pair
#   -snucleotide1
#   -snucleotide2
# Align_format: pair
# Report_file: stdout
#####

```

#=====

```

#
# Aligned_sequences: 2
# 1: EMBOSS_001
# 2: EMBOSS_001
# Matrix: EDNAFULL
# Gap_penalty: 16
# Extend_penalty: 4
#
# Length: 101
# Identity:      32/101 (31.7%)
# Similarity:    32/101 (31.7%)
# Gaps:          0/101 ( 0.0%)
# Score: 22
#
#
#=====

```

```

EMBOSS_001      1 CAGGGAGGTGACACCCAGGCCCTTCCCCTGGGGCAGCCAGCTCACGCC      50
                  .....|
EMBOSS_001      1 NNNNNNNNNNNNNNNNNNNNNNNNNNNNNNNNNNNNNNNNNNNNGCCAGCTCACGCC      50

EMBOSS_001     51 GTCTCTCTCCACAGGTGCCACTGCAGGTTCCCTTTGGCAGTAAGTACAG      100
                  |||
EMBOSS_001     51 GTCTCTCTCCACAGGTGNNNNNNNNNNNNNNNNNNNNNNNNNNNNNNNNNNNN      100

EMBOSS_001     101 C      101
                  .
EMBOSS_001     101 N      101

```

#-----  
#-----

```
#####
# Program: stretcher
# Rundate: Thu 26 Mar 2015 07:58:11
# Commandline: stretcher
#   -auto
#   -stdout
#   -asequence emboss_stretcher-I20150326-075809-0766-84999412-es.asequence
#   -bsequence emboss_stretcher-I20150326-075809-0766-84999412-es.bsequence
#   -datafile EDNAFULL
#   -gapopen 16
#   -gapextend 4
#   -aformat3 pair
#   -snucleotide1
#   -snucleotide2
# Align_format: pair
# Report_file: stdout
#####
```

```
#=====
#
# Aligned_sequences: 2
# 1: EMBOSS_001
# 2: EMBOSS_001
# Matrix: EDNAFULL
# Gap_penalty: 16
# Extend_penalty: 4
#
# Length: 101
# Identity:      45/101 (44.6%)
# Similarity:   45/101 (44.6%)
# Gaps:         0/101 ( 0.0%)
# Score: 113
#
#
#=====
```

```
EMBOSS_001      1  CAGGGAGGTGACACCCAGGCCCTTCCCCTGGGGCAGCCAGCTCACGCC  50
      .....,|||
EMBOSS_001      1  NNNNNNNNNNNNNNNNNNNCCCTTCCCCTGGGGCAGCCAGCTCACGCC  50

EMBOSS_001     51  GTCTCTCTCCCACAGGTGCCACTGCAGGTTTCCTTTGGCAGTAAGTACAG  100
      |||.....
EMBOSS_001     51  GTCTCTCTCCCACAGNNNNNNNNNNNNNNNNNNNNNNNNNNNNNNNNNN  100

EMBOSS_001     101 C      101
      .
EMBOSS_001     101 N      101
```

```
#-----
#-----
```

```
#####
# Program: stretcher
# Rundate: Sat 3 Jan 2015 09:34:52
# Commandline: stretcher
# -auto
# -stdout
# -asequence emboss_stretcher-I20150103-093451-0373-1833134-es.asequence
# -bsequence emboss_stretcher-I20150103-093451-0373-1833134-es.bsequence
# -datafile EDNAFULL
# -gapopen 16
# -gapextend 4
# -aformat3 pair
# -snucleotide1
# -snucleotide2
# Align_format: pair
# Report_file: stdout
#####
```

```
#=====
#
# Aligned_sequences: 2
# 1: EMBOSS_001
# 2: EMBOSS_001
# Matrix: EDNAFULL
# Gap_penalty: 16
# Extend_penalty: 4
#
# Length: 101
# Identity:      99/101 (98.0%)
# Similarity:   99/101 (98.0%)
# Gaps:         0/101 ( 0.0%)
# Score: 487
#
#
#=====
```

```
EMBOSS_001      1 CAGGGAGGTGACACCCAGGCCCTTCCCCTGGGGCAGCCAGCTCACGCC      50
  |||
EMBOSS_001      1 CAGGGAGGTGACACCCAGGCCCTTCCCCTGGGGCAGCCAGCTCACGCC      50

EMBOSS_001     51 GTCTCTCTCCCACAGGTGCCACTGCAGGTTCCCTTTGGCAGTAAGTACACG     100
  .|||
EMBOSS_001     51 ATCTCTCTCCCACAGGTGCCGCTGCAGGTTCCCTTTGGCAGTAAGTACACG     100

EMBOSS_001     101 C      101
      |
EMBOSS_001     101 C      101
```

```
#-----
#-----
```



```
#####
# Program: stretcher
# Rundate: Thu 26 Mar 2015 08:01:35
# Commandline: stretcher
#   -auto
#   -stdout
#   -asequence emboss_stretcher-I20150326-080134-0766-72462402-oy.asequence
#   -bsequence emboss_stretcher-I20150326-080134-0766-72462402-oy.bsequence
#   -datafile EDNAFULL
#   -gapopen 16
#   -gapextend 4
#   -aformat3 pair
#   -snucleotide1
#   -snucleotide2
# Align_format: pair
# Report_file: stdout
#####
```

```
#=====
#
# Aligned_sequences: 2
# 1: EMBOSS_001
# 2: EMBOSS_001
# Matrix: EDNAFULL
# Gap_penalty: 16
# Extend_penalty: 4
#
# Length: 101
# Identity:      79/101 (78.2%)
# Similarity:    79/101 (78.2%)
# Gaps:          0/101 ( 0.0%)
# Score: 347
#
#
#=====
```

```
EMBOSS_001      1 CAGGGAGGTGACACCCAGGCCCTTCCCTGGGGCAGCCAGCTCACGCC      50
  |||
EMBOSS_001      1 CAGGGAGGTGACACCCAGGCCCTTCCCTGGGGCAGCCAGCTCACGCC      50
  |||
EMBOSS_001     51 GTCTCTCTCCACAGGTGCCACTGCAGGTTTCCTTTGGCAGTAAGTACAG      100
  .|||
EMBOSS_001     51 ATCTCTCTCCACAGGTGCCGCTGCAGGTTTCNNNNNNNNNNNNNNNNNN      100
  .|||
EMBOSS_001     101 C      101
  .
EMBOSS_001     101 N      101
```

```
#-----
#-----
```

```
#####
# Program: stretcher
# Rundate: Sun  4 Jan 2015 08:04:40
# Commandline: stretcher
#   -auto
#   -stdout
#   -asequence emboss_stretcher-I20150104-080439-0888-96191266-es.asequence
#   -bsequence emboss_stretcher-I20150104-080439-0888-96191266-es.bsequence
#   -datafile EDNAFULL
#   -gapopen 16
#   -gapextend 4
#   -aformat3 pair
#   -snucleotide1
#   -snucleotide2
# Align_format: pair
# Report_file: stdout
#####
```

```
#=====
#
# Aligned_sequences: 2
# 1: EMBOSS_001
# 2: EMBOSS_001
# Matrix: EDNAFULL
# Gap_penalty: 16
# Extend_penalty: 4
#
# Length: 101
# Identity:      38/101 (37.6%)
# Similarity:    38/101 (37.6%)
# Gaps:          0/101 ( 0.0%)
# Score: 62
#
#
#=====
```

|            |     |                                                       |     |
|------------|-----|-------------------------------------------------------|-----|
| EMBOSS_001 | 1   | CAGGGAGGTGACACCCAGGCCCTTCCCCTGGGGCAGCCAGCTCACGCC      | 50  |
|            |     | .....                                                 |     |
| EMBOSS_001 | 1   | NNNNNNNNNNNNNNNNNNNNNNNNNNNNCCCTGGGGCAGCCAGCTCACGCC   | 50  |
| EMBOSS_001 | 51  | GTCTCTCTCCACAGGTGCCACTGCAGGTTTCCTTTGGCAGTAAGTACAG     | 100 |
|            |     |                                                       |     |
| EMBOSS_001 | 51  | GTCTCTCTCCCATAGNNNNNNNNNNNNNNNNNNNNNNNNNNNNNNNNNNNNNN | 100 |
| EMBOSS_001 | 101 | C                                                     | 101 |
|            |     | .                                                     |     |
| EMBOSS_001 | 101 | N                                                     | 101 |

```
#-----
#-----
```

```
#####
# Program: stretcher
# Rundate: Sat 3 Jan 2015 11:57:34
# Commandline: stretcher
# -auto
# -stdout
# -asequence emboss_stretcher-I20150103-115733-0433-33962685-oy.asequence
# -bsequence emboss_stretcher-I20150103-115733-0433-33962685-oy.bsequence
# -datafile EDNAFULL
# -gapopen 16
# -gapextend 4
# -aformat3 pair
# -snucleotide1
# -snucleotide2
# Align_format: pair
# Report_file: stdout
#####
```

```
#=====
#
# Aligned_sequences: 2
# 1: EMBOSS_001
# 2: EMBOSS_001
# Matrix: EDNAFULL
# Gap_penalty: 16
# Extend_penalty: 4
#
# Length: 101
# Identity:      71/101 (70.3%)
# Similarity:   71/101 (70.3%)
# Gaps:         0/101 ( 0.0%)
# Score: 293
#
#
#=====
```

```
EMBOSS_001      1 CAGGGAGGTGACACCCAGGCCCTTCCCCTGGGGCAGCCAGCTCACGCC      50
  |||
EMBOSS_001      1 CAGGGAGGTGACACCCAGGCCCTTCCCCTGGGGCAGCCAGCTCACGCC      50
  |||
EMBOSS_001     51 GTCTCTCTCCCACAGGTGCCACTGCAGGTTCCCTTTGGCAGTAAGTACACG     100
  |||.....|
EMBOSS_001     51 GTCTCTCTANNNNNNNNNNNNNNNNNNNNNNNNNNNNNNNNAGTAAGTACACG     100

EMBOSS_001     101 C      101
      |
EMBOSS_001     101 C      101
```

```
#-----
#-----
```

```
#####
# Program: stretcher
# Rundate: Thu 26 Mar 2015 08:04:58
# Commandline: stretcher
#   -auto
#   -stdout
# -asequence emboss_stretcher-I20150326-080457-0200-69787751-oy.asequence
# -bsequence emboss_stretcher-I20150326-080457-0200-69787751-oy.bsequence
# -datafile EDNAFULL
# -gapopen 16
# -gapextend 4
# -aformat3 pair
# -snucleotide1
# -snucleotide2
# Align_format: pair
# Report_file: stdout
#####
```

```
#=====
#
# Aligned_sequences: 2
# 1: EMBOSS_001
# 2: EMBOSS_001
# Matrix: EDNAFULL
# Gap_penalty: 16
# Extend_penalty: 4
#
# Length: 101
# Identity:      85/101 (84.2%)
# Similarity:   85/101 (84.2%)
# Gaps:         0/101 ( 0.0%)
# Score: 391
#
#
#=====
```

```
EMBOSS_001      1 CAGGGAGGTGACACCCAGGCCCTTCCCCTGGGGCAGCCAGCTCACGCC      50
                .....|||.....
EMBOSS_001      1 NNNNNNNNNNACACCCAGGCCCTTCCCCTGGGGCAGCCAGCTCACGCC      50

EMBOSS_001     51 GTCTCTCTCCACAGGTGCCACTGCAGGTTCCCTTTGGCAGTAAGTACAG      100
                |||.....
EMBOSS_001     51 GTCTCTCTCCACAGGTGCCGCTGCAGGTTCCCTTTGGCAGTAAGTANNN      100

EMBOSS_001     101 C      101
                .
EMBOSS_001     101 N      101
```

```
#-----
#-----
```

```
#####
# Program: stretcher
# Rundate: Wed 29 Oct 2014 04:39:18
# Commandline: stretcher
# -auto
# -stdout
# -asequence emboss_stretcher-I20141029-043917-0031-85897828-es.asequence
# -bsequence emboss_stretcher-I20141029-043917-0031-85897828-es.bsequence
# -datafile EDNAFULL
# -gapopen 16
# -gapextend 4
# -aformat3 pair
# -snucleotide1
# -snucleotide2
# Align_format: pair
# Report_file: stdout
#####
```

```
#=====
#
# Aligned_sequences: 2
# 1: EMBOSS_001
# 2: EMBOSS_001
# Matrix: EDNAFULL
# Gap_penalty: 16
# Extend_penalty: 4
#
# Length: 101
# Identity:      100/101 (99.0%)
# Similarity:   100/101 (99.0%)
# Gaps:         0/101 ( 0.0%)
# Score: 496
#
#
#=====
```

```
EMBOSS_001      1 CAGGGAGGTGACACCCAGGCCCTTCCCCTGGGGCAGCCAGCTCACGCC      50
  |||
EMBOSS_001      1 CAGGGAGGTGACACCCAGGCCCTTCCCCTGGGGCAGCCAGCTCACGCC      50

EMBOSS_001     51 GTCTCTCTCCCACAGGTGCCACTGCAGGTTCTTTGGCAGTAAGTACACG     100
  |||
EMBOSS_001     51 GTCTCTCTCCCACAGGTGCCGCTGCAGGTTCTTTGGCAGTAAGTACACG     100

EMBOSS_001     101 C      101
      |
EMBOSS_001     101 C      101
```

```
#-----
#-----
```

```
#####
# Program: stretcher
# Rundate: Sat 25 Oct 2014 08:14:25
# Commandline: stretcher
# -auto
# -stdout
# -asequence emboss_stretcher-I20141025-081421-0467-61647112-es.asequence
# -bsequence emboss_stretcher-I20141025-081421-0467-61647112-es.bsequence
# -datafile EDNAFULL
# -gapopen 16
# -gapextend 4
# -aformat3 pair
# -snucleotide1
# -snucleotide2
# Align_format: pair
# Report_file: stdout
#####
```

```
#=====
#
# Aligned_sequences: 2
# 1: EMBOSS_001
# 2: EMBOSS_001
# Matrix: EDNAFULL
# Gap_penalty: 16
# Extend_penalty: 4
#
# Length: 101
# Identity:      100/101 (99.0%)
# Similarity:    100/101 (99.0%)
# Gaps:          0/101 ( 0.0%)
# Score: 496
#
#
#=====
```

```
EMBOSS_001      1 CAGGGAGGTGACACCCAGGCCCTTCCCTGGGGCAGCCAGCTCACGCC      50
  |||
EMBOSS_001      1 CAGGGAGGTGACACCCAGGCCCTTCCCTGGGGCAGCCAGCTCACGCC      50

EMBOSS_001     51 GTCTCTCTCCCACAGGTGCCACTGCAGGTTCTTTGGCAGTAAGTACACG     100
  |||
EMBOSS_001     51 GTCTCTCTCCCACAGGTGCCGCTGCAGGTTCTTTGGCAGTAAGTACACG     100

EMBOSS_001     101 C      101
      |
EMBOSS_001     101 C      101
```

```
#-----
#-----
```

```
#####
# Program: stretcher
# Rundate: Sat 15 Nov 2014 05:27:00
# Commandline: stretcher
# -auto
# -stdout
# -asequence emboss_stretcher-I20141115-052659-0557-78423949-pg.asequence
# -bsequence emboss_stretcher-I20141115-052659-0557-78423949-pg.bsequence
# -datafile EDNAFULL
# -gapopen 16
# -gapextend 4
# -aformat3 pair
# -snucleotide1
# -snucleotide2
# Align_format: pair
# Report_file: stdout
#####
```

```
#=====
#
# Aligned_sequences: 2
# 1: EMBOSS_001
# 2: EMBOSS_001
# Matrix: EDNAFULL
# Gap_penalty: 16
# Extend_penalty: 4
#
# Length: 101
# Identity:      41/101 (40.6%)
# Similarity:    41/101 (40.6%)
# Gaps:          0/101 ( 0.0%)
# Score: 85
#
#
#=====
```

```
EMBOSS_001      1 CAGGGAGGTGACACCCAGGCCCTTCCCTGGGGCAGCCAGCTCACGCC      50
                  .....|
EMBOSS_001      1 NNNNNNNNNNNNNNNNNNNNNNNNNNNCCCTGGGGCAGCCAGCTCACGCC      50

EMBOSS_001     51 GTCTCTCTCCCACAGGTGCCACTGCAGGTTCTTTGGCAGTAAGTACAG      100
                  |||
EMBOSS_001     51 GTCTCTCTCCANNNNNNNNNNNNNNNNNNNNNNNNNNNNNNNNNNNNNNNNNACG      100

EMBOSS_001     101 C      101
                   |
EMBOSS_001     101 C      101
```

```
#-----
#-----
```

```
#####
# Program: stretcher
# Rundate: Tue 13 Jan 2015 08:05:46
# Commandline: stretcher
#   -auto
#   -stdout
#   -asequence emboss_stretcher-I20150113-080545-0086-4807703-pg.asequence
#   -bsequence emboss_stretcher-I20150113-080545-0086-4807703-pg.bsequence
#   -datafile EDNAFULL
#   -gapopen 16
#   -gapextend 4
#   -aformat3 pair
#   -snucleotide1
#   -snucleotide2
# Align_format: pair
# Report_file: stdout
#####
```

```
#=====
#
# Aligned_sequences: 2
# 1: EMBOSS_001
# 2: EMBOSS_001
# Matrix: EDNAFULL
# Gap_penalty: 16
# Extend_penalty: 4
#
# Length: 101
# Identity:      99/101 (98.0%)
# Similarity:   99/101 (98.0%)
# Gaps:         0/101 ( 0.0%)
# Score: 487
#
#
#=====
```

```
EMBOSS_001      1 CAGGGAGGTGACACCCAGGCCCTTCCCTGGGGCAGCCAGCTCACGCC      50
  |||
EMBOSS_001      1 CAGGGAGGTGACACCCAGGCCCTTCCCTGGGGCAGCCAGCTTACGCC      50
  |||

EMBOSS_001     51 GTCTCTCTCCACAGGTGCCACTGCAGGTTTCCTTTGGCAGTAAGTACACG     100
  |||
EMBOSS_001     51 GTCTCTCTCCACAGGTGCCGCTGCAGGTTTCCTTTGGCAGTAAGTACACG     100
  |||

EMBOSS_001     101 C      101
      |
EMBOSS_001     101 C      101
```

```
#-----
#-----
```



#####

# Program: stretcher
# Rundate: Thu 26 Mar 2015 08:21:38
# Commandline: stretcher
# -auto
# -stdout
# -asequence emboss\_stretcher-I20150326-082137-0400-55844718-oy.asequence
# -bsequence emboss\_stretcher-I20150326-082137-0400-55844718-oy.bsequence
# -datafile EDNAFULL
# -gapopen 16
# -gapextend 4
# -aformat3 pair
# -snucleotide1
# -snucleotide2
# Align\_format: pair
# Report\_file: stdout
#####

#=====

#
# Aligned\_sequences: 2
# 1: EMBOSS\_001
# 2: EMBOSS\_001
# Matrix: EDNAFULL
# Gap\_penalty: 16
# Extend\_penalty: 4
#
# Length: 225
# Identity: 193/225 (85.8%)
# Similarity: 193/225 (85.8%)
# Gaps: 2/225 ( 0.9%)
# Score: 813
#
#
#=====

EMBOSS\_001 1 CCTCCAGGTGCTCCCCTGCCCTGCTGGCCCTCTGCAGGGAGGTGACACC 50
EMBOSS\_001 1 CCCAAGTGTCTTCTCCTGCCCTGCTGGCTCCTCTGCTGGGGGACACAAC 50
EMBOSS\_001 51 CAGGCCCTTCCCCTGGGGCAGCCAGCTCACGCCGCTCTCTCTCCACAG 100
EMBOSS\_001 51 CAGGCCCTCCCCACAGGCAGCCAGCTCATGCCCTCTCTCTCCGCAG 100
EMBOSS\_001 101 GTGCCACTGCAGGTTCTTTGGCAGTAAGTACACGCCTGGGGAGGGTGGC 150
EMBOSS\_001 101 GTTCCGCTGCAGGTTCTTTGGCAGTAAGTAAAGGCCGTGGAGGGCGGC 150
EMBOSS\_001 151 CAGGGCCCCACTGCACGAGCCTCTTTGCATGTCCTGGAAAAAGCTGGAG 200
EMBOSS\_001 151 C-GGGGCCCACTGCACCAGCCTCTTTGCATGTCCTGGAAAAAGCAGGAG 199
EMBOSS\_001 201 AGAAAAAAGGGGCTTCAGTGTC-CC 224
EMBOSS\_001 200 AGAAAAAAGGGGCTTCGGTGTCACC 224

#-----
#-----

```
#####
# Program: stretcher
# Rundate: Mon 27 Oct 2014 07:16:17
# Commandline: stretcher
#   -auto
#   -stdout
#   -asequence emboss_stretcher-I20141027-071616-0156-66135972-pg.asequence
#   -bsequence emboss_stretcher-I20141027-071616-0156-66135972-pg.bsequence
#   -datafile EDNAFULL
#   -gapopen 16
#   -gapextend 4
#   -aformat3 pair
#   -snucleotide1
#   -snucleotide2
# Align_format: pair
# Report_file: stdout
#####
```

```
#=====
#
# Aligned_sequences: 2
# 1: EMBOSS_001
# 2: EMBOSS_001
# Matrix: EDNAFULL
# Gap_penalty: 16
# Extend_penalty: 4
#
# Length: 101
# Identity:      85/101 (84.2%)
# Similarity:    85/101 (84.2%)
# Gaps:          0/101 ( 0.0%)
# Score: 361
#
#
#=====
```

```
EMBOSS_001      1 CAGGGAGGTGACACCCAGGCCCTTCCCTGGGGCAGCCAGCTCACGCC      50
  |.|||.|||.|||.|||.|||.|||.|||.|||.|||.|||.|||.|||.|||.
EMBOSS_001      1 CTGGGGGGACACAACCAGGCCCTCCCCACAGGCAGCCAGCTCATGCC      50
                                int (4-5)/exon 5                exon 5/int (5-6)
EMBOSS_001     51 GTCTCTCTCCCACAGGTGCCACTGCAGGTTCCCTTGGCAGTAAGTACACG    100
  .|||.|||.|||.|||.|||.|||.|||.|||.|||.|||.|||.|||.|||.
EMBOSS_001     51 CTCTCTCTCCCGCAGGTTCCGCTGCAGGTTCCCTTGGCAGTAAGTAAAGG    100

EMBOSS_001     101 C      101
      |
EMBOSS_001     101 C      101
```

```
#-----
#-----
```

|            |      |                                                     |      |
|------------|------|-----------------------------------------------------|------|
| EMBOSS_001 | 2242 | AAACAGTT-----TACAGTGTCCATCTGCAAAATGGACTAAAAGCAG     | 2284 |
| EMBOSS_001 | 3328 | TTCCTCCCTCCCAGGGCTGAAGTGAGGATGAA-ATGGG-ATAATCCA---  | 3372 |
| EMBOSS_001 | 2285 | --CCTTCAGGC--AGTCAGTAGCGAGAGTCCACATAGGTATGATCCCACT  | 2330 |
| EMBOSS_001 | 3373 | -----CCCCGTCCCCACACCCTG-CAGGTCATC-ATGATTGCTAGCA     | 3413 |
| EMBOSS_001 | 2331 | GAGGATGCCCTGTGACCAGACAGTCTCAGGCCCTCTAAGTCTCCTTCCC   | 2380 |
| EMBOSS_001 | 3414 | GTTGTGTGGTGGAGCAGGTGCTCTTGAGGGAGCGACACCTCCAGGTGCTC  | 3463 |
| EMBOSS_001 | 2381 | TT----TAGTGGGGCTGGAA-----GACACTTCTGTG-GCTC          | 2412 |
| EMBOSS_001 | 3464 | CCCTGCCCTGCTGGCC--CCTCTGCAGGGAGGTGACACCCAGGCCCTTC   | 3511 |
| EMBOSS_001 | 2413 | CCCATTCCTGTAGACTTTCCTGTGCCAAGTGGAGGTGGCCAGGCC-----  | 2457 |
| EMBOSS_001 | 3512 | CCCTGGGGCAGCCAGCTCACGCCCGTCTCTCTCCC-ACAGGTGCCACTGC  | 3560 |
| EMBOSS_001 | 2458 | --TTGTGTCTAACA-CTGTAACCC-TCTGTGCCCTACAGGTGCGGCCGC   | 2503 |
| EMBOSS_001 | 3561 | AGGTTCC--TTTGGCAGTAAGTACACGCC TGGGGAGGGTGGCCAGGGCC  | 3607 |
| EMBOSS_001 | 2504 | GGGCTCCGCCTTTGGCAGTAAGTAC-----CTTG-----             | 2532 |
| EMBOSS_001 | 3608 | CCCACTGCACGAGCCTCTTTGCATGTCCCTGGAAAAAGCTGGAGAGAAAAA | 3657 |
| EMBOSS_001 | 2533 | --CTCTGTAC-ATACTC--TGCA--GCCAGGC-----CTGGAGA-----   | 2564 |
| EMBOSS_001 | 3658 | AGGGGCTTCAGTGTCCCCTCTGGGACTTGGGCCTATTCACCTCCCTCCTCT | 3707 |
| EMBOSS_001 | 2565 | TGGGCATGAGGGGCTGCTCT-----CTCTCT-----                | 2591 |
| EMBOSS_001 | 3708 | AATTACACCCCATCTGCTTCTCCACCTCTCCCCCTCCACCTCCCCCCT    | 3757 |
| EMBOSS_001 | 2592 | -----ATCT-CTGCTC--CCTCTCCTCCGTGTACC-----            | 2618 |
| EMBOSS_001 | 3758 | CCACCCATCCCCACTTCACATCATATGCCATGTGTCATGTGTCATTTTGC  | 3807 |
| EMBOSS_001 | 2619 | -----CTACTGCACCTAATC-----GCATCTGTCC-----            | 2643 |
| EMBOSS_001 | 3808 | TGTGGCCTGTGGCCAGCAACTCTCAGGCTCTCCAGGAGCTCCATCAGT    | 3857 |
| EMBOSS_001 | 2644 | ----GCCT----CCCACCCTCCCTCAGG-TCTCCTAGGAGCTTTCTTA-T  | 2683 |
| EMBOSS_001 | 3858 | GCTGCTTTGGAAAACGGGACAGGACTTTT-----TGCAGGTCTCTTGGC   | 3901 |
| EMBOSS_001 | 2684 | GCTGCTTTG-AAAGAAGGACGGGGCTTTTGTGTGATTGGGGTCCCCTGAC  | 2732 |
| EMBOSS_001 | 3902 | CCCTGGGTGGGCTCCCTGCTCCTCCTGCCACCCACGCCACTTCTC-TCAC  | 3950 |
| EMBOSS_001 | 2733 | CCCTGAGTGGAC-----GGAACCC---CCTGTCTCCTCAC            | 2765 |
| EMBOSS_001 | 3951 | CTGGATCTGGGAGAGCAGTCTCTCCTGCCAGTCAAGAGTGGGGTGCACCTT | 4000 |
| EMBOSS_001 | 2766 | C--GTTCTG----TGCTTTGTGCACAGCCAG---ATACAGGGG---CCTT  | 2803 |
| EMBOSS_001 | 4001 | CCCCACCAGGGGCAGAATCCA-CCCCCT-AGCCTAACCATGGGGGCAGC   | 4048 |
| EMBOSS_001 | 2804 | CTCTG--CTAGATCAATGTCTGTCCCCCTGAGTTTGACCT----GGTA-C  | 2846 |
| EMBOSS_001 | 4049 | CTCCCTCTGGGCAGCCTCTGCAGCCAGCTTGTCCCAGGGCTCTGCTCGTC  | 4098 |

```
#####
# Program: stretcher
# Rundate: Mon 27 Oct 2014 08:21:21
# Commandline: stretcher
#   -auto
#   -stdout
#   -asequence emboss_stretcher-I20141027-082120-0258-93813620-es.asequence
#   -bsequence emboss_stretcher-I20141027-082120-0258-93813620-es.bsequence
#   -datafile EDNAFULL
#   -gapopen 16
#   -gapextend 4
#   -aformat3 pair
#   -snucleotide1
#   -snucleotide2
# Align_format: pair
# Report_file: stdout
#####
```

```
#=====
#
# Aligned_sequences: 2
# 1: EMBOSS_001
# 2: EMBOSS_001
# Matrix: EDNAFULL
# Gap_penalty: 16
# Extend_penalty: 4
#
# Length: 106
# Identity:      58/106 (54.7%)
# Similarity:   58/106 (54.7%)
# Gaps:         11/106 (10.4%)
# Score: 26
#
#
#=====
```

```
EMBOSS_001      1  CAGGGAGGTGACACCCAGGCC-CCTTCCCCTGGGGCAGCCAGCTCACGCC      49
                .....|.|......|||.. ||...||.|.|.|.|.|| |.....|
EMBOSS_001      1  TTCTGTGCCAAGTGAGGTGGCCAGGCCTTGTGTCTAACA-CTGTAACC      49
                    int (4-5)/exon 5                         exon 5/int (5-6)
EMBOSS_001     50  CGTCTCTCTCCC-ACAGGTGCCACTGCAGGTTC---TTTGGCAGTAAGT      95
                |...|.|.|| | |||||..|.|.|.|.|| | |||||
EMBOSS_001     50  C-TCTGTGCCCTACAGGTGCGGCCGCGGGCTCCGCCTTTGGCAGTAAGT      98
                    |
EMBOSS_001     96  ACACGC          101
                    ||
EMBOSS_001     99  AC-----      100
```

```
#-----
#-----
```

Netrin-G1

Cookies on EMBL-EBI website

This website uses cookies to store a small amount of information on your computer, as part of the functioning of the site. Cookies used for the operation of the site have already been set.

To find out more about the cookies we use and how to delete them, see our [Cookie](#) and [Privacy](#) statements.

Dismiss this notice

# EMBOSS Stretcher

[Tools](#) > [Pairwise Sequence Alignment](#) > EMBOSS Stretcher

Results for job emboss\_stretcher-I20141224-074231-0080-6402773-oy

```
#####
# Program: stretcher
# Rundate: Wed 24 Dec 2014 07:42:32
# Commandline: stretcher
#   -auto
#   -stdout
#   -asequence emboss_stretcher-I20141224-074231-0080-6402773-oy.aupfile
#   -bsequence emboss_stretcher-I20141224-074231-0080-6402773-oy.bupfile
#   -datafile EBLOSUM62
#   -gapopen 12
#   -gapextend 2
#   -aformat3 pair
#   -sprotein1
#   -sprotein2
# Align_format: pair
# Report_file: stdout
#####
```

```
#-----
#
# Aligned_sequences: 2
# 1:
# 2:
# Matrix: EBLOSUM62
# Gap_penalty: 12
# Extend_penalty: 2
#
# Length: 581
# Identity:      576/581 (99.1%)
# Similarity:   577/581 (99.3%)
# Gaps:         0/581 ( 0.0%)
# Score: 3218
#
#-----
```

```
1 MYLSRFLSIHALWVTVSSVMQPYPLVWGHYDLCKTQIYTEEGKVWDYMAC 50
  |||
1 MYLSRFLSIHALWVTVSSVMQPYPLVWGHYDLCKTQIYTEEGKVWDYMAC 50
```

```

51 QPESTDMTKYLKVKLDPPDITCGDPPETF CAMGNPYMCNNECDASTPELA 100
   |||
51 QPESTDMTKYLKVKLDPPDITCGDPPETF CAMGNPYMCNNECDASTPELA 100

101 HPPELMFDFEGRHPSTFWQSATWKEYPKPLQVNI TLSWSKTIELTDNIVI 150
   |||
101 HPPELMFDFEGRHPSTFWQSATWKEYPKPLQVNI TLSWSKTIELTDNIVI 150

151 TFESGRPDQ MILEKSLDYGR TWQPYQYYATDCLDAFHMDPKSVKDL SQHT 200
   |||
151 TFESGRPDQ MILEKSLDYGR TWQPYQYYATDCLDAFHMDPKSVKDL SQHT 200

201 VLEI ICTEEYSTGYTTNSKIIHF EIKDRFAFFAGPRLRN MASLYGQ LDTT 250
   |||
201 VLEI ICTEEYSTGYTTNSKIIHF EIKDRFAFFAGPRLRN MASLYGQ LDTT 250

251 KKL R DFFTV TDLRIRLLRPAVGEIFVDELHLARYFYAISDIKVRGRCKCN 300
   |||
251 KKL R DFFTV TDLRIRLLRPAVGEIFVDELHLARYFYAISDIKVRGRCKCN 300

301 LHATVCVYD NSKLTCECEHNTTGPDCGCKKKNYQGRPWSPGSYLP I PKGT 350
   |||
301 LHATVCVYD NSKLTCECEHNTTGPDCGCKKKNYQGRPWSPGSYLP I PKGT 350

351 ANTCIPSISSIGNPPKFNR IWPNISSLEVSNPKQVAPKLALSTVSSVQVA 400
   ||| : ||| . |||
351 ANTCIPSISSIGSPPKFNR IWPNISSLEVSNPKQVAPKLALSTVSSVQVA 400

401 NHKRDCECFGHSNRCSYIDLLNTVICVSKHNTRGQHCELCRLGYFRNAS 450
   ||| . |||
401 NHKRGCECFGHSNRCSYIDLLNTVICVSKHNTRGQHCELCRLGYFRNAS 450

451 AQLDDENVCIECYCNPLGSIHDCN GSGFCECKTGTGPKCDECLPGNSW 500
   ||| . |||
451 AQLDDENVCIGCYCNPLGSIHDCN GSGFCECKTGTGPKCDECLPGNSW 500

501 HYGCPNVCDNELLHCQNGGTCHNNVRCLCPAA YTGILCEKLRCEEAGSC 550
   ||| . |||
501 HYGQRNVCDNELLHCQNGGTCHNNVRCLCPAA YTGILCEKLRCEEAGSC 550

551 GSDSGQGAPPHGSPALLLTTLLGTASPLVF 581
   |||
551 GSDSGQGAPPHGSPALLLTTLLGTASPLVF 581

```

```

#-----
#-----

```

Cookies on EMBL-EBI website

This website uses cookies to store a small amount of information on your computer, as part of the functioning of the site. Cookies used for the operation of the site have already been set.

To find out more about the cookies we use and how to delete them, see our [Cookie](#) and [Privacy](#) statements.

Dismiss this notice

# EMBOSS Stretcher

[Tools](#) > [Pairwise Sequence Alignment](#) > EMBOSS Stretcher

Results for job emboss\_stretcher-I20141114-081823-0327-28698407-pg

```
#####
# Program: stretcher
# Rundate: Fri 14 Nov 2014 08:18:24
# Commandline: stretcher
#   -auto
#   -stdout
#   -asequence emboss_stretcher-I20141114-081823-0327-28698407-pg.aupfile
#   -bsequence emboss_stretcher-I20141114-081823-0327-28698407-pg.bupfile
#   -datafile EBLOSUM62
#   -gapopen 12
#   -gapextend 2
#   -aformat3 pair
#   -sprotein1
#   -sprotein2
# Align_format: pair
# Report_file: stdout
#####
```

```
#=====
#
# Aligned_sequences: 2
# 1:
# 2:
# Matrix: EBLOSUM62
# Gap_penalty: 12
# Extend_penalty: 2
#
# Length: 581
# Identity:      556/581 (95.7%)
# Similarity:    556/581 (95.7%)
# Gaps:          0/581 ( 0.0%)
# Score: 3097
#
#
#=====
```

```
1 MYLSRFLSIHALWVTVSSVMQPYPLVWGHYDLCKTQIYTEEGKVWDYMAC 50
| | | | | | | | | | | | | | | | | | | | | | | | | | | | | |
1 MYLSRFLSIHALWVTVSSVMQPYPLVWGHYDLCKTQIYTEEGKVWDYMAC 50
```



```

51 QPESTDMTKYLKVKLDPPDITCGDPPETFCAMGNPYMCNNECDASTPELA 100
   |||
51 QPESTDMTKYLKVKLDPPDITCGDPPETFCAMGNPYMCNNECDASTPELA 100

101 HPELMFDFEGRHPSTFWQSATWKEYPKPLQVNITLSWSKTIELTDNIVI 150
   |||
101 HPELMFDFEGRHPSTFWQSATWKEYPKPLQVNITLSWSKTIELTDNIVI 150

151 TFESGRPDQMIKESLDYGRTWQPYQYYATDCLDAFHMDPKSVKDLQHT 200
   |||
151 TFESGRPDQMIKESLDYGRTWQPYQYYATDCLDAFHMDPKSVKDLQHT 200

201 VLEIICTEEYSTGYTTNSKIIHFEIKDRFAFFAGPRLRNMASLYGQD TT 250
   |||
201 VLEIICTEEYSTGYTTNSKIIHFEIKDRFAFFAGPRLRNMASLYGQD TT 250

251 KKL R D F F T V T D L R I R L L R P A V G E I F V D E L H L A R Y F Y A I S D I K V R G R C K C N 300
   |||
251 KKL R D F F T V T D L R I R L L R P A V G E I F V D E L H L A R Y F Y A I S D I K V R G R C K C N 300

301 L H A T V C V Y D N S K L T C E C E H N T T G P D C G K C K N Y Q G R P W S P G S Y L P I P K G T 350
   |||
301 L H A T V C V Y D N S K L T C E C E H N T T G P D C G K C K N Y Q G R P W S P G S Y L P I P K G T 350

351 A N T C I P S I S S I G N P P K F N R I W P N I S S L E V S N P K Q V A P K L A L S T V S S V Q V A 400
   |||. . . . . |||
351 A N T X X X X X X X X X X P P K F N R I W P N I S S L E V S N P K Q V A P K L A L S T V S S V Q V A 400

401 N H K R D C E C F G H S N R C S Y I D L L N T V I C V S C K H N T R G Q H C E L C R L G Y F R N A S 450
   |||
401 N H K R D C E C F G H S N R C S Y I D L L N T V I C V S C K H N T R G Q H C E L C R L G Y F R N A S 450

451 A Q L D D E N V C I E C Y C N P L G S I H D R C N G S G F C E C K T G T T G P K C D E C L P G N S W 500
   |||
451 A Q L D D E N V C I E C Y C N P L G S I H D R C N G S G F C E C K T G T T G P K C D E C L P G N S W 500

501 H Y G C Q P N V C D N E L L H C Q N G G T C H N N V R C L C P A A Y T G I L C E K L R C E E A G S C 550
   |||. . . . . |||
501 H Y G C Q P N V C D N E L L H C Q N G G T C H N N V R C L C P A A Y T G I L C E K L R X X X X X X X 550

551 G S D S G Q G A P P H G S P A L L L L T T L L G T A S P L V F 581
   . . . . . |||
551 X X X X X X X P P H G S P A L L L L T T L L G T A S P L V F 581
    
```

```

#-----
#-----
    
```

Cookies on EMBL-EBI website

This website uses cookies to store a small amount of information on your computer, as part of the functioning of the site. Cookies used for the operation of the site have already been set.

To find out more about the cookies we use and how to delete them, see our [Cookie](#) and [Privacy](#) statements.

Dismiss this notice

# EMBOSS Stretcher

[Tools](#) > [Pairwise Sequence Alignment](#) > EMBOSS Stretcher

Results for job emboss\_stretcher-I20150104-082500-0254-33035958-es

```
#####
# Program: stretcher
# Rundate: Sun 4 Jan 2015 08:25:01
# Commandline: stretcher
# -auto
# -stdout
# -asequence emboss_stretcher-I20150104-082500-0254-33035958-es.aupfile
# -bsequence emboss_stretcher-I20150104-082500-0254-33035958-es.bupfile
# -datafile EBLOSUM62
# -gapopen 12
# -gapextend 2
# -aformat3 pair
# -sprotein1
# -sprotein2
# Align_format: pair
# Report_file: stdout
#####
```

```
#=====
#
# Aligned_sequences: 2
# 1:
# 2:
# Matrix: EBLOSUM62
# Gap_penalty: 12
# Extend_penalty: 2
#
# Length: 581
# Identity: 581/581 (100.0%)
# Similarity: 581/581 (100.0%)
# Gaps: 0/581 ( 0.0%)
# Score: 3253
#
#=====
```

```
1 MYLSRFLSIHALWVTVSSVMQPYPLVWGHYDLCKTQIYTEEGKVWDYMAC 50
  |||
1 MYLSRFLSIHALWVTVSSVMQPYPLVWGHYDLCKTQIYTEEGKVWDYMAC 50
```

```

51 QPESTDMTKYLKVKLDPPDITCGDPPETF CAMGNPYMCNNECDASTPELA 100
   |||||||
51 QPESTDMTKYLKVKLDPPDITCGDPPETF CAMGNPYMCNNECDASTPELA 100

101 HPPELMFDFEGRHPSTFWQSATWKEYPKPLQVNI TLSWSKTIELTDNIVI 150
   |||||||
101 HPPELMFDFEGRHPSTFWQSATWKEYPKPLQVNI TLSWSKTIELTDNIVI 150

151 TFESGRPDQ MILEKSLDYGR TWQPYQYYATDCLDAFHMDPKSVKDLSQHT 200
   |||||||
151 TFESGRPDQ MILEKSLDYGR TWQPYQYYATDCLDAFHMDPKSVKDLSQHT 200

201 VLEI ICTEEYSTGYTTNSKIIHF EIKDRFAFFAGPRLRN MASLYGQ LDTT 250
   |||||||
201 VLEI ICTEEYSTGYTTNSKIIHF EIKDRFAFFAGPRLRN MASLYGQ LDTT 250

251 KKL R D F F T V T D L R I R L L R P A V G E I F V D E L H L A R Y F Y A I S D I K V R G R C K C N 300
   |||||||
251 KKL R D F F T V T D L R I R L L R P A V G E I F V D E L H L A R Y F Y A I S D I K V R G R C K C N 300

301 L H A T V C V Y D N S K L T C E C E H N T T G P D C G K C K K N Y Q G R P W S P G S Y L P I P K G T 350
   |||||||
301 L H A T V C V Y D N S K L T C E C E H N T T G P D C G K C K K N Y Q G R P W S P G S Y L P I P K G T 350

351 A N T C I P S I S S I G N P P K F N R I W P N I S S L E V S N P K Q V A P K L A L S T V S S V Q V A 400
   |||||||
351 A N T C I P S I S S I G N P P K F N R I W P N I S S L E V S N P K Q V A P K L A L S T V S S V Q V A 400

401 N H K R D C E C F G H S N R C S Y I D L L N T V I C V S C K H N T R G Q H C E L C R L G Y F R N A S 450
   |||||||
401 N H K R D C E C F G H S N R C S Y I D L L N T V I C V S C K H N T R G Q H C E L C R L G Y F R N A S 450

451 A Q L D D E N V C I E C Y C N P L G S I H D R C N G S G F C E C K T G T T G P K C D E C L P G N S W 500
   |||||||
451 A Q L D D E N V C I E C Y C N P L G S I H D R C N G S G F C E C K T G T T G P K C D E C L P G N S W 500

501 H Y G C Q P N V C D N E L L H C Q N G G T C H N N V R C L C P A A Y T G I L C E K L R C E E A G S C 550
   |||||||
501 H Y G C Q P N V C D N E L L H C Q N G G T C H N N V R C L C P A A Y T G I L C E K L R C E E A G S C 550

551 G S D S G Q G A P P H G S P A L L L L T T L L G T A S P L V F 581
   |||||||
551 G S D S G Q G A P P H G S P A L L L L T T L L G T A S P L V F 581

```

```

#-----
#-----

```

**Cookies on EMBL-EBI website**

This website uses cookies to store a small amount of information on your computer, as part of the functioning of the site. Cookies used for the operation of the site have already been set.

To find out more about the cookies we use and how to delete them, see our [Cookie](#) and [Privacy](#) statements.

Dismiss this notice

# EMBOSS Stretcher

[Tools](#) > [Pairwise Sequence Alignment](#) > EMBOSS Stretcher

Results for job emboss\_stretcher-I20141228-081355-0938-85822166-pg

```
#####
# Program: stretcher
# Rundate: Sun 28 Dec 2014 08:13:57
# Commandline: stretcher
#   -auto
#   -stdout
#   -asequence emboss_stretcher-I20141228-081355-0938-85822166-pg.aupfile
#   -bsequence emboss_stretcher-I20141228-081355-0938-85822166-pg.bupfile
#   -datafile EBLOSUM62
#   -gapopen 12
#   -gapextend 2
#   -aformat3 pair
#   -sprotein1
#   -sprotein2
# Align_format: pair
# Report_file: stdout
#####
```

```
#-----
#
# Aligned_sequences: 2
# 1:
# 2:
# Matrix: EBLOSUM62
# Gap_penalty: 12
# Extend_penalty: 2
#
# Length: 581
# Identity:     528/581 (90.9%)
# Similarity:   528/581 (90.9%)
# Gaps:         0/581 (0.0%)
# Score: 2903
#
#-----
```

```
1 MYLSRFLSIHALWVTVSSVMQPYPLVWGHYDLCKTQIYTEEGKVWDYMAC      50
  |||||.....
1 MYLSRFLSIHALWVTVSSVMQPYPLVWGHYDLCKTQIYTEEXXXXXXXXXXX    50
```

|     |                                                       |     |
|-----|-------------------------------------------------------|-----|
| 51  | QPESTDMTKYLKVKLDPPDITCGDPPETFCAMGNPYMCNNECDASTPELA    | 100 |
|     | .....                                                 |     |
| 51  | XXXXXXXXXXXXXXXXKLDPPDITCGDPPETFCAMGNPYMCNNECDASTPELA | 100 |
| 101 | HPPELMFDFEGRHPSTFWQSATWKEYPKPLQVNI TLSWSKTIELTDNIVI   | 150 |
|     |                                                       |     |
| 101 | HPPELMFDFEGRHPSTFWQSATWKEYPKPLQVNI TLSWSKTIELTDNIVI   | 150 |
| 151 | TFESGRPDQMILEKSLDYGRTWQPYQYYATDCLDAFHMDPKSVKDLSQHT    | 200 |
|     |                                                       |     |
| 151 | TFESGRPDQMILEKSLDYGRTWQPYQYYATDCLDAFHMDPKSVKDLSQHT    | 200 |
| 201 | VLEI ICTEEYSTGYTTNSKIIHFEIKDRFAFFAGPRLRNMASLYGQDDT    | 250 |
|     | .....                                                 |     |
| 201 | VLEI ICTEEYSTGYTTNSKIIHFEIXXXXXXXXXXXXXXXXXMASLYGQDDT | 250 |
| 251 | KKLRDFFTVTDLRIRLLRPAVGEIFVDELHLARYFYAISDIKVRGRCKCN    | 300 |
|     |                                                       |     |
| 251 | KKLRDFFTVTDLRIRLLRPAVGEIFVDELHLARYFYAISDIKVRGRCKCN    | 300 |
| 301 | LHATVCVYDNSKLTCECEHNTTGPDCGCKKKNYQGRPWSPGSYLPIPKGT    | 350 |
|     | .                                                     |     |
| 301 | XHATVCVYDNSKLTCECEHNTTGPDCGCKKKNYQGRPWSPGSYLPIPKGT    | 350 |
| 351 | ANTCIPSISSIGNPPKFNRIWPNISSLEVSNPQVAPKLALSTVSSQVA      | 400 |
|     |                                                       |     |
| 351 | ANTCIPSISSIGNPPKFNRIWPNISSLEVSNPQVAPKLALSTVSSQVA      | 400 |
| 401 | NHKRDCECFGHSNRCSYIDLLNTVICVSKHNTRGQHCELCRLGYFRNAS     | 450 |
|     |                                                       |     |
| 401 | NHKRDCECFGHSNRCSYIDLLNTVICVSKHNTRGQHCELCRLGYFRNAS     | 450 |
| 451 | AQLDDENVCIECYCNPLGSIHDCRNGSGFCECKTGTGPKCDECLPGNSW     | 500 |
|     | .....                                                 |     |
| 451 | AQLDDENVCIECYCNPLGSIHDXXXXXXXXXXXXXXXXPKCDECLPGNSW    | 500 |
| 501 | HYGCQPNVCDNELLHCQNGGTCHNNVRCLCPAAYTGILCEKLRCEEAGSC    | 550 |
|     |                                                       |     |
| 501 | HYGCQPNVCDNELLHCQNGGTCHNNVRCLCPAAYTGILCEKLRCEEAGSC    | 550 |
| 551 | GSDSGQGAPPHGSPALLLTLLGTASPLVF                         | 581 |
|     |                                                       |     |
| 551 | GSDSGQGAPPHGSPALLLTLLGTASPLVF                         | 581 |

#-----  
#-----

Cookies on EMBL-EBI website

This website uses cookies to store a small amount of information on your computer, as part of the functioning of the site. Cookies used for the operation of the site have already been set.

To find out more about the cookies we use and how to delete them, see our [Cookie](#) and [Privacy](#) statements.

Dismiss this notice

# EMBOSS Stretcher

[Tools](#) > [Pairwise Sequence Alignment](#) > EMBOSS Stretcher

Results for job emboss\_stretcher-I20150104-090503-0441-51962716-es

```
#####
# Program: stretcher
# Rundate: Sun 4 Jan 2015 09:05:04
# Commandline: stretcher
# -auto
# -stdout
# -asequence emboss_stretcher-I20150104-090503-0441-51962716-es.aupfile
# -bsequence emboss_stretcher-I20150104-090503-0441-51962716-es.bupfile
# -datafile EBLOSUM62
# -gapopen 12
# -gapextend 2
# -aformat3 pair
# -sprotein1
# -sprotein2
# Align_format: pair
# Report_file: stdout
#####
```

```
#=====
#
# Aligned_sequences: 2
# 1:
# 2:
# Matrix: EBLOSUM62
# Gap_penalty: 12
# Extend_penalty: 2
#
# Length: 605
# Identity: 269/605 (44.5%)
# Similarity: 271/605 (44.8%)
# Gaps: 24/605 ( 4.0%)
# Score: 1199
#
#=====
```

|   |                                                      |    |
|---|------------------------------------------------------|----|
| 1 | MYLSRFLSIHALWVTVSSVMQPYPLVWGHYDLCKTQIYTEEGKVWDYMAC   | 50 |
|   | .....                                                |    |
| 1 | MYLSRFLSIHALWVTVSSVMQXXXXXXXXXXXXXXXXXXXXXXXXXXXXMAC | 50 |



Cookies on EMBL-EBI website

This website uses cookies to store a small amount of information on your computer, as part of the functioning of the site. Cookies used for the operation of the site have already been set.

To find out more about the cookies we use and how to delete them, see our [Cookie](#) and [Privacy](#) statements.

Dismiss this notice

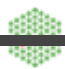

# EMBOSS Stretcher

[Tools](#) > [Pairwise Sequence Alignment](#) > EMBOSS Stretcher

Results for job emboss\_stretcher-I20150104-094928-0383-66289948-pg

```
#####
# Program: stretcher
# Rundate: Sun 4 Jan 2015 09:49:29
# Commandline: stretcher
# -auto
# -stdout
# -asequence emboss_stretcher-I20150104-094928-0383-66289948-pg.aupfile
# -bsequence emboss_stretcher-I20150104-094928-0383-66289948-pg.bupfile
# -datafile EBLOSUM62
# -gapopen 12
# -gapextend 2
# -aformat3 pair
# -sprotein1
# -sprotein2
# Align_format: pair
# Report_file: stdout
#####
```

```
#=====
#
# Aligned_sequences: 2
# 1:
# 2:
# Matrix: EBLOSUM62
# Gap_penalty: 12
# Extend_penalty: 2
#
# Length: 581
# Identity: 146/581 (25.1%)
# Similarity: 146/581 (25.1%)
# Gaps: 0/581 (0.0%)
# Score: 397
#
#=====
```

|   |                                                         |    |
|---|---------------------------------------------------------|----|
| 1 | MYLSRFLSIHALWVTVSSVMQPYPLVWGHYDLCKTQIYTEEGKVWDYMAC      | 50 |
|   | .....                                                   |    |
| 1 | XXXXXXXXXXXXXXXXXXXXXXXXXXXXXXXXXXXXXXXXXXXXXXXXXXXXMAC | 50 |



```

51 QPESTDMTKYLKVKLDPPDITCGDPPETFCAMGNPYMCNNECDASTPELA 100
   |||||||||||||.....
51 QPESTDMTKYLKVKXXXXXXXXXXXXXXXXXXXXXXXXXXXXXXXXXXXXX 100

101 HPPELMFDFEGRHPSTFWQSATWKEYPKPLQVNIITLSWSKTIELTDNIVI 150
   .....
101 XXXXXXXXXXXXXXXXXXXXXXXXXXXXXXXXXXXXXXXXXXXXXXXXXXXXX 150

151 TFESGRPDQMIKESLDYGRWQPYQYYATDCLDAFHMDPKSVKDLQHT 200
   |||||||||||||.....
151 TFESGRPDQMIKESLDYXXXXXXXXXXXXXXXXXXXXXXXXXXXXXXXXXXXX 200

201 VLEICTEEYSTGYTTNSKIIHFEEKDRFAFFAGPRLRNMASLYGQDFT 250
   .....
201 XXXXXXXXXXXXXXXXXXXXXXXXXXXXXXXXXXXXXXXXXXXXXXXXXXXXX 250

251 KKLRFDFTVTDLRIRLLRPAVGEIFVDELHLARYFYAISDIKVRGRCKCN 300
   .....
251 XXXXXXXXXXXXXXXXXXXXXXXXXXXXXXXXXXXXXXXXXXXXXXXXXXXXX 300

301 LHATVCVVDNSKLTCECEHNTTGPDCGCKKKNYQGRPWSPGSYLPKPGT 350
   .....
301 XXXXXXXXXXXXXXXXXXXXXXXXXXXXXXXXXXXXXXXXXXXXXXXXXXXXX 350

351 ANTCIPSISISIGNPPKFNRIWPNISSLEVSNPKQVAPKLALSTVSSVQVA 400
   .....|
351 XXXXXXXXXXXXXXXXXXXXXXXXXXXXXXXXXXXXXXXXXXXXXXXXXXXXSVQVA 400

401 NHKRDCECFGHSNRCSYIDLLNTVICVSKHNTRGQHCELCRLGYFRNAS 450
   |||||.....|
401 NHKRXXXXXXXXXXXXXXXXXXXXNTVICVSKHNTRGQHCELCRLGYFRNAS 450

451 AQLDDENVCIECYCNPLGSIHDCRNGSGFCECKTGTGPKCDECLPGNSW 500
   |||||.....|
451 AQLDDENVCIXXXNPLGSIHDCRNGSGFCECKTGTGPKCDECXXXXXXX 500

501 HYGCPNVCDNELLHCQNGGTCHNNVRCLCPAAVTGILCEKLRCEEAGSC 550
   .....|
501 XXXXXXXXXXXXXXXXXXXXXXXCHNNVRCLCPAAVTGILCEKLRCEXXXXX 550

551 GSDSGQGAPPHGSPALLLTTLLGTASPLVF 581
   .....|
551 XXXXXXXXXXXXXSPALLLTTXXXXXXXXXX 581

```

```

#-----
#-----

```

Cookies on EMBL-EBI website

This website uses cookies to store a small amount of information on your computer, as part of the functioning of the site. Cookies used for the operation of the site have already been set.

To find out more about the cookies we use and how to delete them, see our [Cookie](#) and [Privacy](#) statements.

Dismiss this notice

# EMBOSS Stretcher

[Tools](#) > [Pairwise Sequence Alignment](#) > EMBOSS Stretcher

Results for job emboss\_stretcher-I20141030-073844-0608-52390525-es

```
#####
# Program: stretcher
# Rundate: Thu 30 Oct 2014 07:38:45
# Commandline: stretcher
#   -auto
#   -stdout
#   -asequence emboss_stretcher-I20141030-073844-0608-52390525-es.aupfile
#   -bsequence emboss_stretcher-I20141030-073844-0608-52390525-es.bupfile
#   -datafile EBLOSUM62
#   -gapopen 12
#   -gapextend 2
#   -aformat3 pair
#   -sprotein1
#   -sprotein2
# Align_format: pair
# Report_file: stdout
#####
```

```
#=====
#
# Aligned_sequences: 2
# 1:
# 2:
# Matrix: EBLOSUM62
# Gap_penalty: 12
# Extend_penalty: 2
#
# Length: 581
# Identity:      310/581 (53.4%)
# Similarity:    310/581 (53.4%)
# Gaps:          0/581 ( 0.0%)
# Score: 1492
#
#
#=====
```

```
1 MYLSRFLSIHALWVTVSSVMQPYPLVWGHYDLCKTQIYTEEGKVWDYMAC      50
.....
1 XXXXXXXXXXXXXXXXXXXXXXXXXXXXXXXXXXXXXXXXXXXXXXXXXXXXXXXX  50
```

|     |                                          |                                                              |                                            |              |                                  |                           |              |                          |                  |                  |
|-----|------------------------------------------|--------------------------------------------------------------|--------------------------------------------|--------------|----------------------------------|---------------------------|--------------|--------------------------|------------------|------------------|
| 51  | QPES                                     | DMTKYLKVKLDP                                                 | DITCGDPPETFC                               | AMGNPYMCNNE  | CDASTPELA                        | 100                       |              |                          |                  |                  |
|     |                                          | .....                                                        |                                            |              |                                  |                           |              |                          |                  |                  |
| 51  | XXXXXXXXXXXXXXXXXXXXXXXXXXXXXXXXXXXXXXXX | XXXXXXXXXXXXXXXXXXXXXXXXXXXXXXXXXXXXXXXXXXXXXXXXXXXXXXXXXXXX |                                            |              |                                  | 100                       |              |                          |                  |                  |
| 101 | HPPELM                                   | FD                                                           | FEGRHPSTFWQ                                | SATWKEYPKPLQ | VNITLSWSKTI                      | ELTDNIVI 150              |              |                          |                  |                  |
|     |                                          |                                                              | .....                                      |              |                                  | .....                     |              |                          |                  |                  |
| 101 | HPPELM                                   | FD                                                           | FEXXXXXTFWQ                                | SATWKEYPKPLQ | VNITLSXXXXXXXXXXXXXX             | XXXXXXXXXXXXXXI 150       |              |                          |                  |                  |
| 151 | TFES                                     | GRPDQ                                                        | MILEKSLDYG                                 | RTWQPYQYAT   | DCLDAFHMDPK                      | SVKDLSQHT 200             |              |                          |                  |                  |
|     |                                          |                                                              | .....                                      | .....        | .....                            |                           |              |                          |                  |                  |
| 151 | TFES                                     | GRPDQ                                                        | MILEKSXXXXXXXXXXXXXXXXXXXXXXXXXXXXXXXXXXXX |              |                                  | XXXXXXXXXXXXXXXXXXXX 200  |              |                          |                  |                  |
| 201 | VLEI                                     | ICTE                                                         | EYSTGYTTNS                                 | KIIHFEIKDR   | FAFFAGPRLR                       | NMASLYGOLDTT 250          |              |                          |                  |                  |
|     | .....                                    |                                                              |                                            | .....        |                                  |                           |              |                          |                  |                  |
| 201 | XXXXXXXX                                 | EYSTGYTTNS                                                   | KXXXXXXXXXXXX                              | XXXXXXXXXXXX | XXXXXXXXXXXX                     | XXXXXXXXXXXX              | XXXXXXXXXXXX | XXXXXXXXXXXX 250         |                  |                  |
| 251 | KKLR                                     | DFFTV                                                        | TDLRIRLLR                                  | PAVGEIFV     | DELHLARYFYA                      | ISDIKVRGR                 | CKCN 300     |                          |                  |                  |
|     |                                          |                                                              |                                            | .....        | .....                            | .....                     | .....        |                          |                  |                  |
| 251 | KKLR                                     | DFFTV                                                        | TDLRIRLLR                                  | PAVGEIFV     | DELHXXXXXXXXXXXXXXXXXXXXXXXXXXXX |                           |              | XXXXXXXXXXXXXXXXXXXX 300 |                  |                  |
| 301 | LHAT                                     | VCVYD                                                        | NSKLTCE                                    | CEHNTTGP     | DCGKCKK                          | NYQGRP                    | PWSPGS       | SYLPIPKGT 350            |                  |                  |
|     | .....                                    |                                                              |                                            |              |                                  | .....                     | .....        |                          |                  |                  |
| 301 | XXXX                                     | VCVYD                                                        | NSKLTCE                                    | CEHNTTGP     | DCGKCKK                          | NYQGRP                    | PWSPGS       | YXXXXXXXXXT 350          |                  |                  |
| 351 | ANTC                                     | IPSI                                                         | SSIGNPP                                    | KFNRIWP      | NISSLEV                          | SNPKQ                     | VAPKLAL      | STVSSVQVA 400            |                  |                  |
|     |                                          |                                                              |                                            |              | .....                            | .....                     | .....        |                          |                  |                  |
| 351 | ANTC                                     | IPSI                                                         | SSIGNPP                                    | KFNRIWP      | NISSLEV                          | SNPKQXXXXXXXXXXXXXXXXXXXX |              | XXXXXXXXXXXXXXXXXXXX 400 |                  |                  |
| 401 | NHKR                                     | DCECF                                                        | GHSNRCS                                    | YIDLLNT      | VICVSC                           | KHNTR                     | GQH          | CELCRLGYFRNAS 450        |                  |                  |
|     | .....                                    |                                                              | .....                                      |              |                                  |                           | .....        |                          |                  |                  |
| 401 | XXXX                                     | C                                                            | XXXXXXXXXXXXXXXXXXXX                       | XXXXXXXXXXXX | XXXXXXXXXXXX                     | XXXXXXXXXXXX              | XXXXXXXXXXXX | XXXXXXXXXXXX 450         |                  |                  |
| 451 | AQLD                                     | DENVCIE                                                      | CYCNPLG                                    | SIHDRC       | NGSGF                            | CECKT                     | GTT          | GP                       | KDCDECLPGNSW 500 |                  |
|     | .....                                    |                                                              | .....                                      |              |                                  |                           | .....        | .....                    |                  |                  |
| 451 | XXXX                                     | X                                                            | XXXXXXXXXX                                 | XXXXXXXXXX   | XXXXXXXXXX                       | XXXXXXXXXX                | XXXXXXXXXX   | XXXXXXXXXX 500           |                  |                  |
| 501 | HYGC                                     | QPNVCD                                                       | NELLHC                                     | QNGGT        | CHN                              | NV                        | RCLCP        | AAYTGILCE                | KLRCEEAGSC 550   |                  |
|     | ...                                      |                                                              |                                            |              |                                  | .....                     | .....        | .....                    | ..               |                  |
| 501 | XXX                                      | CQPNVCD                                                      | NELLHC                                     | QNGGT        | CHN                              | NV                        | RCLCP        | XXXXXXXX                 | XXXXXXXXL        | CEKLRCEEAGXX 550 |
| 551 | GSD                                      | SQG                                                          | APP                                        | HGSP         | ALLLL                            | TTL                       | LGT          | ASPLVF                   |                  | 581              |
|     | .....                                    |                                                              |                                            |              |                                  | .....                     | .....        |                          |                  |                  |
| 551 | XXXXXXXXXXXXXXXXXXXX                     | LLLLL                                                        | TTL                                        | LGT          | ASPLVF                           |                           |              |                          |                  | 581              |

#-----  
#-----

Cookies on EMBL-EBI website

This website uses cookies to store a small amount of information on your computer, as part of the functioning of the site. Cookies used for the operation of the site have already been set.

To find out more about the cookies we use and how to delete them, see our [Cookie](#) and [Privacy](#) statements.

Dismiss this notice

# EMBOSS Stretcher

[Tools](#) > [Pairwise Sequence Alignment](#) > EMBOSS Stretcher

Results for job emboss\_stretcher-I20141030-092317-0489-8765533-pg

```
#####
# Program: stretcher
# Rundate: Thu 30 Oct 2014 09:23:18
# Commandline: stretcher
# -auto
# -stdout
# -asequence emboss_stretcher-I20141030-092317-0489-8765533-pg.aupfile
# -bsequence emboss_stretcher-I20141030-092317-0489-8765533-pg.bupfile
# -datafile EBLOSUM62
# -gapopen 12
# -gapextend 2
# -aformat3 pair
# -sprotein1
# -sprotein2
# Align_format: pair
# Report_file: stdout
#####
```

```
#=====
#
# Aligned_sequences: 2
# 1:
# 2:
# Matrix: EBLOSUM62
# Gap_penalty: 12
# Extend_penalty: 2
#
# Length: 581
# Identity:      581/581 (100.0%)
# Similarity:    581/581 (100.0%)
# Gaps:          0/581 ( 0.0%)
# Score: 3253
#
#
#=====
```

```
1 MYLSRFLSIHALWVTVSSVMQPYPLVWGHYDLCKTQIYTEEGKVWDYMAC    50
| | | | | | | | | | | | | | | | | | | | | | | | | | | |
1 MYLSRFLSIHALWVTVSSVMQPYPLVWGHYDLCKTQIYTEEGKVWDYMAC    50
```

```

51 QPESTDMTKYLKVKLDPPDITCGDPPETF CAMGNPYMCNNECDASTPELA 100
  |||
51 QPESTDMTKYLKVKLDPPDITCGDPPETF CAMGNPYMCNNECDASTPELA 100

101 HPPELMFDFEGRHPSTFWQSATWKEYPKPLQVNI TLSWSKTIELTDNIVI 150
  |||
101 HPPELMFDFEGRHPSTFWQSATWKEYPKPLQVNI TLSWSKTIELTDNIVI 150

151 TFESGRPDQ MILEKSLDYGR TWQPYQYYATDCLDAFHMDPKSVKDL SQHT 200
  |||
151 TFESGRPDQ MILEKSLDYGR TWQPYQYYATDCLDAFHMDPKSVKDL SQHT 200

201 VLEI ICTEEYSTGYTTNSKIIHFEIKDRFAFFAGPRLRNMASLYGQLD TT 250
  |||
201 VLEI ICTEEYSTGYTTNSKIIHFEIKDRFAFFAGPRLRNMASLYGQLD TT 250

251 KKL RDFFTV TDLRIRLLRPAVGEI FVDELHLARYFYAISDIKVRGRCKCN 300
  |||
251 KKL RDFFTV TDLRIRLLRPAVGEI FVDELHLARYFYAISDIKVRGRCKCN 300

301 LHATVCVYD NSKLTCECEHNTTGPDCGKCKKNYQGRPWSPG SYLP I PKGT 350
  |||
301 LHATVCVYD NSKLTCECEHNTTGPDCGKCKKNYQGRPWSPG SYLP I PKGT 350

351 ANTCIPSISSIGNPPKFNR IWPNISSLEVS NPKQVAPKLALSTVSSVQVA 400
  |||
351 ANTCIPSISSIGNPPKFNR IWPNISSLEVS NPKQVAPKLALSTVSSVQVA 400

401 NHKR DCECFGHSNRCSYIDLLN TVICV SCKHNTRGQHCELCRLGYFRNAS 450
  |||
401 NHKR DCECFGHSNRCSYIDLLN TVICV SCKHNTRGQHCELCRLGYFRNAS 450

451 AQLDDENVCIECYCNPLGSIHDCRNGSGFCECKTGTTGPKCDECLPGNSW 500
  |||
451 AQLDDENVCIECYCNPLGSIHDCRNGSGFCECKTGTTGPKCDECLPGNSW 500

501 HYG CQPNVCDNELLHCQNGGTCHNNVRCLCPAAYTGILCEKLRCEEAGSC 550
  |||
501 HYG CQPNVCDNELLHCQNGGTCHNNVRCLCPAAYTGILCEKLRCEEAGSC 550

551 GSDSGQGAPPHGSPALLL LTLLGTASPLVF 581
  |||
551 GSDSGQGAPPHGSPALLL LTLLGTASPLVF 581

```

```

#-----
#-----

```

### Cookies on EMBL-EBI website

This website uses cookies to store a small amount of information on your computer, as part of the functioning of the site. Cookies used for the operation of the site have already been set.

To find out more about the cookies we use and how to delete them, see our [Cookie](#) and [Privacy](#) statements.

Dismiss this notice

# EMBOSS Stretcher

[Tools](#) > [Pairwise Sequence Alignment](#) > EMBOSS Stretcher

Results for job emboss\_stretcher-I20141030-091833-0819-59941084-pg

```
#####
# Program: stretcher
# Rundate: Thu 30 Oct 2014 09:18:34
# Commandline: stretcher
#   -auto
#   -stdout
#   -asequence emboss_stretcher-I20141030-091833-0819-59941084-pg.aupfile
#   -bsequence emboss_stretcher-I20141030-091833-0819-59941084-pg.bupfile
#   -datafile EBLOSUM62
#   -gapopen 12
#   -gapextend 2
#   -aformat3 pair
#   -sprtein1
#   -sprtein2
# Align_format: pair
# Report_file: stdout
#####
```

```
#=====
#
# Aligned_sequences: 2
# 1:
# 2:
# Matrix: EBLOSUM62
# Gap_penalty: 12
# Extend_penalty: 2
#
# Length: 581
# Identity: 581/581 (100.0%)
# Similarity: 581/581 (100.0%)
# Gaps: 0/581 ( 0.0%)
# Score: 3253
#
#
#=====
```

```
1 MYLSRFLSIHALWVTVSSVMQPYPLVWGHYDLCKTQIYTEEGKVWDYMAC 50
| | | | |
1 MYLSRFLSIHALWVTVSSVMQPYPLVWGHYDLCKTQIYTEEGKVWDYMAC 50
```

```

51 QPESTDMTKYLKVKLDPPDITCGDPPETFCAMGNPYMCNNECDASTPELA 100
| | | | |
51 QPESTDMTKYLKVKLDPPDITCGDPPETFCAMGNPYMCNNECDASTPELA 100

101 HPELMFDFEGRHPSTFWQSATWKEYPKPLQVNITLSWSKTIELTDNIVI 150
| | | | |
101 HPELMFDFEGRHPSTFWQSATWKEYPKPLQVNITLSWSKTIELTDNIVI 150

151 TFESGRPDQMIKSLDYGRTWQPYQYYATDCLDAFHMDPKSVKDLSQHT 200
| | | | |
151 TFESGRPDQMIKSLDYGRTWQPYQYYATDCLDAFHMDPKSVKDLSQHT 200

201 VLEI ICTEEYSTGYTTNSKIIHFEIKDRFAFFAGPRLRNMASLYGQD TT 250
| | | | |
201 VLEI ICTEEYSTGYTTNSKIIHFEIKDRFAFFAGPRLRNMASLYGQD TT 250

251 KKL R D F F T V T D L R I R L L R P A V G E I F V D E L H L A R Y F Y A I S D I K V R G R C K C N 300
| | | | |
251 KKL R D F F T V T D L R I R L L R P A V G E I F V D E L H L A R Y F Y A I S D I K V R G R C K C N 300

301 L H A T V C V Y D N S K L T C E C E H N T T G P D C G K C K N Y Q G R P W S P G S Y L P I P K G T 350
| | | | |
301 L H A T V C V Y D N S K L T C E C E H N T T G P D C G K C K N Y Q G R P W S P G S Y L P I P K G T 350

351 A N T C I P S I S S I G N P P K F N R I W P N I S S L E V S N P K Q V A P K L A L S T V S S V Q V A 400
| | | | |
351 A N T C I P S I S S I G N P P K F N R I W P N I S S L E V S N P K Q V A P K L A L S T V S S V Q V A 400

401 N H K R D C E C F G H S N R C S Y I D L L N T V I C V S C K H N T R G Q H C E L C R L G Y F R N A S 450
| | | | |
401 N H K R D C E C F G H S N R C S Y I D L L N T V I C V S C K H N T R G Q H C E L C R L G Y F R N A S 450

451 A Q L D D E N V C I E C Y C N P L G S I H D R C N G S G F C E C K T G T T G P K C D E C L P G N S W 500
| | | | |
451 A Q L D D E N V C I E C Y C N P L G S I H D R C N G S G F C E C K T G T T G P K C D E C L P G N S W 500

501 H Y G C Q P N V C D N E L L H C Q N G G T C H N N V R C L C P A A Y T G I L C E K L R C E E A G S C 550
| | | | |
501 H Y G C Q P N V C D N E L L H C Q N G G T C H N N V R C L C P A A Y T G I L C E K L R C E E A G S C 550

551 G S D S G Q G A P P H G S P A L L L L T T L L G T A S P L V F 581
| | | | |
551 G S D S G Q G A P P H G S P A L L L L T T L L G T A S P L V F 581
    
```

```

#-----
#-----
    
```





```

51 QPESTDMTKYLKVKLDPPDITCGDPPETF CAMGNPYMCNNECDASTPELA 100
   |||
51 QPESTDMTKYLKVKLDPPDITCGDPPETF CAMGNPYMCNNECDASTPELA 100

101 HPPELMFDFEGRHPSTFWQSATWKEYPKPLQVNITLSWSKTIELTDNIVI 150
   |||...|||
101 HPPELMFDFEGRHPSTFWQXXXXKEYPKPLQVNITLSWSKTIXXXXXVI 150

151 TFESGRPDQ MILEKSLDYGR TWQPYQYYATDCLDAFHMDPKSVKDL SQHT 200
   |||.....
151 TFESGRPDQ MILEKSLDYGR TWXXXXXXXXXXXXXXXXXXXXXXXXXXXX 200

201 VLEI ICTEEYSTGYTTNSKIIHFEIKDRFAFFAGPRLRNMASLYGQLDTT 250
   .....|...|
201 XXXXXXXXXXXXXXXXXXXXKIIHFEIKDRFAFXXXXXXXXXXLYGQLDTT 250

251 KKL R DFFTV TDLRIRLLRPAVGEIFVDELHLARYFYAISDIKVRGRCKCN 300
   |||...|||
251 KKL R DFFTV TDLRIRLLRPAVGEIFVDELHLARYFYAISDIKVRXXXXXX 300

301 LHATVCVYDNSKLTCECEHNTTGPDCGKCKKNYQGRP WSPG SYLP I PKGT 350
   .....|...|
301 XXXXXXXDNSKLTCECEHNTTXXXXXXXXXNYQGRP WSPG SYLP I PKGT 350

351 ANTCIPSISSIGNPPKFNR IWPNISSLEVSNPKQVAPKLALSTVSSVQVA 400
   .....|...|
351 XXXXXXXXXXXXXXXPPKFNRXXXXXXXXXXXXXXXXXXXXXXXXXXXX 400

401 NHKRDCECFGHSNRCSYIDLLNTVICVSKHNTRGQHCELCRLGYFRNAS 450
   .....|...|
401 XXXXXCECFGHSNRCSYIDLXXXXXXXXXXXXXXXXXXXXXXXXXXXX 450

451 AQLDDENVCIECYCNPLGSIHDCN GSGFCECKTGTGPKCDECLPGNSW 500
   .|...|
451 XQLDDENVCIECYCNPLGSIHDCN GSGXXXXXXXXXXXXXXXXXXXX 500

501 HYGCPNVCDNELLHCQNGGTCHNNVRCLCPAAYTGILCEKLRCEEAGSC 550
   .....|...|
501 XXXXXXXVCDNELLHCQNGXXXXXXXXXXXXXXXXXXXXXXXXXXXX 550

551 GSDSGQGAPPHGSPALLLTTLLGTASPLVF 581
   .....|...|
551 XXXXXXXXPHGSPALLLTTLLGTXXXXXF 581
    
```

```

#-----
#-----
    
```

Cookies on EMBL-EBI website

This website uses cookies to store a small amount of information on your computer, as part of the functioning of the site. Cookies used for the operation of the site have already been set.

To find out more about the cookies we use and how to delete them, see our [Cookie](#) and [Privacy](#) statements.

Dismiss this notice

# EMBOSS Stretcher

[Tools](#) > [Pairwise Sequence Alignment](#) > EMBOSS Stretcher

Results for job emboss\_stretcher-I20150113-102302-0252-16718505-pg

```
#####
# Program: stretcher
# Rundate: Tue 13 Jan 2015 10:23:04
# Commandline: stretcher
#   -auto
#   -stdout
#   -asequence emboss_stretcher-I20150113-102302-0252-16718505-pg.aupfile
#   -bsequence emboss_stretcher-I20150113-102302-0252-16718505-pg.bupfile
#   -datafile EBLOSUM62
#   -gapopen 12
#   -gapextend 2
#   -aformat3 pair
#   -sprotein1
#   -sprotein2
# Align_format: pair
# Report_file: stdout
#####
```

```
#=====
#
# Aligned_sequences: 2
# 1:
# 2:
# Matrix: EBLOSUM62
# Gap_penalty: 12
# Extend_penalty: 2
#
# Length: 581
# Identity:      580/581 (99.8%)
# Similarity:    581/581 (100.0%)
# Gaps:          0/581 ( 0.0%)
# Score: 3250
#
#=====
```

```
1 MYLSRFLSIHALWVTVSSVMQPYPLVWGHYDLCKTQIYTEEGKVWDYMAC 50
  |||
1 MYLSRFLSIHALWVTVSSVMQPYPLVWGHYDLCKTQIYTEEGKVWDYMAC 50
```

```

51 QPESTDMTKYLKVKLDPPDITCGDPPETF CAMGNPYMCNNECDASTPELA 100
   |||
51 QPESTDMTKYLKVKLDPPDITCGDPPETF CSMGNPYMCNNECDASTPELA 100
   |||

101 HPPELMFDFEGRHPSTFWQSATWKEYPKPLQVNI TLSWSKTIELTDNIVI 150
   |||
101 HPPELMFDFEGRHPSTFWQSATWKEYPKPLQVNI TLSWSKTIELTDNIVI 150
   |||

151 TFESGRPDQ MILEKSLDYGR TWQPYQYYATDCLDAFHMDPKSVKDL SQHT 200
   |||
151 TFESGRPDQ MILEKSLDYGR TWQPYQYYATDCLDAFHMDPKSVKDL SQHT 200
   |||

201 VLEI ICTEEYSTGYTTNSKIIHF EIKDRFAFFAGPRLRN MASLYGQ LDTT 250
   |||
201 VLEI ICTEEYSTGYTTNSKIIHF EIKDRFAFFAGPRLRN MASLYGQ LDTT 250
   |||

251 KKL R DFFTV TDLRIRLLRPAVGEIFVDELHLARYFYAISDIKVRGRCKCN 300
   |||
251 KKL R DFFTV TDLRIRLLRPAVGEIFVDELHLARYFYAISDIKVRGRCKCN 300
   |||

301 LHATVCVYDNSKLTCECEHNTTGPDCGCKKKNYQGRPWSPGSYLP I PKGT 350
   |||
301 LHATVCVYDNSKLTCECEHNTTGPDCGCKKKNYQGRPWSPGSYLP I PKGT 350
   |||

351 ANTCIPSISSIGNPPKFNR IWPNISSLEVSNPKQVAPKLALSTVSSVQVA 400
   |||
351 ANTCIPSISSIGNPPKFNR IWPNISSLEVSNPKQVAPKLALSTVSSVQVA 400
   |||

401 NHKRDCECFGHSNRCSYIDLLNTVICVSKHNTRGQHCELCRLGYFRNAS 450
   |||
401 NHKRDCECFGHSNRCSYIDLLNTVICVSKHNTRGQHCELCRLGYFRNAS 450
   |||

451 AQLDDENVCIECYCNPLGSIHDCN GSGFCECKTGTGPKCDECLPGNSW 500
   |||
451 AQLDDENVCIECYCNPLGSIHDCN GSGFCECKTGTGPKCDECLPGNSW 500
   |||

501 HYGCPNVCDNELLHCQNGGTCHNNVRCLCPAA YTGILCEKLRCEEAGSC 550
   |||
501 HYGCPNVCDNELLHCQNGGTCHNNVRCLCPAA YTGILCEKLRCEEAGSC 550
   |||

551 GSDSGQGAPPHGSPALLLLTLLGTASPLVF 581
   |||
551 GSDSGQGAPPHGSPALLLLTLLGTASPLVF 581
   |||

```

```

#-----
#-----

```



```

51 QPESTDMTKYLKVKLDPPDITCGDPPETF CAMGNPYMCNNECDASTPELA 100
   |||
51 QPESTDMTKYLKVKLDPPDITCGDPPETF CAMGNPYMCNNECDASTPELA 100

101 HPPELMFDFEGRHPSTFWQSATWKEYPKPLQVNITLSWSKTIELTDNIVI 150
   |||
101 HPPELMFDFEGRHPSTFWQSATWKEYPKPLQVNITLSWSKTIELTDNIVI 150

151 TFESGRPDQ MILEKSLDYGR TWQPYQYYATDCLDAFHMDPKSVKDL SQHT 200
   |||
151 TFESGRPDQ MILEKSLDYGR TWQPYQYYATDCLDAFHMDPKSVKDL SQHT 200

201 VLEI ICTEEYSTGYTTNSKIIHFEIKDRFAFFAGPRLRNMASLYGQ LDTT 250
   |||
201 VLEI ICTEEYSTGYTTNSKIIHFEIKDRFAFFAGPRLRNMASLYGQ LDTT 250

251 KKL R D F F T V T D L R I R L L R P A V G E I F V D E L H L A R Y F Y A I S D I K V R G R C K C N 300
   |||
251 KKL R D F F T V T D L R I R L L R P A V G E I F V D E L H L A R Y F Y A I S D I K V R G R C K C N 300

301 L H A T V C V Y D N S K L T C E C E H N T T G P D C G K C K N Y Q G R P W S P G S Y L P I P K G T 350
   |||
301 L H A T V C V Y D N S K L T C E C E H N T T G P D C G K C K N Y Q G R P W S P G S Y L P I P K G T 350

351 A N T C I P S I S S I G N P P K F N R I W P N I S S L E V S N P K Q V A P K L A L S T V S S V Q V A 400
   |||
351 A N T C I P S I S S I G N P P K F N R I W P N I S S L E V S N P K Q V A P K L A L S T V S S V Q V A 400

401 N H K R D C E C F G H S N R C S Y I D L L N T V I C V S C K H N T R G Q H C E L C R L G Y F R N A S 450
   |||
401 N H K R D C E C F G H S N R C S Y I D L L N T V I C V S C K H N T R G Q H C E L C R L G Y F R N A S 450

451 A Q L D D E N V C I E C Y C N P L G S I H D R C N G S G F C E C K T G T T G P K C D E C L P G N S W 500
   |||
451 A Q L D D E N V C I E C Y C N P L G S I H D R C N G S G F C E C K T G T T G P K C D E C L P G N S W 500

501 H Y G C Q P N V C D N E L L H C Q N G G T C H N N V R C L C P A A Y T G I L C E K L R C E E A G S C 550
   |||
501 H Y G C Q P N V C D N E L L H C Q N G G T C H N N V R C L C P A A Y T G I L C E K L R C E E A G S C 550

551 G S D S G Q G A P P H G S P A L L L L T T L L G T A S P L V F 581
   ||. |||
551 G S G S G Q G A P P H G S R T L L L L T T L L G T A S P L V F 581

```

```

#-----
#-----

```

Cookies on EMBL-EBI website

This website uses cookies to store a small amount of information on your computer, as part of the functioning of the site. Cookies used for the operation of the site have already been set.

To find out more about the cookies we use and how to delete them, see our [Cookie](#) and [Privacy](#) statements.

Dismiss this notice

# EMBOSS Stretcher

[Tools](#) > [Pairwise Sequence Alignment](#) > EMBOSS Stretcher

Results for job emboss\_stretcher-I20141029-100408-0544-53291024-es

```
#####
# Program: stretcher
# Rundate: Wed 29 Oct 2014 10:04:09
# Commandline: stretcher
# -auto
# -stdout
# -asequence emboss_stretcher-I20141029-100408-0544-53291024-es.asequence
# -bsequence emboss_stretcher-I20141029-100408-0544-53291024-es.bsequence
# -datafile EBLOSUM62
# -gapopen 12
# -gapextend 2
# -aformat3 pair
# -sprotein1
# -sprotein2
# Align_format: pair
# Report_file: stdout
#####

#=====
#
# Aligned_sequences: 2
# 1: EMBOSS_001
# 2: EMBOSS_001
# Matrix: EBLOSUM62
# Gap_penalty: 12
# Extend_penalty: 2
#
# Length: 581
# Identity:      561/581 (96.6%)
# Similarity:   568/581 (97.8%)
# Gaps:         0/581 ( 0.0%)
# Score: 3142
#
#=====

EMBOSS_001      1 MYLSRFLSIHALWVTVSSVMQPYPLVWGHYDLCKTQIYTEEGKVWDYMAC      50
                |||.....|:|:|.....|
EMBOSS_001      1 MYLSRFLSIHALWVTVSSVMQPYLFVWGHYDVCKSLIYTEEGKVWDYTAC      50
```



Netrin-G2



Cookies on EMBL-EBI website

This website uses cookies to store a small amount of information on your computer, as part of the functioning of the site. Cookies used for the operation of the site have already been set.

To find out more about the cookies we use and how to delete them, see our [Cookie](#) and [Privacy](#) statements.

Dismiss this notice

# EMBOSS Stretcher

[Tools](#) > [Pairwise Sequence Alignment](#) > EMBOSS Stretcher

Results for job emboss\_stretcher-I20141228-072756-0547-67091880-es

```
#####
# Program: stretcher
# Rundate: Sun 28 Dec 2014 07:27:57
# Commandline: stretcher
# -auto
# -stdout
# -asequence emboss_stretcher-I20141228-072756-0547-67091880-es.aupfile
# -bsequence emboss_stretcher-I20141228-072756-0547-67091880-es.bupfile
# -datafile EBLOSUM62
# -gapopen 12
# -gapextend 2
# -aformat3 pair
# -sprotein1
# -sprotein2
# Align_format: pair
# Report_file: stdout
#####
```

```
#=====
#
# Aligned_sequences: 2
# 1:
# 2:
# Matrix: EBLOSUM62
# Gap_penalty: 12
# Extend_penalty: 2
#
# Length: 587
# Identity: 580/587 (98.8%)
# Similarity: 581/587 (99.0%)
# Gaps: 0/587 ( 0.0%)
# Score: 3243
#
#=====
```

```
1 MLHLLALFLHCLPLASGDYDICKSWVTTDEGPTWEFYACQPKVMRLKDYV 50
  |||
1 MLHLLALFLHCLPLASGDYDICKSWVTTDEGPTWEFYACQPKVMRLKDYV 50
```

```

51 KVKVEPSGITCGDPPERFCSHENPYLCSNECDASNPDLAHPRLMFDKEE 100
   |||
51 KVKVEPSGITCGDPPERFCSHENPYLCSNECDASNPDLAHPRLMFDKEE 100

101 EGLATYWQSITWSRYPSPLEANITLSWNKTVELTDDVVMTFEYGRPTVMV 150
   |||
101 EGLATYWQSITWSRYPSPLEANITLSWNKTVELTDDVVMTFEYGRPTVMV 150

151 LEKSLDNGRTWQPYQFYAEDCMEAFGMSARRARDMSSSSAHRVLCTEEYS 200
   |||
151 LEKSLDNGRTWQPYQFYAEDCMEAFGMSARRARDMSSSSAHRVLCTEEYS 200

201 RWAGSKKEKHVRFEVRDRFAIFAGPDLRNMDNLYTRLESAKGLKEFFTTLT 250
   |||
201 RWAGSKKEKHVRFEVRDRFAIFAGPDLRNMDNLYTRLESAKGLKEFFTTLT 250

251 DLRMRLLRPALGGTYVQRENLYKYFYAISNIEVIGRCKCNLHANLCSMRE 300
   |||
251 DLRMRLLRPALGGTYVQRENLYKYFYAISNIEVIGRCKCNLXANLCSMRE 300

301 GSLQCEEHNTTGPDCGKCKKNFRTRSWRAGSYLPLPHGSPNACATAGSF 350
   |||
301 GSLQCEEHNTTGPDCGKCKKNFRTRSWRAGSYLPLPHGSPNACAAAGSF 350

351 GKWTRPSTAAPLSSRWSQVASRAEAVGTPAAAPAPAKGYKLFQLKPKSPQ 400
   |: |||
351 GRWTRPSTAAPLSSRWSQVASRAEGVTPAAAPAPAKGYKLFQLKPKSPQ 400

401 VMPIEEFQDCECYGHSNRCSYIDFLNVVTCVSCKHNTRGQHCQHCLGYY 450
   |||
401 VMPIEEFQDCECYGHSNRCSYIDFLNVVTCVSCKHNTRGQHCQHCLGYY 450

451 RNSAELDDENVCIECNCNQIGSVHDCNETGFCECREGAAGPKDDCLP 500
   |||
451 RNSAELDDENVCIGCNCNQIGSVHDCNETGFCECREGAAGPKDDCLP 500

501 THYWRQGCYPNVCDLQNGGTCLQNRACPRGYTGVRCEQPRCDP 550
   |||
501 THYWRQGCYRNVCDLQNGGTCLQNRACPRGYTGVRCEQPRCDP 550

551 ADDDGGLDCDRAPGAAPRPATLLGCLLLLGLAARLGR 587
   |||
551 ADDDGGLDCDRAPGAAPRPATLLGCLLLLGLAARLGR 587

```

```

#-----
#-----

```



```

51 KVKVEPSGITCGDPPERFCSHENPYLCSNECDASNPDLAHPRLMFDKEE 100
   |||
51 KVKVEPSGITCGDPPERFCSHENPYLCSNECDASNPDLAHPRLMFDKEE 100

101 EGLATYWQSITWSRYPSPLEANITLSWNKTVELTDDVVMTFEYGRPTVMV 150
   |||
101 EGLATYWQSITWSRYPSPLEANITLSWNKTVELTDDVVMTFEYGRPTVMV 150

151 LEKSLDNGRTWQPYQFYAEDCMEAFGMSARRARDMSSSSAHRVLCTEEYS 200
   |||. . . . . |||. . . . . |||
151 LEKSLXXXXTWQPYQFYAEDCMEXXXXXXXXXXDMSSSSAHRVLCTEEYS 200

201 RWAGSKKEKHVRFVDRFAIFAGPDLRNDNLYTRLESAKGLKEFFTTLT 250
   |||
201 RWAGSKKEKHVRFVDRFAIFAGPDLRNDNLYTRLESAKGLKEFFTTLT 250

251 DLRMRLLRPALGGTYVQRENLYKYFYAISNIEVIGRCKCNLHANLCSMRE 300
   |||
251 DLRMRLLRPALGGTYVQRENLYKYFYAISNIEVIGRCKCNLHANLCSMRE 300

301 GSLQCEEHNTTGPDCGKCKKNFRTRSWRAGSYLPLPHGSPNACATAGSF 350
   |||. . . . . |||
301 GSLQCEEXXTTGPDCGKCKKNFRTRSWRAGSYLPLPHGSPNACATAGSF 350

351 GWTRPSTAAPLSSRWSQVASRAEAVGTPAAAPAPAKGYKLFQLKPKSPQ 400
   |||. . . . . |||. . . . . |||
351 GWXXXXXXXXXXXXRWSQVASRAEAVGTPAXAPAPAKGYKLFQLKPKSPQ 400

401 VMPIEEFQDCECYGHSNRCYSIDFLNVVTCVSKHNTRGQHCHRLGYY 450
   |||. . . . . |||
401 VMPIEEFQDCECYGHSNRCYSIDFLNVVTCVSKHNTRGQXXXHCHRLGYY 450

451 RNSAELDDENVCIECNCNQIGSVHRCNETGFCECREGAAGPKCDDCLP 500
   |||
451 RNSAELDDENVCIECNCNQIGSVHRCNETGFCECREGAAGPKCDDCLP 500

501 THYWRQGCYPNVCDDQLLQNGGTCLQNRACACPRGYTGVRCEQPRCDP 550
   |||. . . . . |||. . . . . |||. . . . . |||
501 THYXXQGCYPNVCDDQLLQNGGTCLQNXACACPRGYTGVRCEQXXXXP 550

551 ADDDGGLDCDRAPGAAPRATLLGCLLLLGLAARLGR 587
   |||. . . . . |||
551 ADDDGGLDCXXXXXXXXXXXXXXXXXXXXXXXXXXXX 587
    
```

```

#-----
#-----
    
```

## Cookies on EMBL-EBI website

This website uses cookies to store a small amount of information on your computer, as part of the functioning of the site. Cookies used for the operation of the site have already been set.

To find out more about the cookies we use and how to delete them, see our [Cookie](#) and [Privacy](#) statements.

Dismiss this notice

# EMBOSS Stretcher

[Tools](#) > [Pairwise Sequence Alignment](#) > EMBOSS Stretcher

Results for job emboss\_stretcher-I20150104-084150-0835-90231466-pg

```
#####
# Program: stretcher
# Rundate: Sun 4 Jan 2015 08:41:51
# Commandline: stretcher
# -auto
# -stdout
# -asequence emboss_stretcher-I20150104-084150-0835-90231466-pg.aupfile
# -bsequence emboss_stretcher-I20150104-084150-0835-90231466-pg.bupfile
# -datafile EBLOSUM62
# -gapopen 12
# -gapextend 2
# -aformat3 pair
# -sprotein1
# -sprotein2
# Align_format: pair
# Report_file: stdout
#####
```

```
#=====
#
# Aligned_sequences: 2
# 1:
# 2:
# Matrix: EBLOSUM62
# Gap_penalty: 12
# Extend_penalty: 2
#
# Length: 587
# Identity:      563/587 (95.9%)
# Similarity:    563/587 (95.9%)
# Gaps:          0/587 ( 0.0%)
# Score: 3129
#
#=====
```

```
1 MLHLLALFLHCLPLASGDYDICKSWVTTDEGPTWEFYACQPKVMRLKDYV 50
  |||
1 MLHLLALFLHCLPLASGDYDICKSWVTTDEGPTWEFYACQPKVMRLKDYV 50
```



Cookies on EMBL-EBI website

This website uses cookies to store a small amount of information on your computer, as part of the functioning of the site. Cookies used for the operation of the site have already been set.

To find out more about the cookies we use and how to delete them, see our [Cookie](#) and [Privacy](#) statements.

Dismiss this notice

# EMBOSS Stretcher

[Tools](#) > [Pairwise Sequence Alignment](#) > EMBOSS Stretcher

Results for job emboss\_stretcher-I20141228-084603-0980-30825109-oy

```
#####
# Program: stretcher
# Rundate: Sun 28 Dec 2014 08:46:05
# Commandline: stretcher
# -auto
# -stdout
# -asequence emboss_stretcher-I20141228-084603-0980-30825109-oy.aupfile
# -bsequence emboss_stretcher-I20141228-084603-0980-30825109-oy.bupfile
# -datafile EBLOSUM62
# -gapopen 12
# -gapextend 2
# -aformat3 pair
# -sprotein1
# -sprotein2
# Align_format: pair
# Report_file: stdout
#####
```

```
#=====
#
# Aligned_sequences: 2
# 1:
# 2:
# Matrix: EBLOSUM62
# Gap_penalty: 12
# Extend_penalty: 2
#
# Length: 587
# Identity: 456/587 (77.7%)
# Similarity: 456/587 (77.7%)
# Gaps: 0/587 ( 0.0%)
# Score: 2427
#
#=====
```

```
1 MLHLLALFLHCLPLASGDYDICKSWVTTDEGPTWEFYACQPKVMRLKDYV 50
  |||...|||
1 MLHLLALFLHCLPLASGDYDICKSWXXXXXXXXXWEFYACQPKVMRLKDYV 50
```







```

51 KVKVEPSGITCGDPPERFCSHENPYLCSNECDASNPDLAHPRLMFDKEE      100
   .....|.||.|.||. ....|||
51 XXXXXXXXXXXXXXXXXXXXXXXXXXXXXXXXXXXXXXXXSPDXAXPPXXXXKEE      100

101 EGLATYWQSITWSRYPSPLEANITLSWNKTVELTDDVMTFFEYGRPTVMV      150
   |.....
101 EXXXXXXXXXXXXXXXXXXXXXXXXXXXXXXXXXXXXXXXXXXXXXXXXXXXXXXXXX      150

151 LEKSLDNGRTWQPYQFYAEDCMEAFGMSARRARDMSSSSAHRVLCTEEYS      200
   .....| ||| ||| ||| ||| ||| ||| ||| ||| ||| ||| |.
151 XXXXXXXXXXXXXXXXXXXXXXXXXXXXXXXXMSARRARDMSSSSAHRVLCTEEYL      200

201 RWAGSKKEKHVRFVDRDFAI FAGPDLRNMDNLYTRLESAKGLKEFFTLT      250
   . ||| ||| |. ||| ||| ||| ||| ||| ||| ||| ||| |. | | .....
201 CWAGSKKEXHVRFEVDRDFAI FAGPDXRMDXXXXXXXXXXXXXXXXXXXXX      250

251 DLRMRLLRPALGGTYVQRENLYKYFYAISNIEVIGRCKCNLHANLCSMRE      300
   .....| ||| ||| ||| ||| ||| ||| ||| ||| ||| |... ||| ||| |||
251 XXXXXXXXXXXXXXXXXXXXXXXXKYFYAISNIEVIGRCKCXXXANLCSMRE      300

301 GSLQCEEHNTTGPDCGKCKNFRTRSWRAGSYLPLPHGSPNACATAGSF      350
   ||| ||| ||| .....| ||| ||| ||| ||| ||| ||| ||| .....
301 GSLQCEEHXXXXXXXXXXXXXXXXXXXXXRSWRAGSYLPLPHGSPNAXXXXXX      350

351 GKWTRPSTAAPLSSRWSQVASRAEAVGTPAAAPAPAKGYKLFQLKPKSPQ      400
   .....| | .....| |
351 XXXXXXXXXXXXXXXXXXXXXXXXVGTXXXXXXXXXXXXXXXXXXXXXSPQ      400

401 VMPIEEFQDCECYGHSNRCSYIDFLNVVTCVSCKHNTRGQHCQHCLGYY      450
   ||| ||| | .....
401 VMPIEEFQXXXXXXXXXXXXXXXXXXXXXXXXXXXXXXXXXXXXXXXXXXXXX      450

451 RNSAELDDENVNCIECNCNQIGSVHDCNETGFCECREGAAGPKCDDCLP      500
   ||| ||| ||| ||| ||| ||| ||| ||| ||| .....| ||| ||| ||| ||| ||| |||
451 RNSAELDDENVNCIECNCNQIGSVHXXXNETGFCECREGAAGPKCDDCLP      500

501 THYWRQGCYPNVCDLQNGGTCLQNCRCACPRGYTGVRCEQPRCDP      550
   ||| .....| | .....| | ..
501 THYXXXXXXXXXXXXXXXXXXXXXTCXXNXXXXXXXXXXXXXEQXX-XX      549

551 ADDDGLDCDRAPGAAPRATLLGCLLLLGLAARLGR      587
   .....
550 XXXXXXXXXXXXXXXXXXXXXXXXXXXXXXXXXXXXXXXX      586

```

```

#-----
#-----

```

Cookies on EMBL-EBI website

This website uses cookies to store a small amount of information on your computer, as part of the functioning of the site. Cookies used for the operation of the site have already been set.

To find out more about the cookies we use and how to delete them, see our [Cookie](#) and [Privacy](#) statements.

Dismiss this notice

# EMBOSS Stretcher

[Tools](#) > [Pairwise Sequence Alignment](#) > EMBOSS Stretcher

Results for job emboss\_stretcher-I20150104-100207-0478-58526928-pg

```
#####
# Program: stretcher
# Rundate: Sun 4 Jan 2015 10:02:08
# Commandline: stretcher
# -auto
# -stdout
# -asequence emboss_stretcher-I20150104-100207-0478-58526928-pg.aupfile
# -bsequence emboss_stretcher-I20150104-100207-0478-58526928-pg.bupfile
# -datafile EBLOSUM62
# -gapopen 12
# -gapextend 2
# -aformat3 pair
# -sprotein1
# -sprotein2
# Align_format: pair
# Report_file: stdout
#####
```

```
#=====
#
# Aligned_sequences: 2
# 1:
# 2:
# Matrix: EBLOSUM62
# Gap_penalty: 12
# Extend_penalty: 2
#
# Length: 587
# Identity: 124/587 (21.1%)
# Similarity: 124/587 (21.1%)
# Gaps: 0/587 ( 0.0%)
# Score: 270
#
#=====
```

```
1 MLHLLALFLHCLPLASGDYDICKSWVTTDEGPTWEFYACQPKVMRLKDYV 50
.....
1 XXXXXXXXXXXXXXXXXXXXXXXXXXXXXXXXXXXXXXXXXXXXXXXXXXXXXXX 50
```

```

51 KVKVEPSGITCGDPPERFCSHENPYLCSNECDASNPDLAHPRLMFDKEE 100
   .....
51 XXXXXXXXXXXXXXXXXXXXXXXXXXXXXXXXXXXXXXXXXXXXXXXXXXXX 100

101 EGLATYWQSITWSRYPSPLEANITLSWNKTVELTDDVVMTFEYGRPTVMV 150
   .....
101 XXXXXXXXXXXXXXXXXXXXXXXXXXXXXXXXXXXXXXXXXXXXXXXXXXXX 150

151 LEKSLDNGRTWQPYQFYAEDCMEAFGMSARRARDMSSSSAHRVLCTEEYS 200
   ..... |||||
151 XXXXXXXXXXXXXXXXXXXXXXXXXXXXXXXXXXXXXXXXXXXXARDMSSSSAHRVLCTEEYS 200

201 RWAGSKKEKHVRFEVRDRFAIFAGPDLRNMDNLYTRLESAKGLKEFFTLT 250
   ||||| .....
201 RWAGSKKEKHVRFEVRDRFAIFAGPDLRNMDNLXXXXXXXXXXXXXXXXXX 250

251 DLRMRLLRPALGGTYVQRENLYKYFYAISNIEVIGRCKCNLHANLCSMRE 300
   .....
251 XXXXXXXXXXXXXXXXXXXXXXXXXXXXXXXXXXXXXXXXXXXXXXXXXXXX 300

301 GSLQCEEHNTTGPDCGKCKKNFRTRS WRAGSYLPLPHGSPNACATAGSF 350
   .....
301 XXXXXXXXXXXXXXXXXXXXXXXXXXXXXXXXXXXXXXXXXXXXXXXXXXXX 350

351 GWTRPSTAAPLSSRWSQVASRAEAVGTPAAAPAPAKGYKLFQLKPKSPQ 400
   ..... |||
351 XXXXXXXXXXXXXXXXXXXXXXXXXXXXXXXXXXXXXXXXXXXXXXXXXXXXKSPQ 400

401 VMPIEEFQDCECYGHSNRCSYIDFLNVVTCVSKHNTRGQHCQHCR LGYY 450
   ||||| ..... |||||
401 VMPIEEFQXXXXXXXXXXXXXXXXXXXXXXXXXXXXXXXXXXTRGQHCQHCR LGYX 450

451 RNGSAELDDENVCIECNCNQIGSVHDCRNETGFCECREGAAGPKCDDCLP 500
   ..... ||||| ..... |||||
451 XXXXXXXXXXXXXXXCNCNQIGSVXXXXXXXXXXXXXXXXXXXXXXXXXDDCLP 500

501 THYWRQGCYPNVCDLQNGGTCLQNRACACPRGYTGVRCEQPRCDP 550
   ||||| ..... ||||| ..... |. |||||
501 THYWRQGCYXXXXXDQLLCQNGGTCLXXXXXXXXXXVVRCEQPRCXP 550

551 ADDDGGLDCDRAPGAAPRPATLLGCLLLLGLAARLGR 587
   .|| .....
551 XDDXXXXXXXXXXXXXXXXXXXXXXXXXXXXXXXXXXXXXXXXX 587
    
```

```

#-----
#-----
    
```

Cookies on EMBL-EBI website

This website uses cookies to store a small amount of information on your computer, as part of the functioning of the site. Cookies used for the operation of the site have already been set.

To find out more about the cookies we use and how to delete them, see our [Cookie](#) and [Privacy](#) statements.

Dismiss this notice

# EMBOSS Stretcher

[Tools](#) > [Pairwise Sequence Alignment](#) > EMBOSS Stretcher

Results for job emboss\_stretcher-I20141030-071213-0791-57584196-es

```
#####
# Program: stretcher
# Rundate: Thu 30 Oct 2014 07:12:14
# Commandline: stretcher
# -auto
# -stdout
# -asequence emboss_stretcher-I20141030-071213-0791-57584196-es.aupfile
# -bsequence emboss_stretcher-I20141030-071213-0791-57584196-es.bupfile
# -datafile EBLOSUM62
# -gapopen 12
# -gapextend 2
# -aformat3 pair
# -sprotein1
# -sprotein2
# Align_format: pair
# Report_file: stdout
#####
```

```
#=====
#
# Aligned_sequences: 2
# 1:
# 2:
# Matrix: EBLOSUM62
# Gap_penalty: 12
# Extend_penalty: 2
#
# Length: 587
# Identity: 264/587 (45.0%)
# Similarity: 266/587 (45.3%)
# Gaps: 0/587 ( 0.0%)
# Score: 1202
#
#
#=====
```

```
1 MLHLLALFLHCLPLASGDYDICKSWVTTDEGPTWEFYACQPKVMRLKDYV 50
   .....|:|||||||.....
1 XXXXXXLFLYCLPLASGDYDXXXXXXXXXXXXXXXXXXXXXXXXXXXXX 50
```





```

51 KVKVEPSGITCGDPPERFCSHENPYLCSNECDASNPDLAHPRLMFDKEE 100
   |||
51 KVKVEPSGITCGDPPERFCSHENPYLCSNECDASNPDLAHPRLMFDKEE 100

101 EGLATYWQSITWSRYPSPLEANITLSWNKTVELTDDVVMTFEYGRPTVMV 150
   |||
101 EGLATYWQSITWSRYPSPLEANITLSWNKTVELTDDVVMTFEYGRPTVMV 150

151 LEKSLDNGRTWQPYQFYAEDCMEAFGMSARRARDMSSSSAHRVLCTEEYS 200
   |||:
151 LEKSLDNGRTWQPYQFYAEDCMEAFGMSARQARDMSSSSAHRVLCTEEYS 200

201 RWAGSKKEKHVRFEVRDRFAIFAGPDLRNDNLYTRLESAKGLKEFFTLLT 250
   |||
201 RWAGSKKEKHVRFEVRDRFAIFAGPDLRNDNLYTRLESAKGLKEFFTLLT 250

251 DLRMRLLRPALGGTYVQRENLYKYFYAISNIEVIGRCKCNLHANLCSMRE 300
   |||
251 DLRMRLLRPALGGTYVQRENLYKYFYAISNIEVIGRCKCNLHANLCSMRE 300

301 GSLQCECEHNTTGPDCGKCKKNFRTRSWRAGSYLPLPHGSPNACATAGSF 350
   |||.
301 GSLQCECEHNTTGPDCGKCKKNFRTRSWRAGSYLPLPHGSPNACAAAGSF 350

351 GKWTRPSTAAPLSSRWSQVASRAEAVGTPAAAPAPAKGYKLFQLKPKSPQ 400
   |||
351 GKWTRPSTAAPLSSRWSQVASRAEAVGTPAAAPAPAKGYKLFQLKPKSPQ 400

401 VMPIEEFQDCECYGHSNRCSYIDFLNVVTCVSKHNTRGQHCQHCR LGYY 450
   |||
401 VMPIEEFQDCECYGHSNRCSYIDFLNVVTCVSKHNTRGQHCQHCR LGYY 450

451 RNSAELDDENVCIECNCNQIGSVHDCNETGFCECREGAAGPKCDDCLP 500
   |||
451 RNSAELDDENVCIECNCNQIGSVHDCNETGFCECREGAAGPKCDDCLP 500

501 THYWRQGCYPNVCDDDDQLLCQNGGTCLQNQRACACPRGYTGVRCEQPRCDP 550
   |||
501 THYWRQGCYPNVCDDDDQLLCQNGGTCLQNQRACACPRGYTGVRCEQPRCDP 550

551 ADDDGGLDCDRAPGAAPRPATLLGCLLLLGLAARLGR 587
   |||
551 ADDDGGLDCDRAPGAAPRPATLLGCLLLLGLAARLGR 587

```

```

#-----
#-----

```



Cookies on EMBL-EBI website

This website uses cookies to store a small amount of information on your computer, as part of the functioning of the site. Cookies used for the operation of the site have already been set.

To find out more about the cookies we use and how to delete them, see our [Cookie](#) and [Privacy](#) statements.

Dismiss this notice

# EMBOSS Stretcher

[Tools](#) > [Pairwise Sequence Alignment](#) > EMBOSS Stretcher

Results for job emboss\_stretcher-I20141029-101340-0856-98043844-es

```
#####
# Program: stretcher
# Rundate: Wed 29 Oct 2014 10:13:41
# Commandline: stretcher
# -auto
# -stdout
# -asequence emboss_stretcher-I20141029-101340-0856-98043844-es.aupfile
# -bsequence emboss_stretcher-I20141029-101340-0856-98043844-es.bupfile
# -datafile EBLOSUM62
# -gapopen 12
# -gapextend 2
# -aformat3 pair
# -sprotein1
# -sprotein2
# Align_format: pair
# Report_file: stdout
#####
```

```
#=====
#
# Aligned_sequences: 2
# 1:
# 2:
# Matrix: EBLOSUM62
# Gap_penalty: 12
# Extend_penalty: 2
#
# Length: 587
# Identity:      586/587 (99.8%)
# Similarity:   586/587 (99.8%)
# Gaps:         0/587 ( 0.0%)
# Score: 3282
#
#=====
```

```
1 MLHLLALFLHCLPLASGDYDICKSWVTTDEGPTWEFYACQPKVMRLKDYV      50
  |||
1 MLHLLALFLHCLPLASGDYDICKSWVTTDEGPTWEFYACQPKVMRLKDYV      50
```

```

51 KVKVEPSGITCGDPPERFCSHENPYLCSNECDASNPDLAHPRLMFDKEE 100
   |||
51 KVKVEPSGITCGDPPERFCSHENPYLCSNECDASNPDLAHPRLMFDKEE 100

101 EGLATYWQSITWSRYPSPLEANITLSWNKTVELTDDVVMTFEYGRPTVMV 150
   |||
101 EGLATYWQSITWSRYPSPLEANITLSWNKTVELTDDVVMTFEYGRPTVMV 150

151 LEKSLDNGRTWQPYQFYAEDCMEAFGMSARRARDMSSSSAHRVLCTEEYS 200
   |||
151 LEKSLDNGRTWQPYQFYAEDCMEAFGMSARRARDMSSSSAHRVLCTEEYS 200

201 RWAGSKKEKHVRFEVRDRFAIFAGPDLRNDNLYTRLESAKGLKEFFTLLT 250
   |||
201 RWAGSKKEKHVRFEVRDRFAIFAGPDLRNDNLYTRLESAKGLKEFFTLLT 250

251 DLRMRLLRPALGGTYVQRENLYKYFYAISNIEVIGRCKCNLHANLCSMRE 300
   |||
251 DLRMRLLRPALGGTYVQRENLYKYFYAISNIEVIGRCKCNLHANLCSMRE 300

301 GSLQCEEHNTTGPDCGKCKKNFRTRSWRAGSYLPLPHGSPNACATAGSF 350
   |||
301 GSLQCEEHNTTGPDCGKCKKNFRTRSWRAGSYLPLPHGSPNACAAAGSF 350

351 GKWTRPSTAAPLSSRWSQVASRAEAVGTPAAAPAPAKGYKLFQLKPKSPQ 400
   |||
351 GKWTRPSTAAPLSSRWSQVASRAEAVGTPAAAPAPAKGYKLFQLKPKSPQ 400

401 VMPIEEFQDCECYGHSNRCSYIDFLNVVTCVSKHNTRGQHCQHCR LGYY 450
   |||
401 VMPIEEFQDCECYGHSNRCSYIDFLNVVTCVSKHNTRGQHCQHCR LGYY 450

451 RNSAELDDENVCIECNCNQIGSVHDCNETGFCECREGAAGPKDDCLP 500
   |||
451 RNSAELDDENVCIECNCNQIGSVHDCNETGFCECREGAAGPKDDCLP 500

501 THYWRQGCYPNVCDDQLLQNGGTCLQNRACACPRGYTGVRCEQPRCDP 550
   |||
501 THYWRQGCYPNVCDDQLLQNGGTCLQNRACACPRGYTGVRCEQPRCDP 550

551 ADDDGGLDCDRAPGAAPRPATLLGCLLLLGLAARLGR 587
   |||
551 ADDDGGLDCDRAPGAAPRPATLLGCLLLLGLAARLGR 587

```

```

#-----
#-----

```

Cookies on EMBL-EBI website

This website uses cookies to store a small amount of information on your computer, as part of the functioning of the site. Cookies used for the operation of the site have already been set.

To find out more about the cookies we use and how to delete them, see our [Cookie](#) and [Privacy](#) statements.

Dismiss this notice

# EMBOSS Stretcher

[Tools](#) > [Pairwise Sequence Alignment](#) > EMBOSS Stretcher

Results for job emboss\_stretcher-I20141113-061852-0842-34597676-es

```
#####
# Program: stretcher
# Rundate: Thu 13 Nov 2014 06:18:53
# Commandline: stretcher
# -auto
# -stdout
# -asequence emboss_stretcher-I20141113-061852-0842-34597676-es.aupfile
# -bsequence emboss_stretcher-I20141113-061852-0842-34597676-es.bupfile
# -datafile EBLOSUM62
# -gapopen 12
# -gapextend 2
# -aformat3 pair
# -sprotein1
# -sprotein2
# Align_format: pair
# Report_file: stdout
#####
```

```
#=====
#
# Aligned_sequences: 2
# 1:
# 2:
# Matrix: EBLOSUM62
# Gap_penalty: 12
# Extend_penalty: 2
#
# Length: 587
# Identity: 349/587 (59.5%)
# Similarity: 349/587 (59.5%)
# Gaps: 0/587 ( 0.0%)
# Score: 1744
#
#
#=====
```

```
1 MLHLLALFLHCLPLASGDYDICKSWVTTDEGPTWEFYACQPKVMRLKDYV 50
   .....| | | | | | | |
1 XXXXXXXXXXXXXXXXXXXXXXXXXXXXXXXXXXXXXXXXXXXXXXXKVMRLKDYV 50
```

```

51 KVKVEPSGITCGDPPERFCSHENPYLCSNECDASNPDLAHPRLMFDKEE      100
   |||...|||...|||...|||...|||...|||...|||...|||...|||...
51 KVKVEPSGITCGDPPERFCSHXXXXLCSNECDASNPDLAHHXXXXXXXXXX      100

101 EGLATYWQSIWTSRYPSPLEANITLSWNKTVELTDDVVMTFEYGRPTVMV      150
   .....|||...|||...|||...|||...|||...|||...|||...|||...
101 XXXXXYWQSIWTSRYPSPXXXXXLSWNKTVELTDDVVTTFEYGRPTVMV      150

151 LEKSLDNGRTWQPYQFYAEDCMEAFGMSARRARDMSSSSAHRVLCTEEYS      200
   |||...|||...|||...|||...|||...|||...|||...|||...|||...
151 LEKSLDNXXXXXXXXXXXXXEDCMEAFGMSARRXXXXXXXXXXXXXXXXXTEEYS      200

201 RWAGSKKEKHVRFEVDRDFAI FAGPDLRNDNLYTRLESAKGLKEFFTLT      250
   |||...|||...|||...|||...|||...|||...|||...|||...|||...
201 RWAGSKKEKHVRFEVDRDFAI FXGPDLRNDNLYTRLESAKGLKEFFTLT      250

251 DLRMRLLRPALGGTYVQRENLYKYFYAISNIEVIGRCKCNLHANLCSMRE      300
   |||.|||...|||...|||...|||...|||...|||...|||...|||...
251 DLRXXLLRPALGGTYVQRENLYKYFYAISNIEVIGRCKCNLHANXXXXXX      300

301 GSLQCEEHNTTGPDCGKCKKNFRTRS WRAGSYLPLPHGSPNACATAGSF      350
   .....|||...|||...|||...|||...|||...|||...|||...|||...
301 XXXXXEENHITGPDCGKCKNFXXXXXXXXXXXXXXXXXXXXXXXXXXXXX      350

351 GWTRPSTAAPLSSRWSQVASRAEAVGTPAAAPAPAKGYKLFQLKPKSPQ      400
   .....|||...|||...|||...|||...|||...|||...|||...|||...
351 XXXXXXXXXXXXXXXXXXXXXXXXXXXXEA VGT PAAAPAPXXXXXXXXXXXXX      400

401 VMPIEEFQDCECYGHSNRCSYIDFLNVVTCVSKHNTRGQHCHRLGYY      450
   .....|||...|||...|||...|||...|||...|||...|||...|||...
401 XXXXXXXXXCECYGHSNRCSYIDFLNVVTCVSKHNTRXXXXXXXXXRLGYY      450

451 RNSAELDDENVCIECNCNQIGSVHRCNETGFCECREGAAGPKCDDCLP      500
   |||...|||...|||...|||...|||...|||...|||...|||...|||...
451 RNSAELDDENVCIXCNCNQIGSVHRCNETGXXXXXXXXXXXXXXXXXDDCLP      500

501 THYWRQGCYPNVCDLQNGGTCLQNRACACPRGYTGVRCEQPRCDP      550
   |||...|||...|||...|||...|||...|||...|||...|||...|||...
501 THYWRQGCYPNVCDLQNGGTCLQXXXXXXXXXXXXXGVRCEQPRCDP      550

551 ADDDGGLDCDRAPGAAPR PATLLGCLLLLGLAARLGR      587
   .....|||...|||...|||...|||...|||...|||...|||...|||...
551 XXXXXXXXXXXXXXXXXXXXPATLLGCLLLLXXXXXXXXXX      587

```

```

#-----
#-----

```

**Cookies on EMBL-EBI website**

This website uses cookies to store a small amount of information on your computer, as part of the functioning of the site. Cookies used for the operation of the site have already been set.

To find out more about the cookies we use and how to delete them, see our [Cookie](#) and [Privacy](#) statements.

Dismiss this notice

# EMBOSS Stretcher

[Tools](#) > [Pairwise Sequence Alignment](#) > EMBOSS Stretcher

Results for job emboss\_stretcher-I20141030-041142-0278-79313696-es

```
#####
# Program: stretcher
# Rundate: Thu 30 Oct 2014 04:11:43
# Commandline: stretcher
#   -auto
#   -stdout
#   -asequence emboss_stretcher-I20141030-041142-0278-79313696-es.aupfile
#   -bsequence emboss_stretcher-I20141030-041142-0278-79313696-es.bupfile
#   -datafile EBLOSUM62
#   -gapopen 12
#   -gapextend 2
#   -aformat3 pair
#   -sprotein1
#   -sprotein2
# Align_format: pair
# Report_file: stdout
#####
```

```
#=====
#
# Aligned_sequences: 2
# 1:
# 2:
# Matrix: EBLOSUM62
# Gap_penalty: 12
# Extend_penalty: 2
#
# Length: 587
# Identity:      585/587 (99.7%)
# Similarity:   586/587 (99.8%)
# Gaps:         0/587 ( 0.0%)
# Score: 3279
#
#=====
```

```
1 MLHLLALFLHCLPLASGDYDICKSWVTTDEGPTWEFYACQPKVMRLKDYV 50
  |||
1 MLHLLALFLHCLPLASGDYDICKSWVTTDEGPTWEFYACQPKVMRLKDYV 50
```

```

51 KVKVEPSGITCGDPPERFCSHENPYLCSNECDASNPDLAHPRLMFDKEE 100
   |||
51 KVKVEPSGITCGDPPERFCSHENPYLCSNECDASNPDLAHPRLMFDKEE 100

101 EGLATYWQSITWSRYPSPLEANITLSWNKTVELTDDVVMTFEYGRPTVMV 150
   |||
101 EGLATYWQSITWSRYPSPLEANITLSWNKTVELTDDVVMTFEYGRPTVMV 150

151 LEKSLDNGRTWQPYQFYAEDCMEAFGMSARRARDMSSSSAHRVLCTEEYS 200
   |||
151 LEKSLDNGRTWQPYQFYAEDCMEAFGMSARRARDMSSSSAHRVLCTEEYS 200

201 RWAGSKKEKHVRFEVRDRFAIFAGPDLRNDNLYTRLESAKGLKEFFTLLT 250
   |||
201 RWAGSKKEKHVRFEVRDRFAIFAGPDLRNDNLYTRLESAKGLKEFFTLLT 250

251 DLRMRLLRPALGGTYVQRENLYKYFYAISNIEVIGRCKCNLHANLCSMRE 300
   |||
251 DLRMRLLRPALGGTYVQRENLYKYFYAISNIEVIGRCKCNLHANLCSMRE 300

301 GSLQCEEHNTTGPDCGKCKKNFRTRSWRAGSYLPLPHGSPNACATAGSF 350
   |||
301 GSLQCEEHNTTGPDCGKCKKNFRTRSWRAGSYLPLPHGSPNACAAAGSF 350

351 GKWTRPSTAAPLSSRWSQVASRAEAVGTPAAAPAPAKGYKLFQLKPKSPQ 400
   |||
351 GKWTRPSTAAPLSSRWSQVAARAEAVGTPAAAPAPAKGYKLFQLKPKSPQ 400

401 VMPIEEFQDCECYGHSNRCSYIDFLNVVTCVSKHNTRGQHCQHCR LGYY 450
   |||
401 VMPIEEFQDCECYGHSNRCSYIDFLNVVTCVSKHNTRGQHCQHCR LGYY 450

451 RNSAELDDENVCIECNCNQIGSVHDCNETGFCECREGAAGPKDDCLP 500
   |||
451 RNSAELDDENVCIECNCNQIGSVHDCNETGFCECREGAAGPKDDCLP 500

501 THYWRQGCYPNVCDDDDQLLCQNGGTCLQNQRACACPRGYTGVRCEQPRCDP 550
   |||
501 THYWRQGCYPNVCDDDDQLLCQNGGTCLQNQRACACPRGYTGVRCEQPRCDP 550

551 ADDDGGLDCDRAPGAAPRPATLLGCLLLLGLAARLGR 587
   |||
551 ADDDGGLDCDRAPGAAPRPATLLGCLLLLGLAARLGR 587

```

```

#-----
#-----

```

Cookies on EMBL-EBI website

This website uses cookies to store a small amount of information on your computer, as part of the functioning of the site. Cookies used for the operation of the site have already been set.

To find out more about the cookies we use and how to delete them, see our [Cookie](#) and [Privacy](#) statements.

Dismiss this notice

# EMBOSS Stretcher

[Tools](#) > [Pairwise Sequence Alignment](#) > EMBOSS Stretcher

Results for job emboss\_stretcher-I20141030-050745-0739-85030227-pg

```
#####
# Program: stretcher
# Rundate: Thu 30 Oct 2014 05:07:46
# Commandline: stretcher
# -auto
# -stdout
# -asequence emboss_stretcher-I20141030-050745-0739-85030227-pg.aupfile
# -bsequence emboss_stretcher-I20141030-050745-0739-85030227-pg.bupfile
# -datafile EBLOSUM62
# -gapopen 12
# -gapextend 2
# -aformat3 pair
# -sprotein1
# -sprotein2
# Align_format: pair
# Report_file: stdout
#####
```

```
#=====
#
# Aligned_sequences: 2
# 1:
# 2:
# Matrix: EBLOSUM62
# Gap_penalty: 12
# Extend_penalty: 2
#
# Length: 587
# Identity:      575/587 (98.0%)
# Similarity:    577/587 (98.3%)
# Gaps:          0/587 ( 0.0%)
# Score: 3227
#
#=====
```

```
1 MLHLLALFLHCLPLASGDYDICKSWVTTDEGPTWEFYACQPKVMRLKDYV 50
| | | | | | | | | | | | | | | | | | | | | | | | | | | | |
1 MLHLLALFLHCLPLASGDYDICKSWVTTDEGPTWEFYACQPKVMRLKDYV 50
```

```

51  KVKVEPSGITCGDPPERFCSHENPYLCSNECDASNPDLAHPRLMFDKEE      100
   ||||||||||||||||||||||||||||||||||||||||||||||||||||
51  KVKVEPSGITCGDPPERFCSHENPYLCSNECDASNPDLAHPRLMFDKEE      100

101 EGLATYWQSITWSRYPSPLEANITLSWNKTVELTDDVVMTFEYGRPTVMV     150
   |||.||||||||||||||||||||||||||||||||||||||||||||||
101 EGLVTYWQSITWSRYPSPLEANITLSWNKTVELTDDVVMTFEYGRPTVMV     150

151 LEKSLDNGRTWQPYQFYAEDCMEAFGMSARRARDMSSSSAHRVLCTEEYS     200
   ||||||||||||||||||||||||||||||||||||||||||||||||
151 LEKSLDNGRTWQPYQFYAEDCMEAFGMSARRARDMSSSSAHRVLCTEEYS     200

201 RWAGSKKEKHVRFEVRDRFAIFAGPDLRNDNLYTRLESAKGLKEFFTLT     250
   ||||||||||||||||||||||||||||||||||||||||||||||||
201 RWAGSKKEKHVRFEVRDRFAIFAGPDLRNDNLYTRLESAKGLKEFFTLT     250

251 DLRMRLLRPALGGTYVQRENLYKYFYAISNIEVIGRCKCNLHANLCSMRE     300
   ||||||||||||||||||||||||||||||||||||||||||||:|
251 DLRMRLLRPALGGTYVQRENLYKYFYAISNIEVIGRCKCNLHANLCSVRE     300

301 GSLQCEEHNTTGPDCGKCKKNFRTRSWRAGSYLPLPHGSPNACATAGSF     350
   |||||||||||||||||||||||||||||||||||||||||.||
301 GSLQCEEHNTTGPDCGKCKKNFRTRSWRAGSYLPLPHGSPNACSAAGSF     350

351 GKWTRPSTAAPLSSRWSQVASRAEAVGTPAAPAPAKGYKLFQLKPKSPQ     400
   |||.|||||.|||.|||.|||.|||.|||.|||.|||.|||.|||.
351 GKWTRPSTAAPLSGRWSQVVVRAEAVGTPATAPAPAKGSKLFQLKPKSPQ     400

401 VMPIEEFQDCECYGHSNRCSYIDFLNVVTCVSKHNTRGQHCQHCR LGYY     450
   ||||||||||||||||||||||||||||||||||||||||||||
401 VMPIEEFQDCECYGHSNRCSYIDFLNVVTCVSKHNTRGQHCQHCR LGYY     450

451 RNSAELDDENVCIECNCNQIGSVHRCNETGFCECREGAAGPKDDCLP     500
   ||||||||||||||||||||||||||||||||||||||||||||
451 RNSAELDDENVCIECNCNQIGSVHRCNETGFCECREGAAGPKDDCLP     500

501 THYWRQGCYPNVCDDQLLCLNGGTCLQNRACACPRGYTGVRCEQPRCDP     550
   |||.||||||||||||||||||||||||||||||||||||||
501 THYWRQGCYPNVCDDQLLCLNGGTCLQNRACACPRGYTGVRCEQPRCDP     550

551 ADDDGGLDCDRAPGAAPRPATLLGCLLLLGLAARLGR      587
   |||.|||||||||||||||||||||||||||||||||||.
551 ADDDGGLDCDRAPGAAPHPATLLGCLLLLGLAARLGH      587
    
```

```

#-----
#-----
    
```



Cookies on EMBL-EBI website

This website uses cookies to store a small amount of information on your computer, as part of the functioning of the site. Cookies used for the operation of the site have already been set.

To find out more about the cookies we use and how to delete them, see our [Cookie](#) and [Privacy](#) statements.

Dismiss this notice

# EMBOSS Stretcher

[Tools](#) > [Pairwise Sequence Alignment](#) > EMBOSS Stretcher

Results for job emboss\_stretcher-I20141029-101504-0513-95492894-es

```
#####
# Program: stretcher
# Rundate: Wed 29 Oct 2014 10:15:05
# Commandline: stretcher
# -auto
# -stdout
# -asequence emboss_stretcher-I20141029-101504-0513-95492894-es.aupfile
# -bsequence emboss_stretcher-I20141029-101504-0513-95492894-es.bupfile
# -datafile EBLOSUM62
# -gapopen 12
# -gapextend 2
# -aformat3 pair
# -sprotein1
# -sprotein2
# Align_format: pair
# Report_file: stdout
#####
```

```
#=====
#
# Aligned_sequences: 2
# 1:
# 2:
# Matrix: EBLOSUM62
# Gap_penalty: 12
# Extend_penalty: 2
#
# Length: 590
# Identity:      537/590 (91.0%)
# Similarity:   554/590 (93.9%)
# Gaps:         4/590 ( 0.7%)
# Score: 2993
#
#
#=====
```

```
1 MLHLLALFLHCLPLASGDYDICKSWVTTDEGPTWEFYACQPKVMRLKDYV    50
  ||.|||.|.|.|.|.|.|.|.|.|.|.|.|.|.|.|.|.|.|.|.|.|.|.|
1 MLRLLALFLHCLPLVSGDYDICKSWVTTDEGPTWEFYACQPKVMRLKDYV    50
```

```

51 KVKVEPSGITCGDPPERFCSHENPYLCSNECDASNPDLAHPRLMFDKEE 100
   |||||||:|||||:|||||:|||||:|||||:|||||:|||||:|||||:|
51 KVKVEPSGITCGDPPERFCSHENPYLCSNECDASNPDLAHPRLMFDRED 100

101 EGLATYWQSITWSRYPSPLEANITLSWNKTVELTDDVVMTFEYGRPTVMV 150
   |||||||:|||||:|||||:|||||:|||||:|||||:|||||:|||||:|
101 EGLATYWQSVTWSRYPSPLEANITLSWNKSVELTDDVVVTFEYGRPTVMV 150

151 LEKSLDNGRTWQPYQFYAEDCMEAFGMSARRARDMSSSSAHRVLCTEEYS 200
   |||||||:|||||:|||||:|||||:|||||:|||||:|||||:|||||:|
151 LEKSLDNGRTWQPYQFYAEDCMEAFGMSARRARDMSPSSAHRVLCTEEYS 200

201 RWAGSKKEKHVRFEVRDRFAIFAGPDLRNDNLYTRLESAGLKEFFTTLT 250
   |||||||:|||||:|||||:|||||:|||||:|||||:|||||:|||||:|
201 RWAGSKKEKHVRFEVRDRFAIFAGPDLRNDNLYTRMESAGLKEFFTFT 250

251 DLRMRLLRPALGGTYVQRENLYKYFYAISNIEVIGRCKCNLHANLCSMRE 300
   |||||||:|||||:|||||:|||||:|||||:|||||:|||||:|||||:|
251 DLRMRLLRPALGGTYVQRENLYKYFYAISNIEVIGRCKCNLHANLCTVRE 300

301 GSLQCEEHNTTGPDCGKCKNFRTRSWRAGSYLPLPHGSPNACATAGS- 349
   |||||||:|||||:|||||:|||||:|||||:|||||:|||||:|||||:|
301 GSLQCEEHNTTGPDCGRCKKNFRTRAWRAGSYLPLPHGSPNACAAAGSA 350

350 FGKWTRPSTAAPL--SSRWSQVASRAEAVGTPAAAPAPAKGYKLFQLKPK 397
   ||.:|:|.|.|| |.|.|.||:|.|||. ....|. |:|. |.:|:|:|:|
351 FGSQTKPPTMAPLGDSSFWPQVSSSAEVAISVAVPSQAKDSTLFELKPR 400

398 SPQVPIIEEFQDCECYGHSNRCSYIDFLNVVTCVSKHNTRGQHCQHCL 447
   ||| |:|:|:|:|:|:|:|:|:|:|:|:|:|:|:|:|:|:|:|:|:|:|
401 SPQVPIIEEFQDCECYGHSNRCSYIDFLNVVTCVSKHNTRGQHCQHCL 450

448 GYRNGSAELDDENVCIECNQIGSVHRCNETGFCECREGAAGPKCDD 497
   |||||||:|||||:|||||:|||||:|||||:|||||:|||||:|||||:|
451 GYRNGSAELDDENVCIECNQIGSVHRCNETGFCECREGAVGPKCDD 500

498 CLPTHYWRQGCYPNVCDQDQLLCQNGGTCLQQRACACPRGYTGVRCEQPR 547
   |||||||:|||||:|||||:|||||:|||||:|||||:|||||:|||||:|
501 CLPTHYWRQGCYPNVCDQDQLLCQNGGTCCQNQRACACPPGYTGIRCEQPR 550

548 CDPADDGGLDCDRAPGAAPRPATLLGCLLLLGLAARLGR 587
   ||.:| |.|.|||||. .|.|||. |||. |||. |||. |||. |||. |||.
551 CDLADD-AGPDCDRAPGIVRPDPTLLGCLLLLGLAARLAC 589

```

```

#-----
#-----

```
